# Supplementary material
Source: PubMed Central journal article supplement (PMC7377452)
Supplement: NIHMS1608487-supplement-1.pdf [file NIHMS1608487-supplement-1.pdf]

**Supplemental Information**

**The PD-1 Pathway Regulates Development  
and Function of Memory CD8<sup>+</sup> T Cells  
following Respiratory Viral Infection**

**Kristen E. Pauken, Jernej Godec, Pamela M. Odorizzi, Keturah E. Brown, Kathleen B. Yates, Shin Foong Ngiow, Kelly P. Burke, Seth Maleri, Shannon M. Grande, Loise M. Francisco, Mohammed-Alkhatim Ali, Sabrina Imam, Gordon J. Freeman, W. Nicholas Haining, E. John Wherry, and Arlene H. Sharpe**

Figure S1

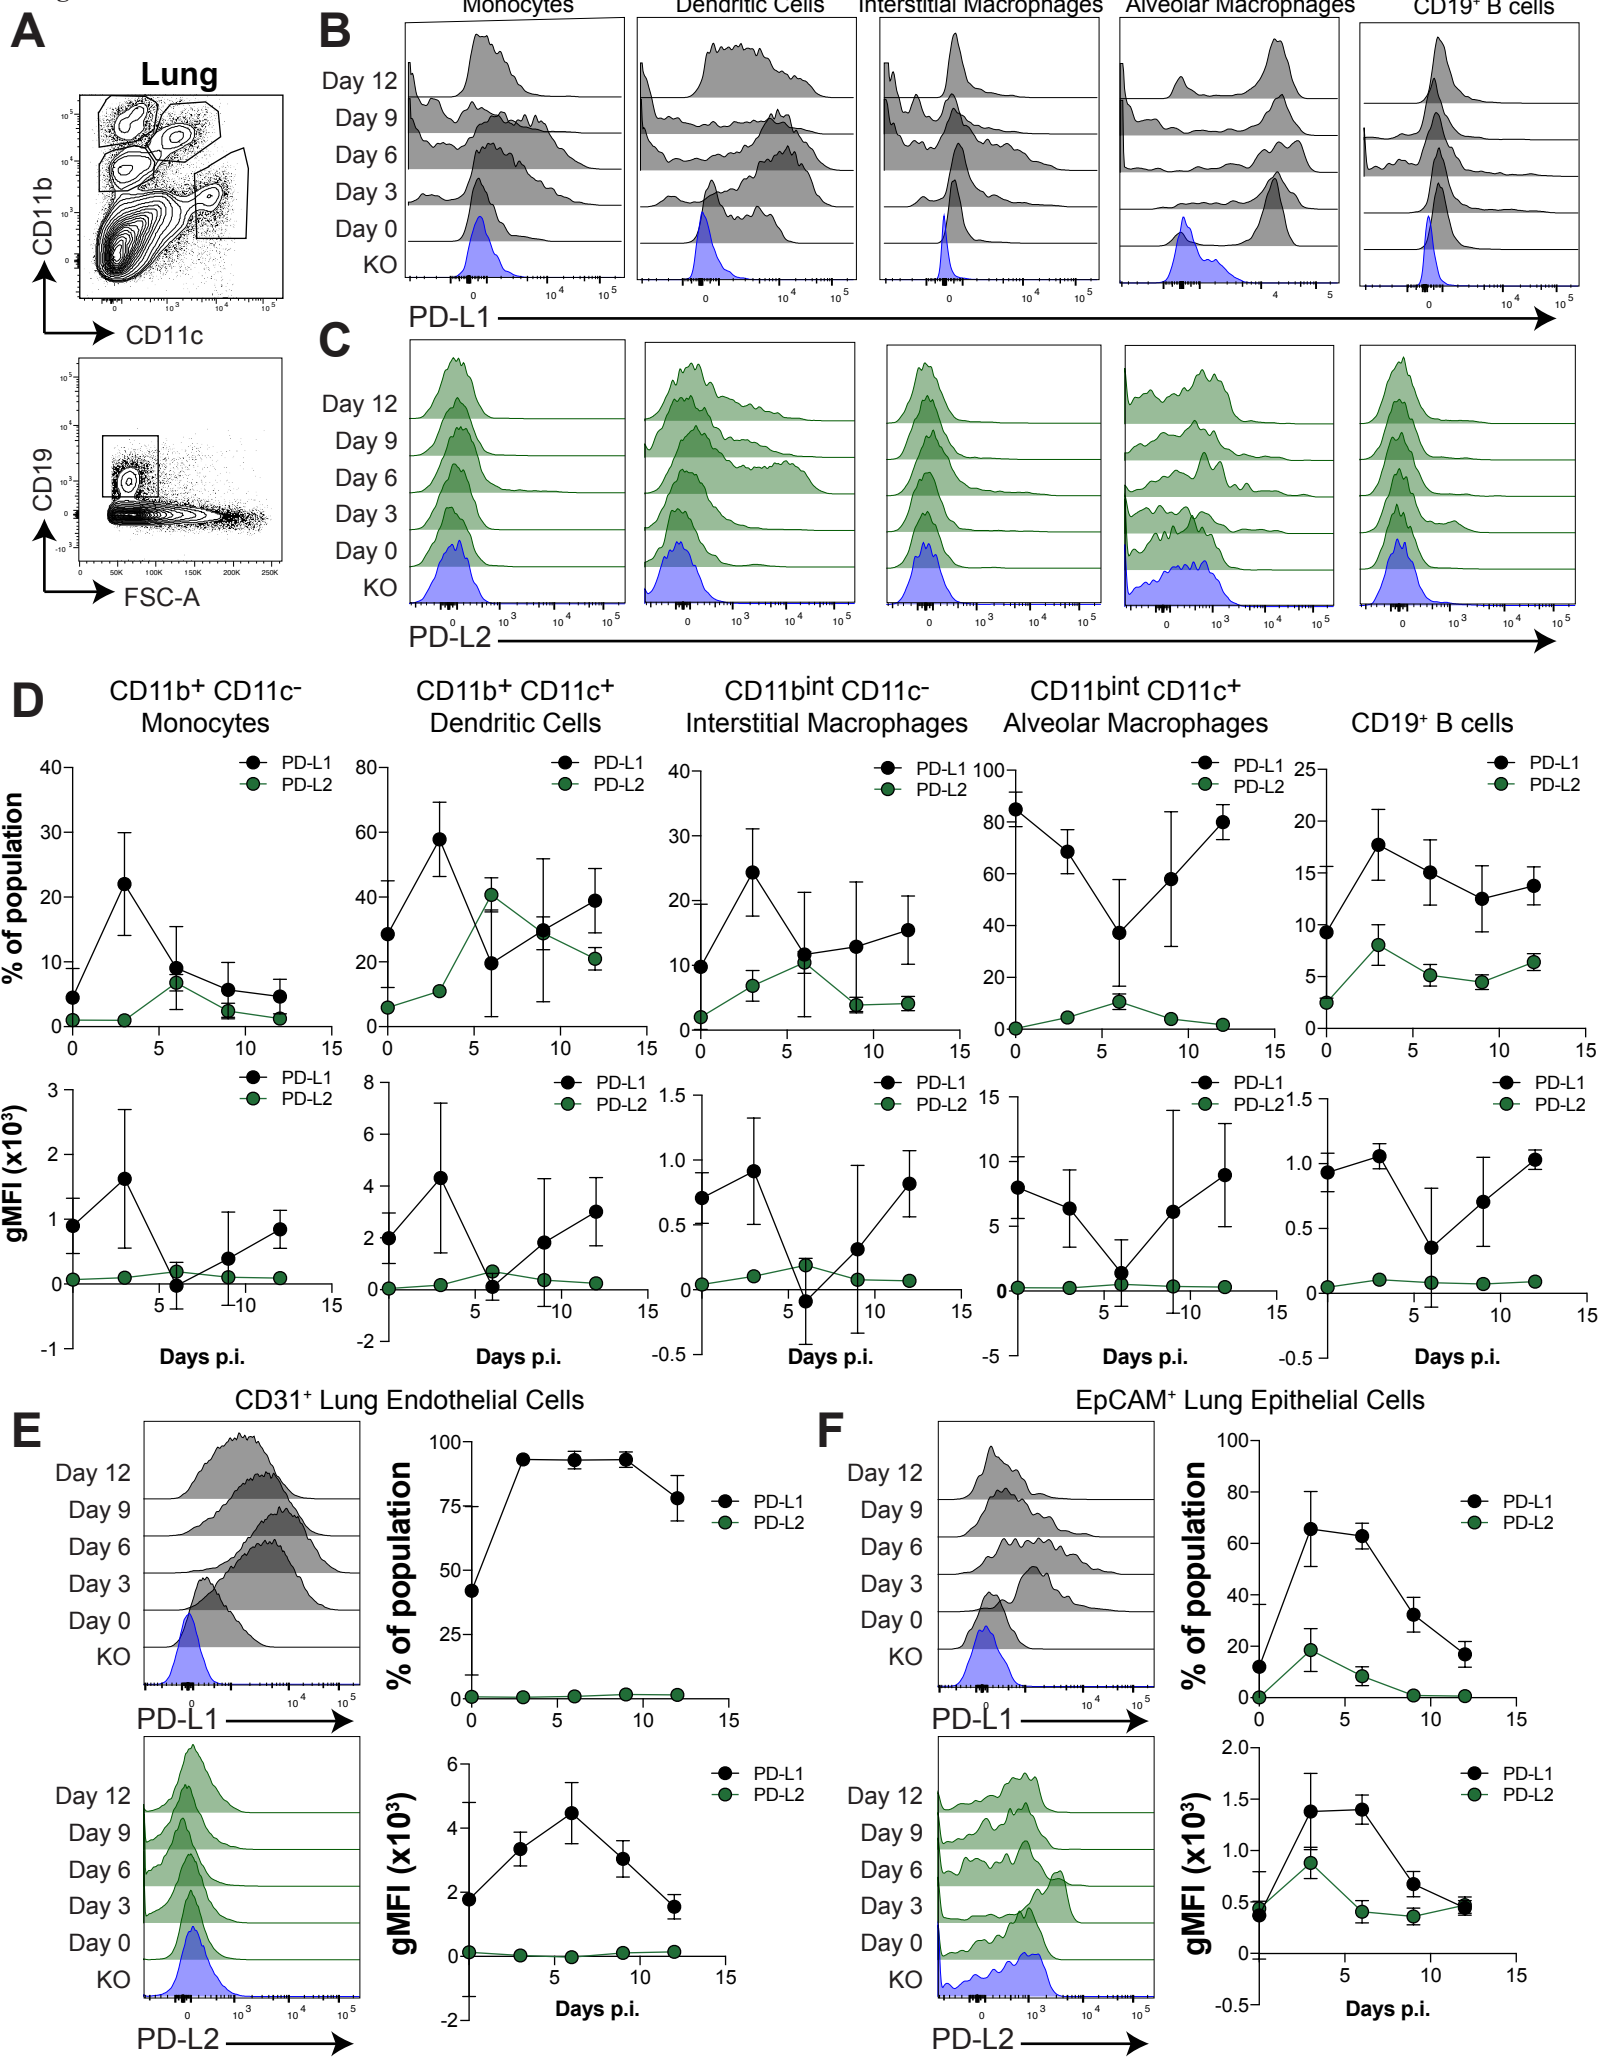

**Figure S1, related to Figure 1.** Expression of PD-L1 and PD-L2 on lung cell subsets following influenza infection. Phenotypic analysis of PD-L1 and PD-L2 expression on cell subsets following X31-GP33 infection. (A) Gating strategy used for lung myeloid subsets and B cells in (B - D). Expression of PD-L1 (black) and PD-L2 (green) in lung myeloid subsets and B cells (B - D), endothelial cells (E), and epithelial cells (F) following primary X31-GP33 influenza infection. Blue histogram indicates KO control. Representative flow cytometry histograms and summary data of 5 mice per group shown for each population. Data are represented as mean  $\pm$  SEM. Abbreviations used include: MFI=mean fluorescence intensity, p.i.=post-infection.

Figure S2

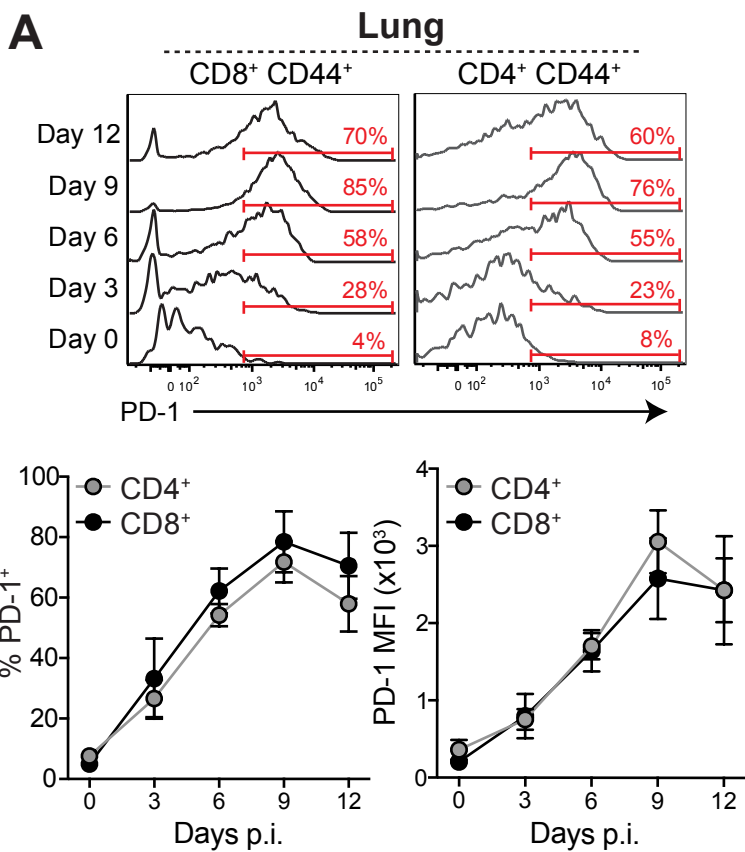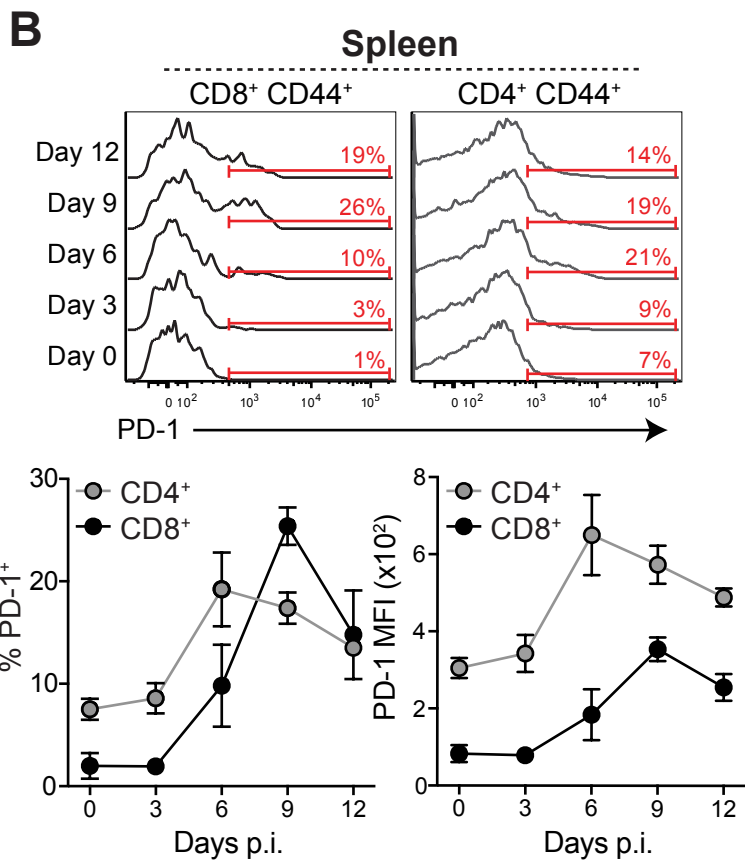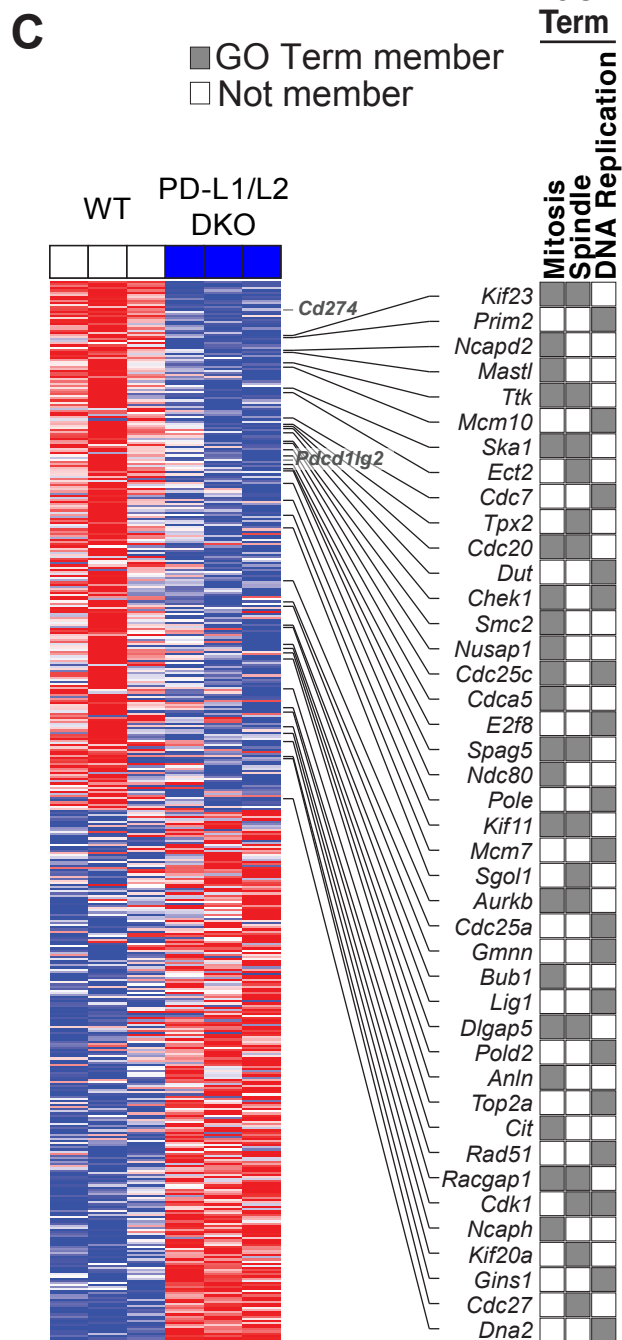

**Figure S2, related to Figure 1.** Expression of PD-1 on lung cell subsets following influenza infection and gene expression in PD-1 pathway deficient mice. (A, B) WT mice were infected with X31-GP33 influenza and antigen-experienced CD44<sup>+</sup> CD8<sup>+</sup> and CD44<sup>+</sup> CD4<sup>+</sup> T cells were analyzed for their expression of PD-1 before (d0) and after (d3-d12) infection in the lung (A) and spleen (B). Representative plots (top) and summarized frequencies (of parent gate) and MFI shown (bottom). CD4<sup>+</sup> T cells are shown in grey, CD8<sup>+</sup> T cells are shown in black. Representative flow cytometry histograms and summary of data of 5 mice per group shown for each population. These data are from one representative experiment with mean  $\pm$  SD. Data from key time points (days 0, 8) are representative of 2-3 independent experiments with 2-7 mice per group. (C) Top 250 differentially expressed genes in subdominant-epitope (D<sup>b</sup>GP<sub>33-41</sub> and D<sup>b</sup>PA<sub>224-233</sub>) specific T cells from WT and PD-L1/PD-L2 DKO mice ranked by signal-to-noise values following filtration to top 10% of genes with highest mean absolute deviation across samples. Membership of genes in the three representative GO terms is shown on the right. Abbreviations used include: MFI=mean fluorescence intensity, p.i.=post-infection, GO=Gene Ontogeny.

Figure S3

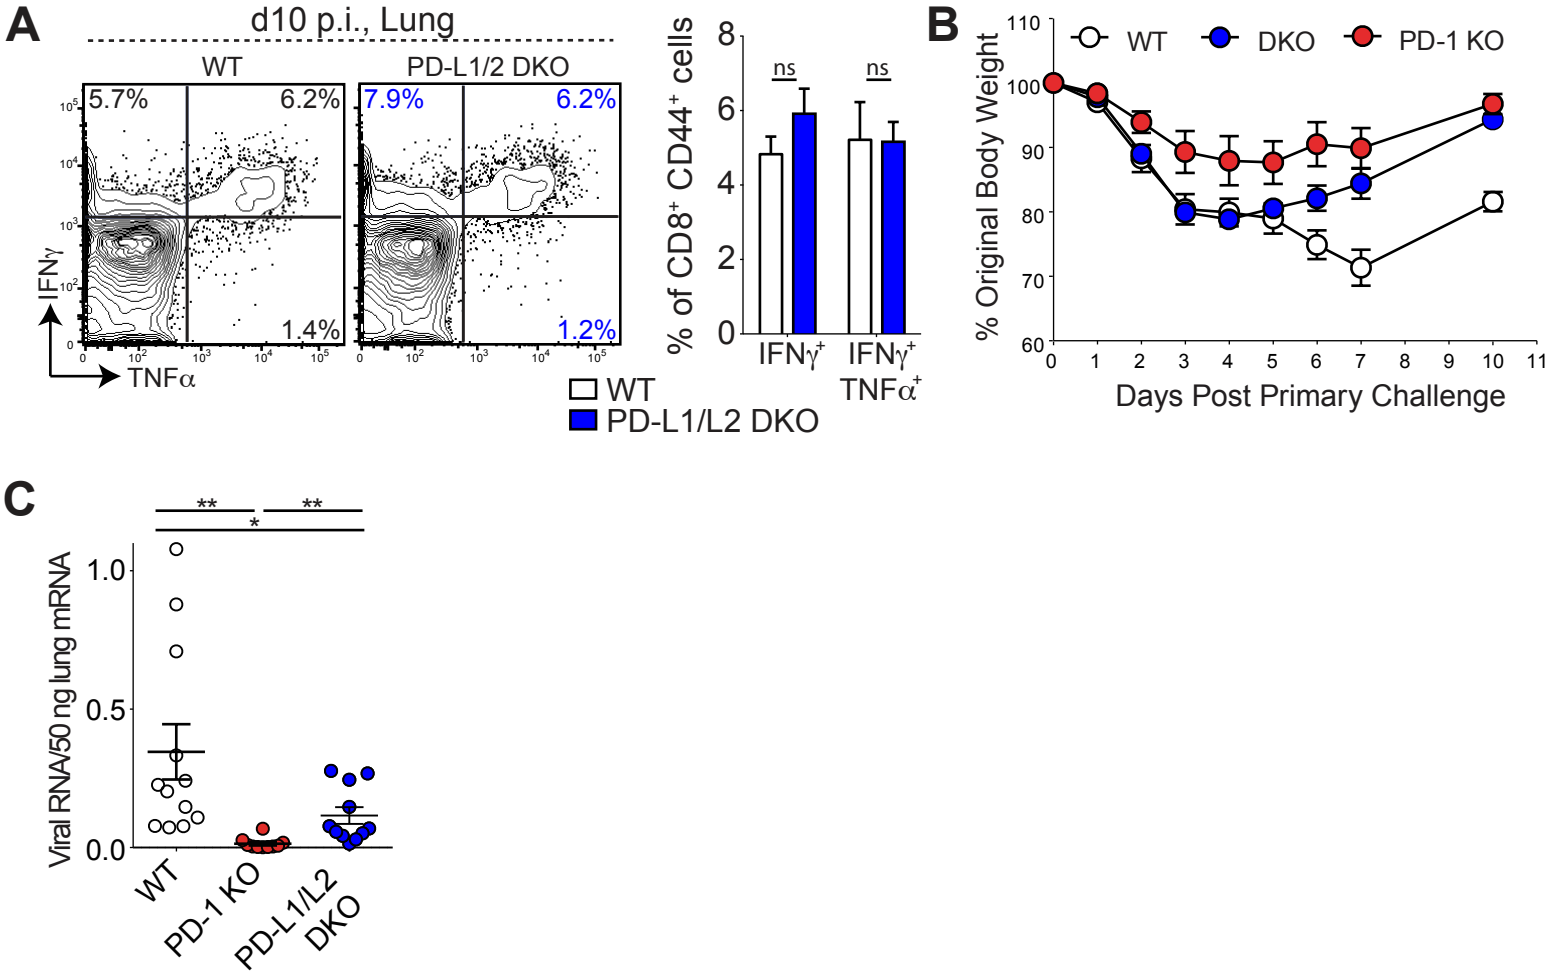

**Figure S3, related to Figure 1.** PD-1 deficient mice show enhanced disease control following primary X31-GP33 infection. (A) Representative plots of intracellular cytokine staining for IFN- $\gamma$  and TNF- $\alpha$  production in lung CD8<sup>+</sup> T cells on d10 p.i. following *ex vivo* stimulation with NP<sub>366-374</sub> peptide. Representative plots gated on CD8<sup>+</sup> CD44<sup>+</sup> T cells (left) and summary of percent responding cells (right) from 5 mice per group. (B) Weight loss in WT, PD-1 KO, and PD-L1/L2 DKO mice following primary infection with X31-GP33. (C) Influenza viral titers in the lung of WT, PD-1 KO, and PD-L1/L2 DKO mice at d7 p.i. Data are representative of 2-3 independent experiments with 3-5 mice per experiment. Data are represented as mean  $\pm$  SEM. Significance was assessed using Student's t-test; ns = not significant P > 0.05, \*P < 0.05, \*\*P < 0.01. Abbreviations used include: p.i.=post-infection.

Figure S4

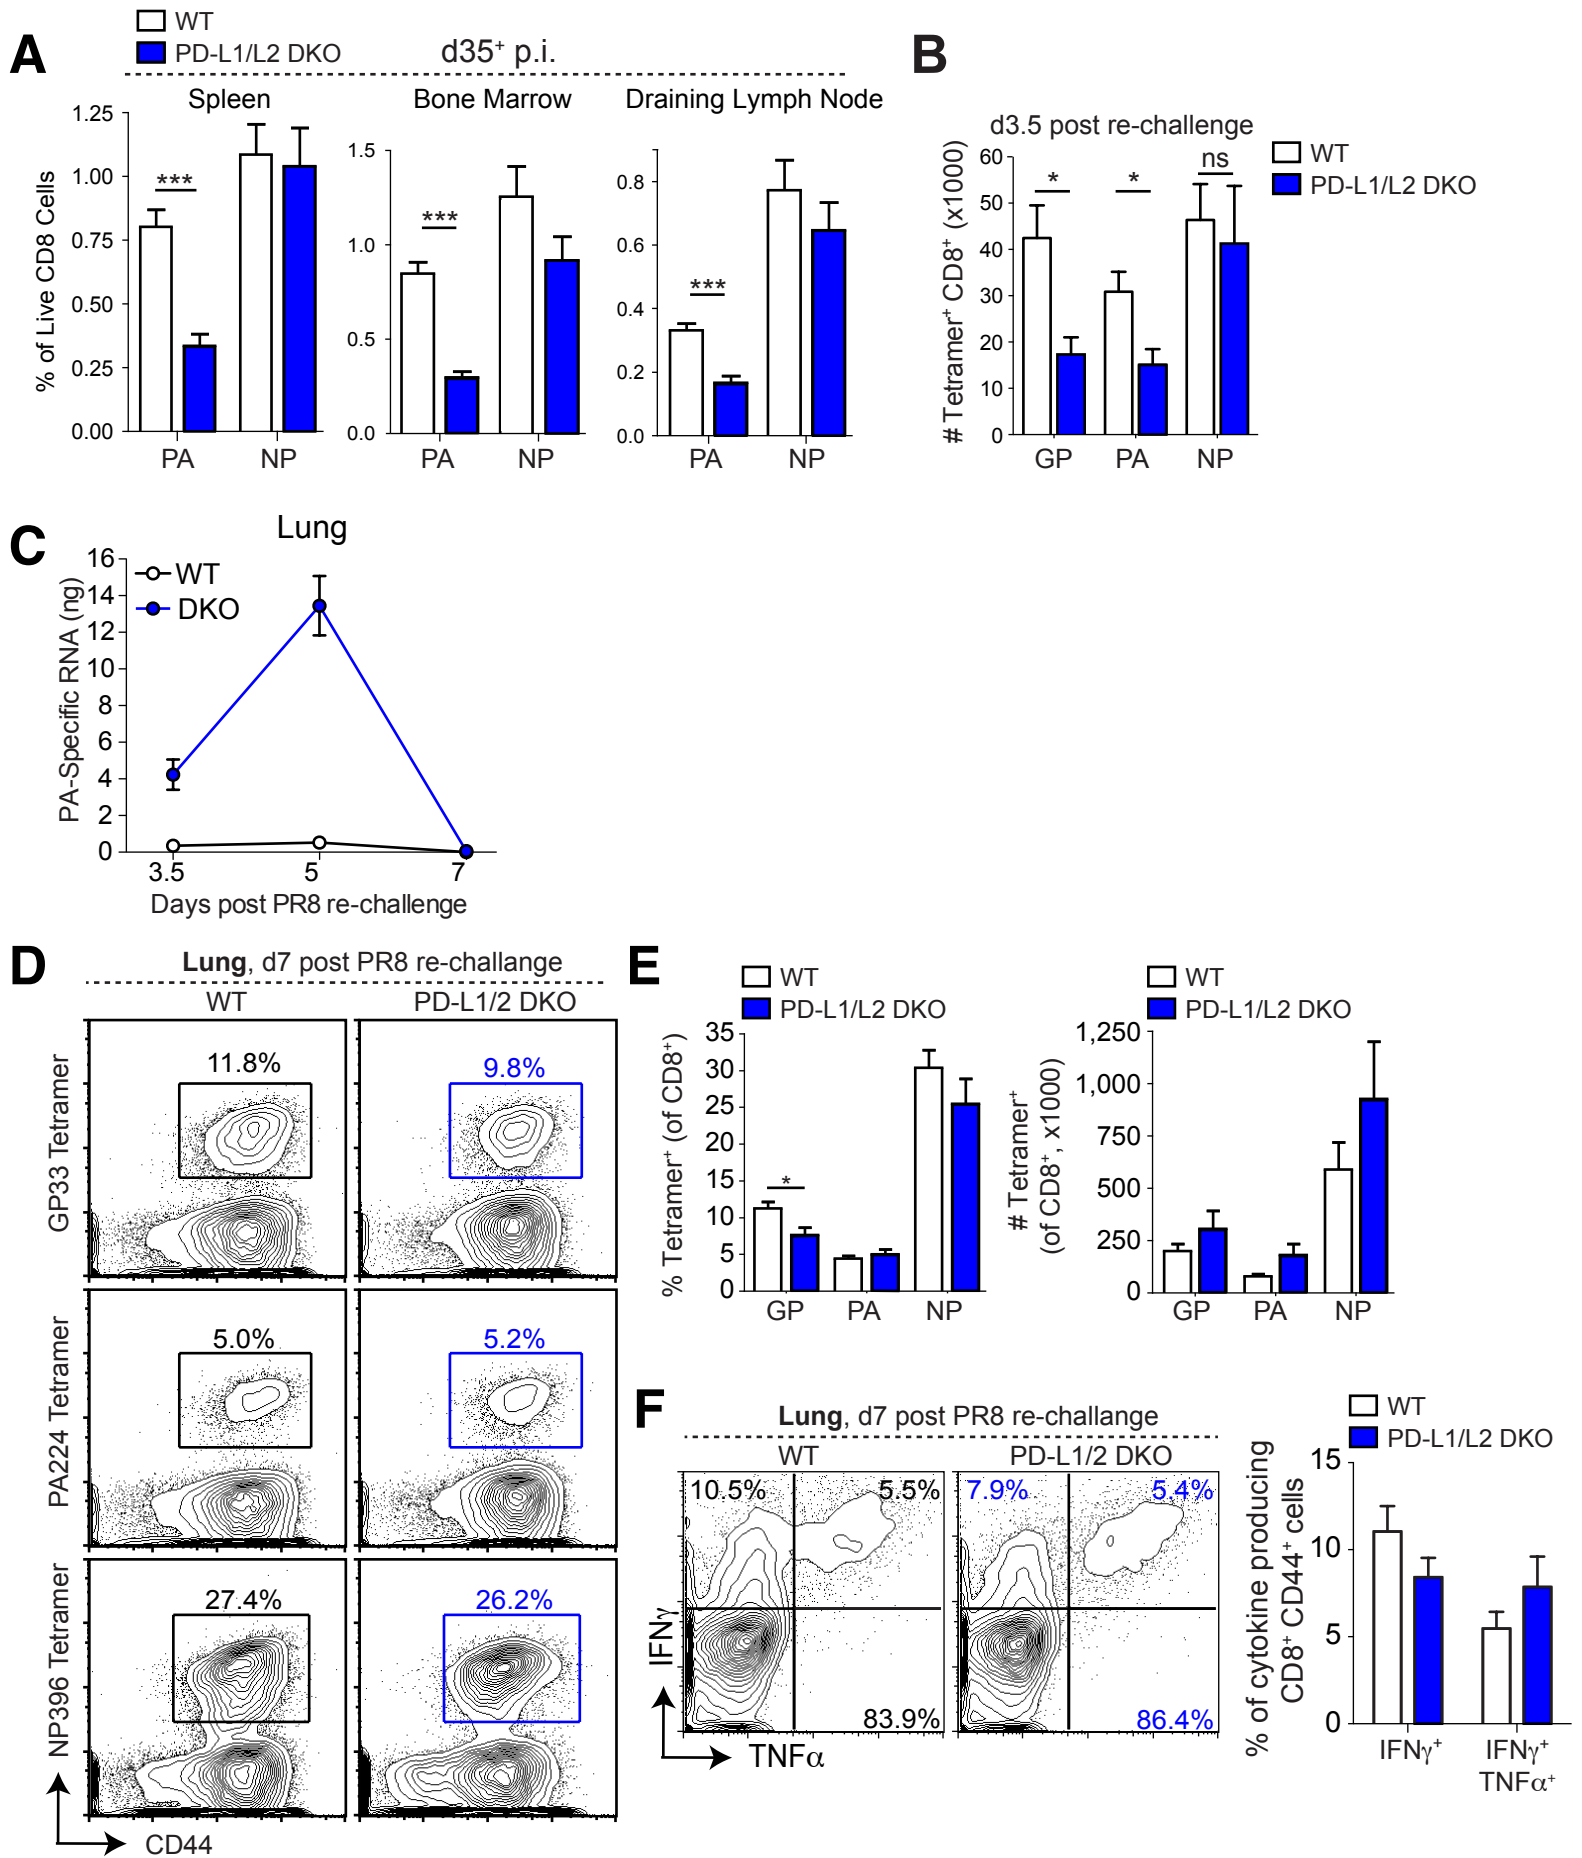



**Figure S4, related to Figure 2.** Influenza-specific CD8<sup>+</sup> T cell numbers normalize at day 7 after secondary PR8-GP33 infection. (A) Summary of frequencies of memory CD8<sup>+</sup> T cells specific for influenza epitopes in the spleen (left), bone marrow (middle) and lung draining LN (right) in WT and PD-L1/PD-L2 DKO mice at d35<sup>+</sup> p.i. following primary X31-GP33 infection. (B) Summary of numbers of indicated tetramer<sup>+</sup> CD8<sup>+</sup> T cells in the lungs of WT and PD-L1/L2 DKO mice at d3.5 post-re-challenge with PR8-GP33. (C) Kinetics of viral clearance in WT and PD-L1/L2 DKO mice following secondary infection with PR8-GP33, 35 days following primary X31-GP33 infection. (D) Representative plots showing the frequencies of D<sup>b</sup>GP<sub>33-41</sub><sup>+</sup> (upper), D<sup>b</sup>PA<sub>224-233</sub><sup>+</sup> (middle) and D<sup>b</sup>NP<sub>366-374</sub><sup>+</sup> (lower) CD8<sup>+</sup> T cells in the lungs of X31-GP33 immune WT and PD-L1/L2 DKO mice on d7 post-rechallenge with PR8-GP33. (E) Summary of mice shown in (D) indicating frequencies (left) and numbers (right) of CD8<sup>+</sup> T cells specific for influenza epitopes in lung of WT and PD-L1/L2 DKO mice on d7 post-rechallenge with PR8-GP33. (F) Representative plots for IFN $\gamma$  and TNF $\alpha$  production in lung CD8<sup>+</sup> T cells from (D) and (E) stimulated *ex vivo* with NP<sub>366-374</sub> peptide (left). Fraction of responding cells summarized (right). Data are representative of 2-4 independent experiments with 4-5 mice per experiment. Data are represented as mean  $\pm$  SEM. Significance was assessed using Student's t-test; \*P < 0.05, \*\*\*P < 0.001. Abbreviations used include: GP=D<sup>b</sup>GP<sub>33-41</sub> tetramer, PA=D<sup>b</sup>PA<sub>224-233</sub> tetramer, NP=D<sup>b</sup>NP<sub>366-374</sub> tetramer.

Figure S5

**A**

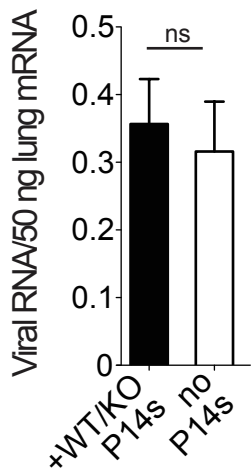

**C**

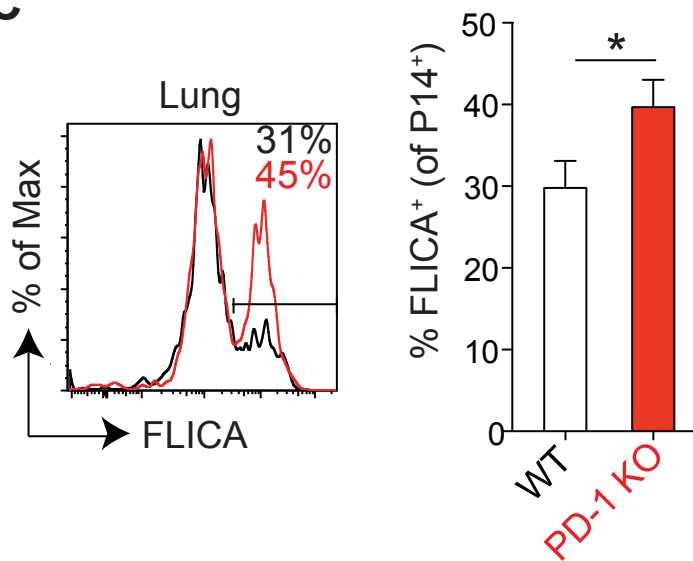

**B**

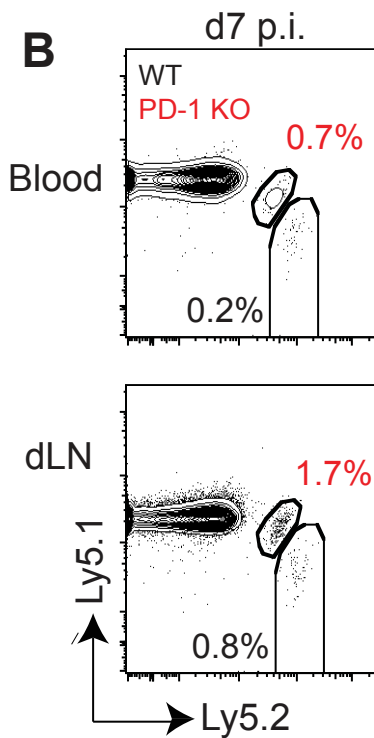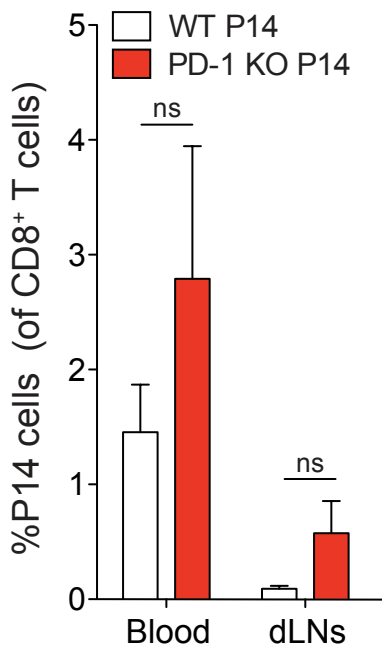

**D**

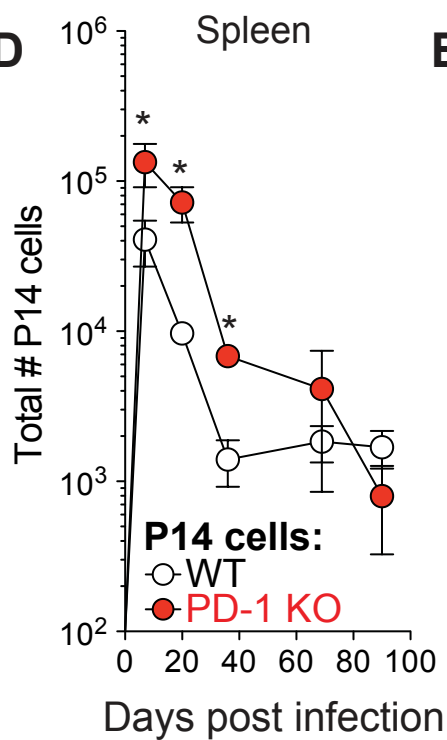

**E**

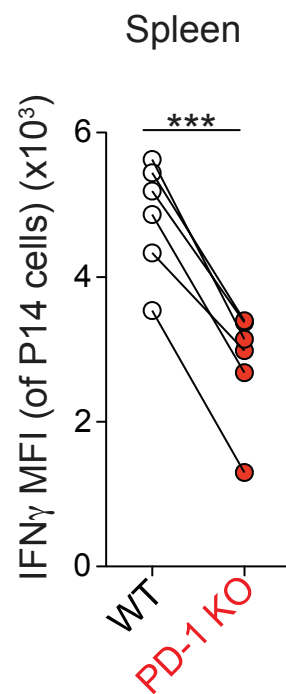

**Figure S5, related to Figure 3.** PD-1 controls CD8<sup>+</sup> T cell functions in a cell-intrinsic manner. (A) Quantification of viral load d8 after X31-GP33 infection in WT mice compared to WT mice that received a 50:50 mixture of WT and PD-1 KO P14 cells. (B) Representative plots (left) showing frequencies of WT and PD-1 KO P14 cells in indicated organs at d7 after X31-GP33 infection. Numbers indicate frequency of P14 cells as a percent of CD8<sup>+</sup> T cells. Summary of frequencies is shown on the right. (C) Flow cytometric analysis of active caspase by FLICA staining of lung WT and PD-1 KO P14 T cells on d8 p.i. Numbers indicate fraction of P14 cells positive for FLICA staining based on unstained controls. Representative histogram shown (left) and summary of frequencies of FLICA<sup>+</sup> cells shown (right). (D) Longitudinal analysis of WT and PD-1 KO P14 absolute cell numbers in the spleen during primary X31-GP33 infection. (E) Summary of MFI of WT and PD-1 KO P14 cell IFN- $\gamma$  expression on d60<sup>+</sup> p.i. with X31-GP33 following *ex vivo* stimulation with GP<sub>33-41</sub> peptide. Data are representative of 3 independent experiments with 4-5 mice per group. Data are represented as mean  $\pm$  SEM. Significance was assessed using Student's t-test; \*P < 0.05, \*\*\* P < 0.001. Abbreviations used include: MFI=mean fluorescence intensity.

**Figure S6****A.**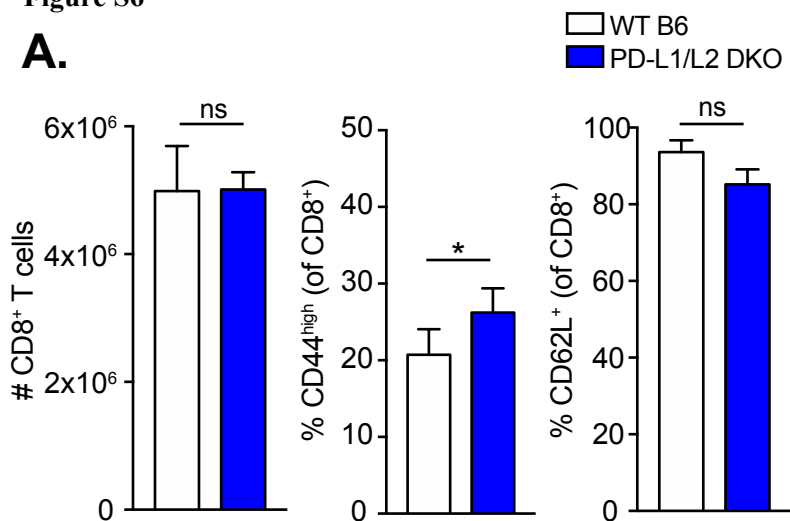**B.**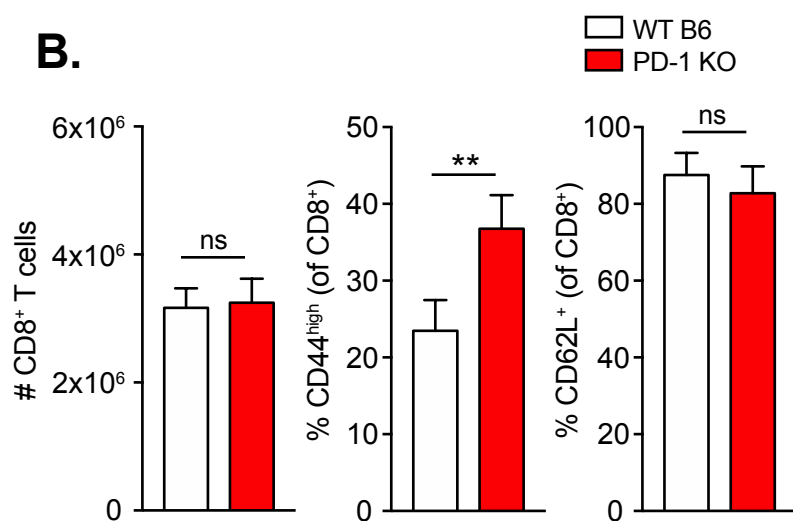**C.**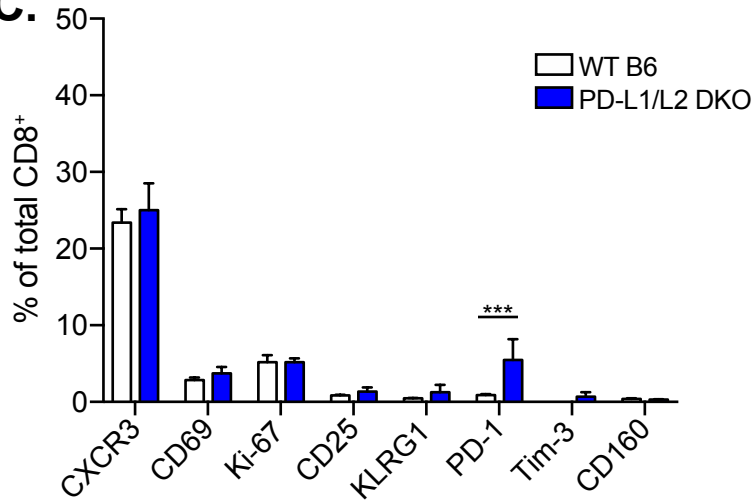**D.**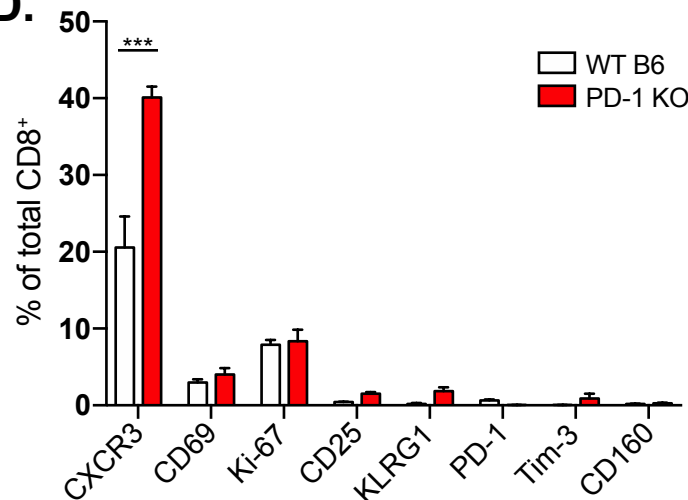**E.**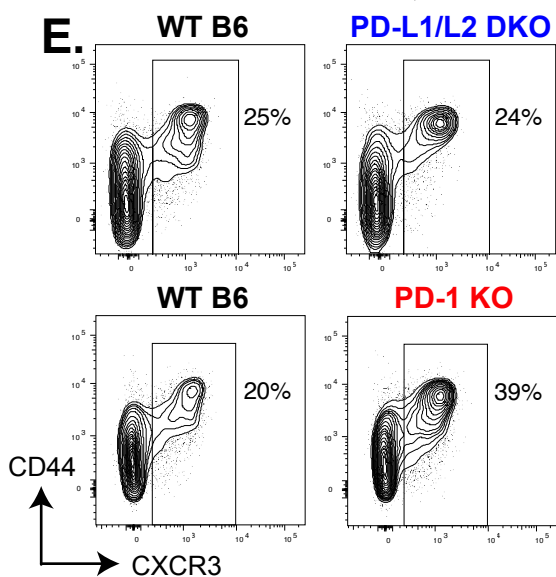**F.**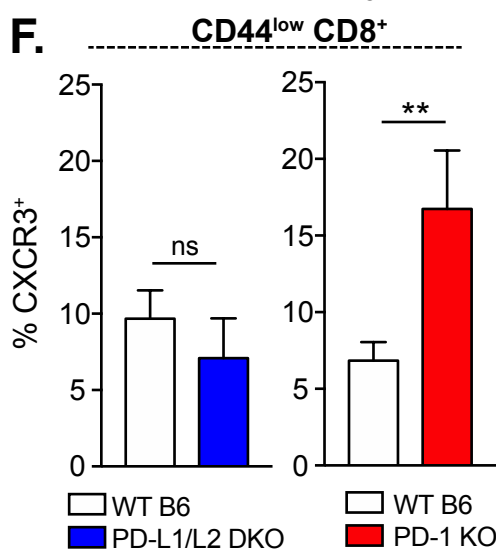**G.**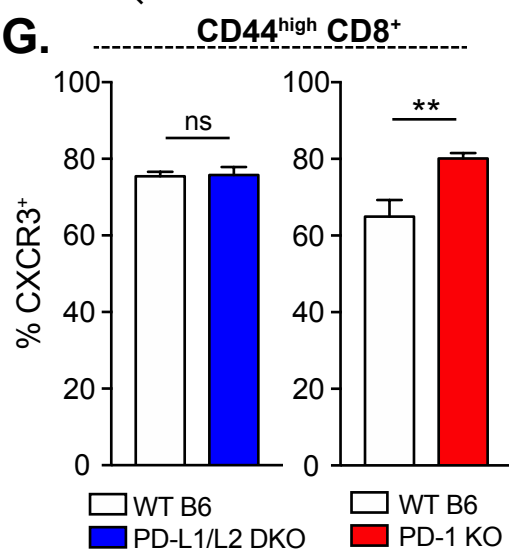**H.**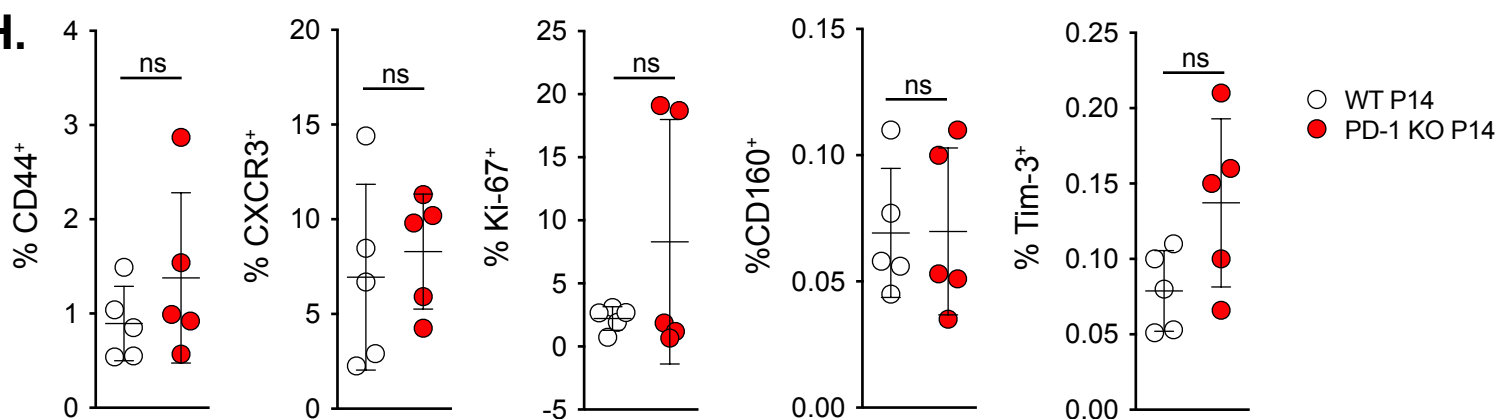

**Figure S6, related to Figure 3.** Phenotypic characterization of CD8<sup>+</sup> T cells in the steady state in naïve PD-1 KO, PD-L1/L2 DKO, and PD-1 KO P14 mice compared to WT. (A, B) Number of CD8<sup>+</sup> T cells (left), frequency of CD44<sup>high</sup> cells of the CD8<sup>+</sup> T cell population (middle), and frequency of CD62L<sup>+</sup> cells of the CD8<sup>+</sup> T cell population (right) in the spleen of uninfected 8-12 week old WT and PD-L1/L2 DKO mice (A) or WT and PD-1 KO mice (B). (C, D) Frequency of CD8<sup>+</sup> T cells in the spleen of the WT vs. PD-L1/L2 DKO (C) and PD-1 KO (D) shown in (A) and (B) that are positive for the indicated markers. (E) Representative flow cytometry contour plots showing CD44 and CXCR3 expression on CD8<sup>+</sup> T cells in spleens from WT, PD-L1/L2 DKO, and PD-1 KO mice shown in (A)-(D). (F, G) Quantification of the frequency CD8<sup>+</sup> CD44<sup>low</sup> (F) or CD44<sup>high</sup> cells (G) expressing CXCR3 in the spleen of WT and PD-L1/L2 DKO mice (left) or WT and PD-1 KO mice (right). (H) Frequency of P14 cells in the peripheral blood of intact WT or PD-1 KO P14 mice that are positive for the indicated markers. Data are representative of 2 independent experiments with 4-6 mice per group. Data are represented as mean ± SEM. Significance was assessed using unpaired Student's t-test in (A), (B), (F), (G), and (H), and 2 way ANOVA using multiple comparisons (Sidak's) post-test for (C) and (D); \*\*P < 0.01, \*\*\* P < 0.001.
