# Supplementary material
Source: PubMed Central journal article supplement (PMC7377452)
Supplement: NIHMS1608487-supplement-2.pdf [file NIHMS1608487-supplement-2.pdf]

# The PD-1 Pathway Regulates Development and Function of Memory CD8<sup>+</sup> T Cells following Respiratory Viral Infection

## Graphical Abstract

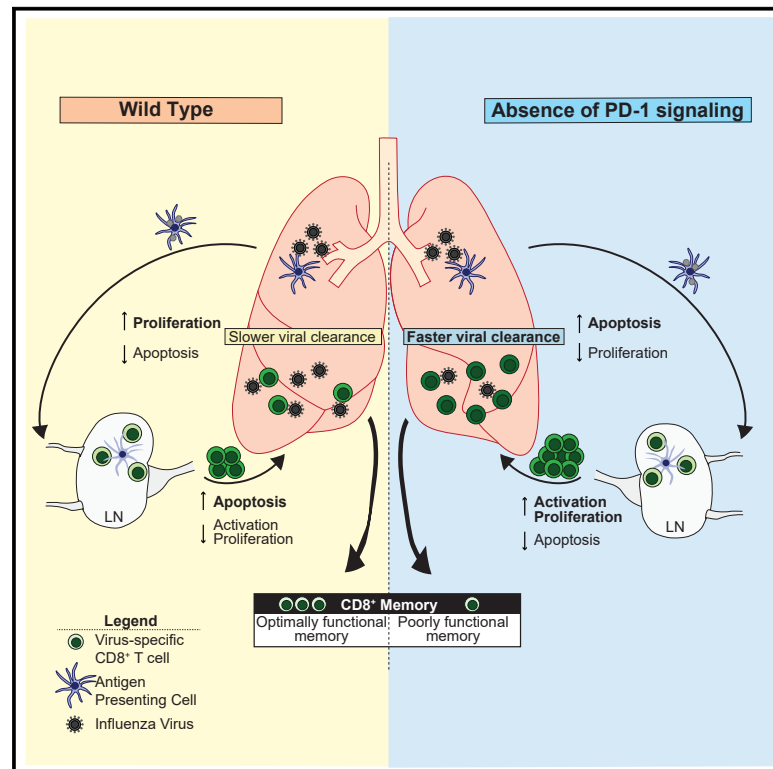

## Authors

Kristen E. Pauken, Jernej Godec, Pamela M. Odorizzi, ..., W. Nicholas Haining, E. John Wherry, Arlene H. Sharpe

## Correspondence

wherry@pennmedicine.upenn.edu (E.J.W.), arlene\_sharpe@hms.harvard.edu (A.H.S.)

## In Brief

The role of PD-1 in memory development is poorly understood. Here, Pauken et al. show that constitutive loss of PD-1 during acute infection causes overactivation of CD8<sup>+</sup> T cells during the effector phase and impairs memory and recall responses. These data indicate PD-1 is required for optimal memory.

## Highlights

- Early loss of PD-1 leads to overactivation of CD8<sup>+</sup> T cells during acute infection
- Mice constitutively lacking PD-1 or PD-L develop impaired CD8<sup>+</sup> T cell memory
- Cell-intrinsic PD-1 signals suppress effector cell expansion and promote memory
- Timing of PD-1 blockade determines impact on memory generation

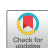

## Article

# The PD-1 Pathway Regulates Development and Function of Memory CD8<sup>+</sup> T Cells following Respiratory Viral Infection

Kristen E. Pauken,<sup>1,8</sup> Jernej Godec,<sup>1,2,8</sup> Pamela M. Odorizzi,<sup>3,8</sup> Keturah E. Brown,<sup>1</sup> Kathleen B. Yates,<sup>2</sup> Shin Foong Ngiow,<sup>3</sup> Kelly P. Burke,<sup>1,4</sup> Seth Maleri,<sup>1</sup> Shannon M. Grande,<sup>1</sup> Loise M. Francisco,<sup>1</sup> Mohammed-Alkhatim Ali,<sup>3</sup> Sabrina Imam,<sup>2</sup> Gordon J. Freeman,<sup>4</sup> W. Nicholas Haining,<sup>2,5,6</sup> E. John Wherry,<sup>3,9,\*</sup> and Arlene H. Sharpe<sup>1,5,7,9,10,\*</sup>

<sup>1</sup>Department of Immunology, Blavatnik Institute, Harvard Medical School, and Evergrande Center for Immunologic Diseases, Harvard Medical School and Brigham and Women's Hospital, Boston, MA 02115, USA

<sup>2</sup>Department of Pediatric Oncology, Dana-Farber Cancer Institute, Boston, MA 02115, USA

<sup>3</sup>Institute for Immunology and Department of Systems Pharmacology and Translational Therapeutics, University of Pennsylvania Perelman School of Medicine, Philadelphia, PA 19104, USA

<sup>4</sup>Department of Medical Oncology, Dana-Farber Cancer Institute and Harvard Medical School, Boston, MA 02115, USA

<sup>5</sup>Broad Institute of MIT and Harvard, Cambridge, MA 02142, USA

<sup>6</sup>Division of Hematology/Oncology, Children's Hospital, Harvard Medical School, Boston, MA 02115, USA

<sup>7</sup>Department of Pathology, Brigham and Women's Hospital, Boston, MA 02115, USA

<sup>8</sup>These authors contributed equally

<sup>9</sup>These authors contributed equally

<sup>10</sup>Lead Contact

\*Correspondence: [wherry@penmedicine.upenn.edu](mailto:wherry@penmedicine.upenn.edu) (E.J.W.), [arlene\\_sharpe@hms.harvard.edu](mailto:arlene_sharpe@hms.harvard.edu) (A.H.S.)

<https://doi.org/10.1016/j.celrep.2020.107827>

## SUMMARY

The PD-1 pathway regulates dysfunctional T cells in chronic infection and cancer, but the role of this pathway during acute infection remains less clear. Here, we demonstrate that PD-1 signals are needed for optimal memory. Mice deficient in the PD-1 pathway exhibit impaired CD8<sup>+</sup> T cell memory following acute influenza infection, including reduced virus-specific CD8<sup>+</sup> T cell numbers and compromised recall responses. PD-1 blockade during priming leads to similar differences early post-infection but without the defect in memory formation, suggesting that timing and/or duration of PD-1 blockade could be tailored to modulate host responses. Our studies reveal a role for PD-1 as an integrator of CD8<sup>+</sup> T cell signals that promotes CD8<sup>+</sup> T cell memory formation and suggest PD-1 continues to fine-tune CD8<sup>+</sup> T cells after they migrate into non-lymphoid tissues. These findings have important implications for PD-1-based immunotherapy, in which PD-1 inhibition may influence memory responses in patients.

## INTRODUCTION

The development of effector and memory CD8<sup>+</sup> T cells requires coordinated signals from the T cell receptor (TCR) (signal 1), costimulation (signal 2), and inflammation (signal 3) (Curtis et al., 1999). The quantity and quality of the three signals can affect CD8<sup>+</sup> T cell activation, but how such signals regulate memory CD8<sup>+</sup> T cell differentiation remains incompletely understood (Chang et al., 2014). Signal 2 encompasses many costimulatory and coinhibitory pathways. Costimulatory signals such as CD28 and inducible T cell costimulator (ICOS or CD278) augment T cell survival, function, and metabolic activity and sustain T cell responses (Francisco et al., 2010; Chen and Flies, 2013). Conversely, coinhibitory receptors such as cytotoxic T lymphocyte associated protein-4 (CTLA-4 or CD152) and programmed death-1 (PD-1 or CD279) dampen these positive signals. The importance of signal 2 has been highlighted by the application of antibodies blocking coinhibitory receptors for treating cancer

and chronic infections (Barber et al., 2006; Day et al., 2006; Brahmer et al., 2012; Topalian et al., 2012, 2015; Page et al., 2014; Sharpe and Pauken, 2018). PD-1 pathway blockade has been approved by the U.S. Food and Drug Administration (FDA) for at least 20 types of tumors, including melanoma, non-small cell lung cancer, renal cell carcinoma, Hodgkin's lymphoma, bladder cancer, and microsatellite instability high or mismatch-repair-deficient solid tumors, and this number continues to grow (Sharpe and Pauken, 2018; Pardoll, 2012; Topalian et al., 2015). Considering the increasing use of PD-1 checkpoint blockade alone or in combination with other therapies (Chen and Mellman, 2017), an understanding of how the PD-1 pathway regulates immunological memory has significant therapeutic relevance. However, how this pathway regulates CD8<sup>+</sup> memory T cell differentiation, function, and survival remains poorly understood.

In addition to the well-established role of the PD-1 pathway in regulating exhausted CD8<sup>+</sup> T cells, PD-1 is expressed by all

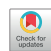

T cells during activation (Sharpe and Pauken, 2018). Consequently, PD-1 is critically positioned to shape the ensuing effector response and, by extension, the memory response. Previous work showed that a lack of PD-1:programmed death ligand (PD-L) signals during some primary infections resulted in more robust effector T cell responses (Frebel et al., 2012; Odorizzi et al., 2015; Ahn et al., 2018) and enhanced CD8<sup>+</sup> T cell memory and/or skewed T cells toward a central memory phenotype (Allie et al., 2011; Ahn et al., 2018). In addition, the secondary expansion of unhelped memory CD8<sup>+</sup> T cells was increased by PD-1 blockade (Fuse et al., 2009). However, these studies focused mainly on early time points during memory development, and further work is needed to fully understand how the timing and/or duration of loss of PD-1 signals affect memory responses. For example, other studies have shown that loss of PD-1 signals during acute infection can reduce, rather than augment, effector and/or memory T cell responses (Rowe et al., 2008; Talay et al., 2009; Yao et al., 2009; Xu et al., 2013). Consequently, additional studies are needed to clarify how the PD-1 pathway shapes the development of effector and memory CD8<sup>+</sup> T cells following acute infections.

Here we examined the role of the PD-1 pathway in effector and memory CD8<sup>+</sup> T cell differentiation during influenza virus infection using mice lacking PD-1 (PD-1 knockout [KO]) or both ligands, PD-L1 (B7-H1) and PD-L2 (B7-DC) (PD-L1/L2 double knockout [DKO]), or experiencing PD-1 pathway blockade. Lack of PD-1:PD-L signals in the whole animal led to compromised CD8<sup>+</sup> T cell memory, including reduced cell numbers and impaired secondary responses. There were major cell-intrinsic alterations in CD8<sup>+</sup> T cell memory, because PD-1 KO CD8<sup>+</sup> T cells transferred into wild-type (WT) mice exhibited similar defects in memory formation. PD-1 mediates these effects by controlling key transcriptional pathways involved in the durability of CD8<sup>+</sup> T cell memory, signaling, and cell cycle. Importantly, blocking the PD-1 pathway only during the priming and effector phase of infection induced phenotypic changes in CD8<sup>+</sup> T cells similar to those seen in PD-L1/L2 DKO mice at day 8 post-infection (p.i.) but did not result in the severe memory defect observed in mice with constitutive PD-1 deficiency. These data demonstrate a role for PD-1 in tempering the strength of initial activation to promote optimal CD8<sup>+</sup> T cell memory formation and highlight the importance of timing and/or duration of loss of PD-1 signals in regulating memory formation.

## RESULTS

### Increased Proliferation and Death of CD8<sup>+</sup> T Cells without PD-1 Signaling

To investigate the role of the PD-1 pathway during acute H3N2 influenza virus X31 infection in mice, we first assessed the expression of PD-1, PD-L1, and PD-L2 on both hematopoietic and non-hematopoietic cells in the lung during the first 12 days p.i. We used a strain of X31 engineered to express the GP<sub>33-41</sub> epitope from lymphocytic choriomeningitis virus (LCMV) (called X31-GP33) to allow tracking of D<sup>b</sup>GP<sub>33-41</sub><sup>+</sup> CD8<sup>+</sup> T cells (Laidlaw et al., 2013). PD-L1 and PD-L2 expression increased substantially during X31-GP33 infection on hematopoietic antigen-presenting cells (APCs), including dendritic cells (DCs), macro-

phages, and B cells, and PD-L1 and PD-L2 were expressed on some non-hematopoietic cells, such as epithelial cells (Figure S1). Expression of PD-L1 and PD-L2 peaked between day 3 and day 6 p.i. on lung APCs and EpCAM<sup>+</sup> lung epithelial cells (Figures S1B–S1F). PD-L1, but not PD-L2, was expressed on CD31<sup>+</sup> lung endothelial cells and peaked between day 3 and day 8 p.i.; PD-L1 remained significantly elevated even at day 12 p.i. on alveolar macrophages and lung endothelial cells (Figures S1B, S1D, and S1E). PD-1 was rapidly upregulated on CD4<sup>+</sup> and CD8<sup>+</sup> T cells in the lung, with high levels of expression maintained at day 12 p.i. (Figure S2A). Upregulation of PD-1 was also observed on splenic CD4<sup>+</sup> and CD8<sup>+</sup> T cells, albeit to a lesser extent than in the lung (Figures S2A and S2B). Thus, dynamic changes in PD-1, PD-L1, and PD-L2 expression occur in the respiratory tract during influenza infection, suggesting that the PD-1 pathway may regulate CD8<sup>+</sup> T cell effector and/or memory responses in this setting.

To investigate the impact of the PD-1 pathway on the generation of effector T cell responses, WT or PD-L1/L2 DKO mice were infected with X31-GP33 and virus-specific CD8<sup>+</sup> T cells were examined from day 8 to day 10 p.i. Although all mice had similar frequencies of influenza-specific CD8<sup>+</sup> T cells in the lung, there was a significant increase in the absolute number of virus-specific CD8<sup>+</sup> T cells in PD-L1/L2 DKO mice for all three epitopes examined (D<sup>b</sup>NP<sub>366-374</sub>, D<sup>b</sup>PA<sub>224-223</sub>, and D<sup>b</sup>GP<sub>33-41</sub>) (Figure 1A). This finding suggested that loss of PD-1 did not alter immunodominance during the effector phase of the response but rather affected the magnitude of the CD8<sup>+</sup> T cell response in the lung. At day 10 p.i., there were no significant differences in CD8<sup>+</sup> T cell functionality or quality of cytokine-producing cells in the lungs following *ex vivo* stimulation with NP<sub>366-374</sub> peptide (Figure S3A). However, the increase in absolute number of virus-specific CD8<sup>+</sup> T cells at these early time points corresponded with better viral control: PD-1 KO and PD-L1/L2 DKO mice lost less weight during primary X31-GP33 infection and contained less viral RNA per nanogram (ng) of lung than WT control mice (Figures S3B and S3C). Collectively, these data suggest that effector responses were enhanced during primary X31-GP33 infection in PD-1 pathway-deficient mice.

To begin to investigate the mechanisms responsible for the quantitative differences in effector CD8<sup>+</sup> T cells generated in the absence of PD-1 pathway signals, we performed microarray analysis of D<sup>b</sup>PA<sub>224-223</sub> and D<sup>b</sup>GP<sub>33-41</sub> CD8<sup>+</sup> T cells from the lungs of WT and PD-L1/L2 DKO mice at day 8 p.i. Gene set enrichment analysis (GSEA) using Gene Ontology (GO) (Ashburner et al., 2000; Subramanian et al., 2005) revealed that most significantly enriched pathways ( $p < 0.001$ , false discovery rate [FDR]  $< 0.001$ ) were related to cell division (Figures 1B and 1C; Figure S2C). Unexpectedly, WT cells were enriched for cell-cycle pathways, whereas PD-L1/L2 DKO cells appeared to be exiting cell cycle (Figure 1C). We further analyzed three representative pathways enriched in the WT cells: mitosis, spindle assembly, and DNA replication. Among those genes upregulated in WT relative to PD-L1/L2 DKO CD8<sup>+</sup> T cells, most were members of these pathways (Figure S2C). Flow cytometric analysis supported this phenotype. At day 8 p.i., a lower frequency of virus-specific CD8<sup>+</sup> T cells expressed Ki-67 in the lung of PD-L1/L2 DKO mice compared with WT mice, but a higher frequency

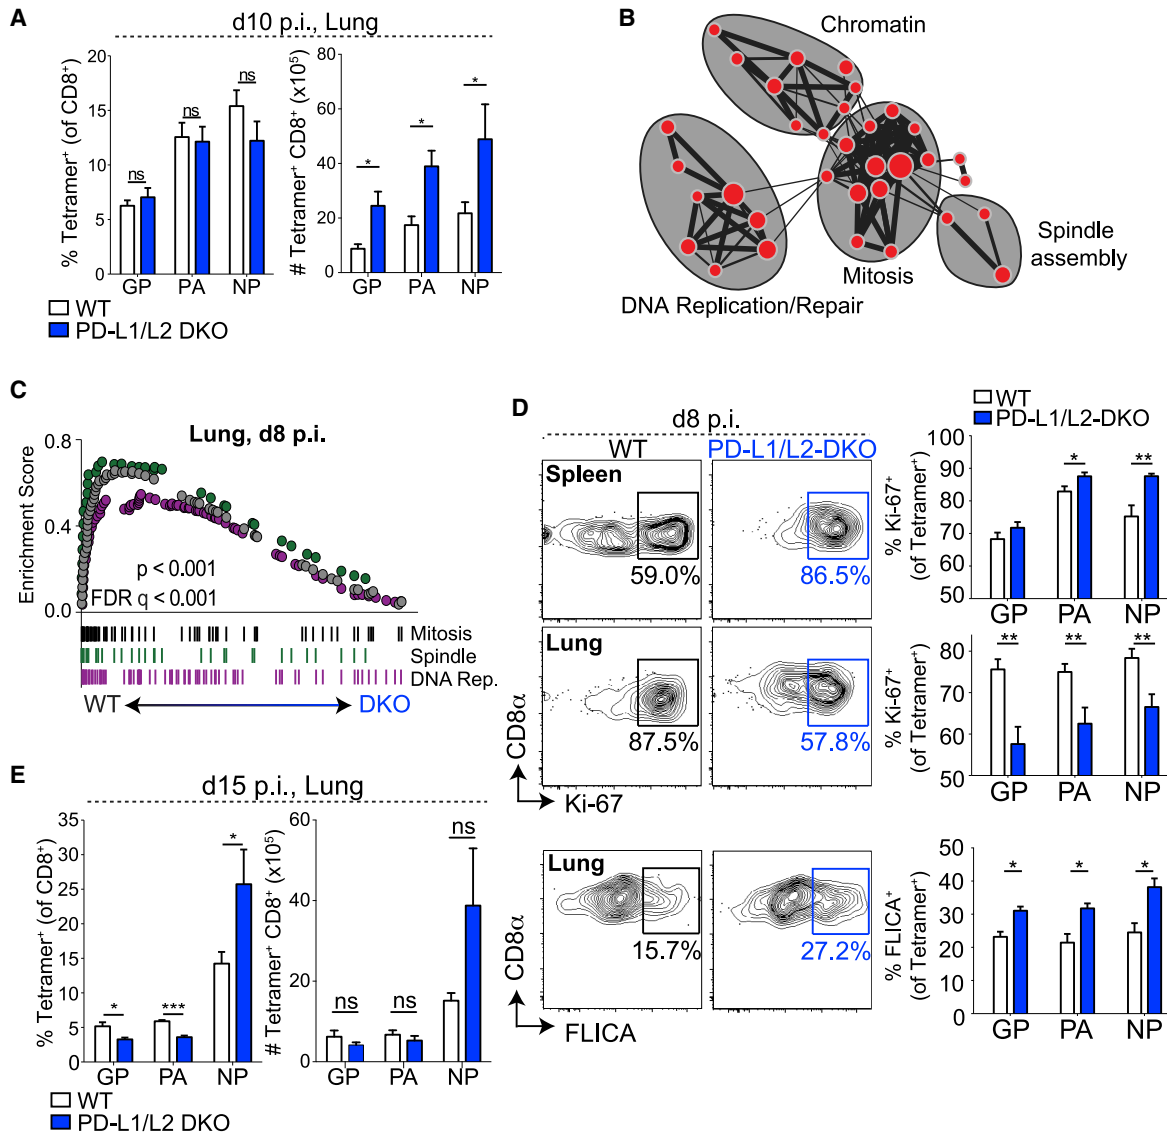

**Figure 1. Altered Effector CD8<sup>+</sup> T Cell Expansion and Contraction in the Absence of PD-1**

(A) Frequencies (left) and numbers (right) of indicated tetramer<sup>+</sup> CD8<sup>+</sup> T cells in the lungs of WT and PD-L1/L2 DKO mice at day 10 after X31-GP33 infection. (B) Significantly enriched (FDR < 0.01) gene sets in WT CD8<sup>+</sup> T cells clustered based on gene member overlap and annotated for the biological states/processes they represent. (C) Representative GO terms enriched in microarray data from D<sup>b</sup>GP<sub>33-41</sub><sup>+</sup> and D<sup>b</sup>PA<sub>224-233</sub><sup>+</sup> CD8<sup>+</sup> T cells from lungs of WT versus PD-L1/L2 DKO mice at day 8 p.i. (D) Flow cytometric analysis of Ki-67 expression by D<sup>b</sup>NP<sub>366-374</sub><sup>+</sup> CD8<sup>+</sup> T cells from the spleen (top) and lung (middle) of WT and PD-L1/L2 DKO mice at day 8 p.i. Numbers indicate the fraction of Ki-67<sup>+</sup> D<sup>b</sup>NP<sub>366-374</sub><sup>+</sup> CD8<sup>+</sup> T cells. Representative plots are shown on the left, and a summary of Ki-67<sup>+</sup> cells is shown on the right. Bottom, FLICA staining on D<sup>b</sup>NP<sub>366-374</sub><sup>+</sup> lung CD8<sup>+</sup> T cells from WT and PD-L1/L2 DKO mice at day 8 p.i. Numbers indicate the fraction of FLICA<sup>+</sup> D<sup>b</sup>NP<sub>366-374</sub><sup>+</sup> CD8<sup>+</sup> T cells based on unstained controls. Representative plots are shown on the left, and a summary of numbers is shown on the right. (E) Frequencies (left) and numbers (right) of indicated tetramer<sup>+</sup> CD8<sup>+</sup> T cells in the lungs of WT and PD-L1/L2 DKO mice at day 15 after X31-GP33 infection. Data are representative of 2–3 independent experiments with 4–5 mice per group and represented as mean ± SEM. Significance was assessed using Student's t test; ns, not significant; \*p < 0.05, \*\*p < 0.01, \*\*\*p < 0.001. GP, D<sup>b</sup>GP<sub>33-41</sub> tetramer; PA, D<sup>b</sup>PA<sub>224-233</sub> tetramer; NP, D<sup>b</sup>NP<sub>366-374</sub> tetramer. See Figures S1–S3 for supporting data.

expressed Ki-67 in the spleen in PD-L1/L2 DKO mice (Figure 1D). These data suggest that virus-specific CD8<sup>+</sup> T cells in PD-L1/L2 DKO mice had started to exit the cell cycle in the lung and proliferated more in the secondary lymphoid organs, whereas the WT

CD8<sup>+</sup> T cells were at an earlier phase of the response in which the cells that had proliferated recently trafficked to the lung and the cells were still entering the cycle in the spleen. This finding was consistent with the increased numbers of virus-specific CD8<sup>+</sup>

T cells observed in PD-L1/L2 DKO in the lung compared with WT mice at day 10 (Figure 1A). Concomitantly, a higher frequency of virus-specific CD8<sup>+</sup> T cells in the lung also showed active caspase staining (with Fluorochrome Inhibitor of Caspases [FLICA] reagent) in PD-L1/L2 DKO mice (Figure 1D), suggesting that these cells were more susceptible to death than their WT counterparts. The decrease in proliferation and increase in cell death in the absence of PD-1 signals in the lung at day 8 p.i. led to a more significant contraction of influenza-specific CD8<sup>+</sup> T cells at day 15 p.i. for the subdominant epitopes (D<sup>b</sup>PA<sub>224–233</sub> and D<sup>b</sup>GP<sub>33–41</sub>) (Figure 1E). These data suggest a link between PD-1:PD-L deficiency and cell cycle during early activation of virus-specific CD8<sup>+</sup> T cells in the lung during influenza infection, and early excessive proliferation correlated with increased cell death during the contraction phase in PD-L1/L2 DKO mice.

### Impaired Virus-Specific CD8<sup>+</sup> T Cell Memory in Mice Lacking PD-1 Signaling

We hypothesized that these early changes in PD-L1/L2 DKO mice would affect the formation of CD8<sup>+</sup> T cell memory responses. To test this hypothesis, we first assessed the ratio of PD-L1/L2 DKO:WT virus-specific CD8<sup>+</sup> T cells in the lung over time following X31-GP33 infection (Figure 2A). From day 8 to day 10 p.i., all three influenza epitopes showed a higher number in PD-L1/L2 DKO compared with WT, consistent with increased effector expansion (Figures 1A and 2A). However, at day 15 and later, PD-L1/L2 DKO showed a greater contraction of the D<sup>b</sup>PA<sub>224–233</sub> and D<sup>b</sup>GP<sub>33–41</sub> epitopes (Figure 2A) compared with WT control mice. The immunodominant (D<sup>b</sup>NP<sub>366–374</sub>) CD8<sup>+</sup> T cell response displayed slower kinetics in this deterioration (Figure 2A) but eventually (day 35<sup>+</sup> p.i.) showed the same trend as the subdominant epitopes, with WT outnumbering the DKO CD8<sup>+</sup> T cells (Figure 2A). Thus, PD-1 pathway deficiency led to an initial increase in virus-specific CD8<sup>+</sup> T cells that eroded over time.

Consistent with the steeper decline of influenza-specific CD8<sup>+</sup> T cells in DKO during the contraction phase of influenza, the frequencies and numbers of virus-specific CD8<sup>+</sup> T cells were reduced in the lungs of PD-L1/L2 DKO and PD-1 KO mice compared with WT at day 60<sup>+</sup> p.i. (Figures 2B and 2C). Although the magnitude of the difference was greater for the subdominant (D<sup>b</sup>PA<sub>224–233</sub>) than the immunodominant (D<sup>b</sup>NP<sub>366–374</sub>) response, both responses showed impaired memory formation (Figures 2B and 2C). A similar decrease in CD8<sup>+</sup> T cell frequencies was observed in the spleen, mediastinal (lung draining) lymph node (dLN), and bone marrow (Figure S4A). In addition, lower frequencies of cytokine-producing CD8<sup>+</sup> T cells were detected at day 60<sup>+</sup> p.i. following *ex vivo* peptide stimulation in PD-L1/L2 DKO and PD-1 KO mice (Figure 2D), indicating a qualitative defect in the memory response in these mice.

To test whether PD-1:PD-L interactions during primary viral infection affected secondary responses, we rechallenged X31-GP33-immune mice with the heterotypic strain of influenza PR8, which also expressed the D<sup>b</sup>GP<sub>33–41</sub> epitope from LCMV (called PR8-GP33) (Mueller et al., 2010). Because neutralizing antibodies do not cross-react between these viruses, memory CD8<sup>+</sup> T cells play a central role in protective immunity (Liang et al., 1994; Flynn et al., 1998; Mueller et al., 2010). PD-L1/L2

DKO mice had significantly increased viral titers in the lung 3.5 days following rechallenge (Figure 2E) and lost more weight than WT mice (Figure 2F). Lower frequencies and total numbers of influenza-specific, as well as cytokine-producing, CD8<sup>+</sup> T cells (Figure 2G; Figure S4B) were also observed in the lung at day 3.5 post-rechallenge in PD-L1/L2 DKO mice compared with WT mice. However, by day 7 after rechallenge, CD8<sup>+</sup> T cell responses in the lungs were comparable in WT and PD-L1/L2 DKO mice and the virus was cleared in the PD-L1/L2 DKO mice (Figures S4C–S4F). Similar defects in viral control were observed in PD-1 KO mice (Figures 2E and 2F). Thus, PD-1 pathway deficiency resulted in compromised memory CD8<sup>+</sup> T cells that failed to mount optimal recall responses. This defect manifested as delayed viral clearance and increased weight loss (Figures 2E and 2F; Figure S4C). Altogether, these data indicate a key role for the PD-1 pathway in regulating the development of optimal CD8<sup>+</sup> T cell memory.

### Cell-Intrinsic Regulation of CD8<sup>+</sup> T Cell Memory Differentiation by PD-1

The compromised CD8<sup>+</sup> T cell memory responses in PD-1 pathway-deficient mice could result from CD8<sup>+</sup> T cell-intrinsic functions of PD-1 or extrinsic effects. Because PD-1 pathway-deficient mice cleared primary X31-GP33 virus infection more rapidly than WT mice (Figure S3C), and previous work identified a critical role for antigen in the development and maintenance of CD8<sup>+</sup> T cell memory in the lung (Jelley-Gibbs et al., 2005; Zammit et al., 2006; Lee et al., 2011; McMaster et al., 2018), the altered CD8<sup>+</sup> T cell dynamics in this setting could be related to enhanced clearance of influenza infection during primary infection. To circumvent these issues and to interrogate CD8<sup>+</sup> T cell-intrinsic mechanisms of PD-1-mediated regulation, we cotransferred equal numbers of WT and PD-1 KO P14 TCR transgenic CD8<sup>+</sup> T cells (recognizing the D<sup>b</sup>GP<sub>33–41</sub> epitope) into WT mice followed by infection with X31-GP33 virus. This approach did not alter viral load at day 8 p.i. compared with mice without P14 cells (Figure S5A) and enabled direct comparison of WT and PD-1 KO CD8<sup>+</sup> T cells in the same environment while controlling for precursor frequency, TCR repertoire, viral control, and influenza pathogenesis. Consistent with findings in germline KO mice, the frequency and numbers of PD-1 KO P14 cells were significantly higher than WT P14 cells in the lung and spleen at day 7 p.i. (Figure 3A), with similar trends in the blood and dLN (Figure S5B). The higher frequency of PD-1 KO P14 cells during primary X31-GP33 virus infection was associated with increased bromodeoxyuridine (BrdU) incorporation in the spleen and dLN, but not the lung (Figure 3B), indicating that PD-1 regulates CD8<sup>+</sup> T cell proliferation in a cell-intrinsic manner in secondary lymphoid organs.

Similar to global PD-1 pathway KO mice, PD-1 KO P14 cells in WT mice were more prone to cell death in the lung, as shown by increased FLICA staining at day 10 p.i. (Figure S5C). PD-1 KO P14 cells also underwent a more progressive contraction and were less abundant than WT P14 cells in the lung and spleen after 3 months (Figure 3C; Figure S5D). Moreover, PD-1 KO memory P14 cells showed significantly reduced interferon gamma (IFN $\gamma$ ) and tumor necrosis factor alpha (TNF- $\alpha$ ) coproduction and a decreased amount of IFN $\gamma$  made per cell compared with



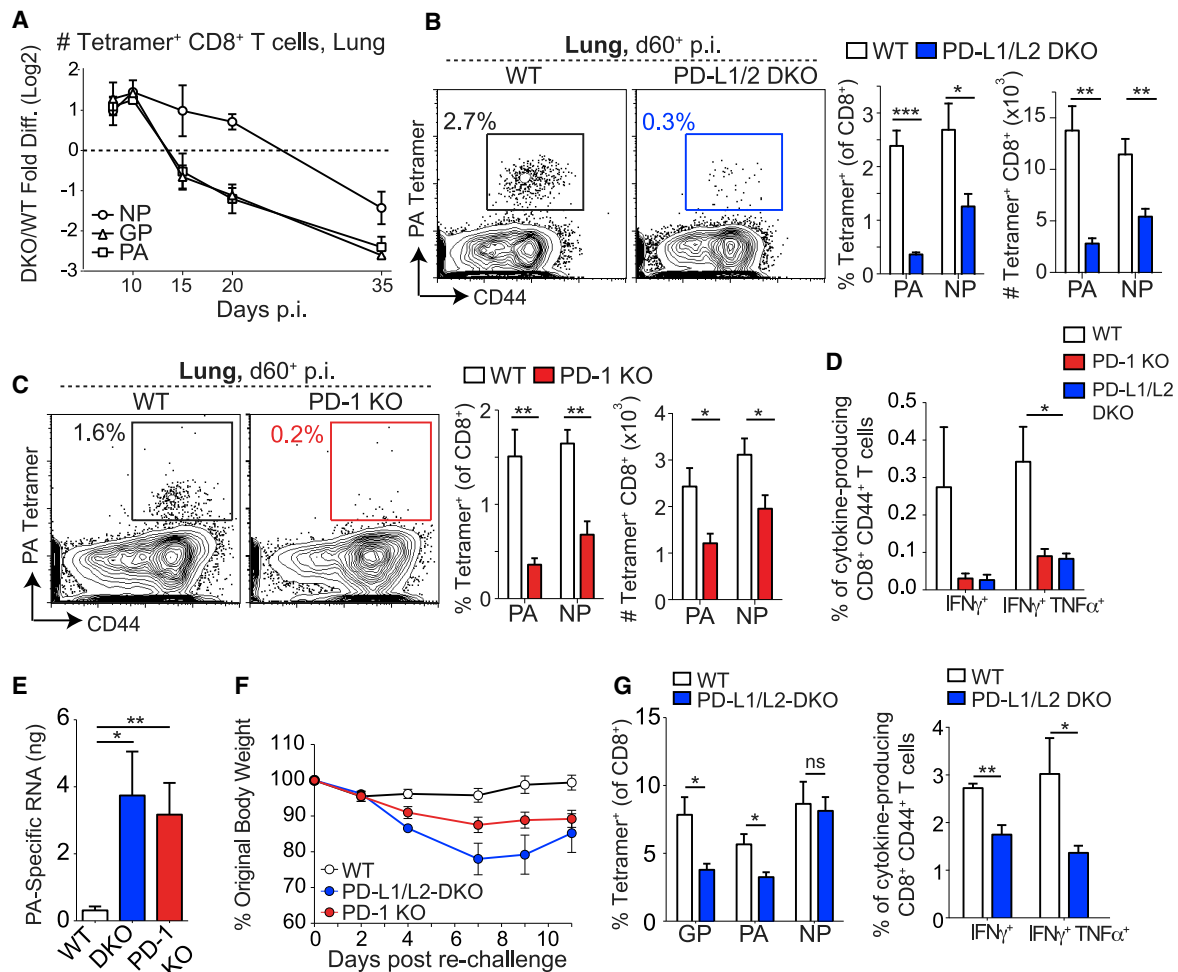

**Figure 2. CD8<sup>+</sup> T Cell Memory Is Impaired in PD-1 Pathway-Deficient Mice**

(A) Ratio of numbers of influenza-specific CD8<sup>+</sup> T cells in the lungs of PD-L1/L2 DKO and WT mice over time after X31-GP33 infection. The log<sub>2</sub> fold change of the ratio of DKO to WT cells was plotted over time. Here, a value of zero indicates a 1:1 ratio of DKO to WT, a value greater than zero indicates more DKO than WT, and a value less than zero indicates more WT than DKO.

(B and C) Representative plots (left) show the frequency of D<sup>b</sup>PA<sub>224–233</sub><sup>+</sup> CD8<sup>+</sup> T cells in the lungs of X31-GP33-infected WT or PD-L1/L2 DKO mice (B) and WT or PD-1 KO mice (C) at day 60<sup>+</sup> p.i. Numbers on plots indicate the percentages of D<sup>b</sup>PA<sub>224–233</sub><sup>+</sup> cells of the CD8<sup>+</sup> population. Percentages and numbers of D<sup>b</sup>PA<sub>224–233</sub><sup>+</sup> and D<sup>b</sup>NP<sub>366–374</sub><sup>+</sup> T cells are summarized on the right.

(D) Summary of frequencies of cytokine-producing CD8<sup>+</sup> CD44<sup>+</sup> T cells from the lungs of WT, PD-L1/L2 DKO, and PD-1 KO mice at day 60<sup>+</sup> p.i. stimulated *ex vivo* with NP<sub>366–374</sub> peptide.

(E) Influenza viral titers in the lung at day 3.5 p.i. after PR8-GP33 challenge in mice that had been infected with X31-GP33 at least 60 days before challenge.

(F) Weight loss in WT, PD-L1/L2 DKO, and PD-1 KO X31-GP33-immune mice (day 60<sup>+</sup>) following rechallenge with PR8-GP33.

(G) Frequencies of tetramer<sup>+</sup> CD8<sup>+</sup> T cells (left) and cytokine-producing CD8<sup>+</sup> CD44<sup>+</sup> T cells (right) following stimulation *ex vivo* with NP<sub>366–374</sub> peptide in lungs of X31-GP33-immune WT and PD-L1/L2 DKO mice at day 3.5 following rechallenge with PR8-GP33.

Data are representative of 3–5 independent experiments with 4–5 mice per group and represented as mean ± SEM. Significance was assessed using Student's t test; ns, not significant; \*p < 0.05, \*\*p < 0.01, \*\*\*p < 0.001. See Figure S4 for supporting data.

WT cells (Figure 3D; Figure S5E). Hence, although the kinetics differed, these results were consistent with the quantitative and qualitative memory attrition observed in the global KO mice. There were significant, albeit small, differences in KLRG1, CD127, and CD122 expression in lung at days 8, 20, and 30 p.i. (Figures 3E and 3F). However, these changes were subtle compared with the quantitative (Figure 3C) and qualitative (Figure 3D) defects in memory formation observed. These data highlight the importance of functional readouts to determine re-

sidual memory capacity during acute infection. Considering this, we assessed the per-cell capacity of WT versus PD-1 KO P14 memory cells to mount a productive recall response following rechallenge with PR8-GP33. Here, PD-1 KO P14 memory cells displayed substantially impaired secondary expansion compared with WT P14 cells in the same mice (Figure 3G). These results point to a key cell-intrinsic function for PD-1 signals in regulating CD8<sup>+</sup> T cell proliferation and survival during the acute phase of infection and subsequent optimal CD8<sup>+</sup> T cell memory formation.

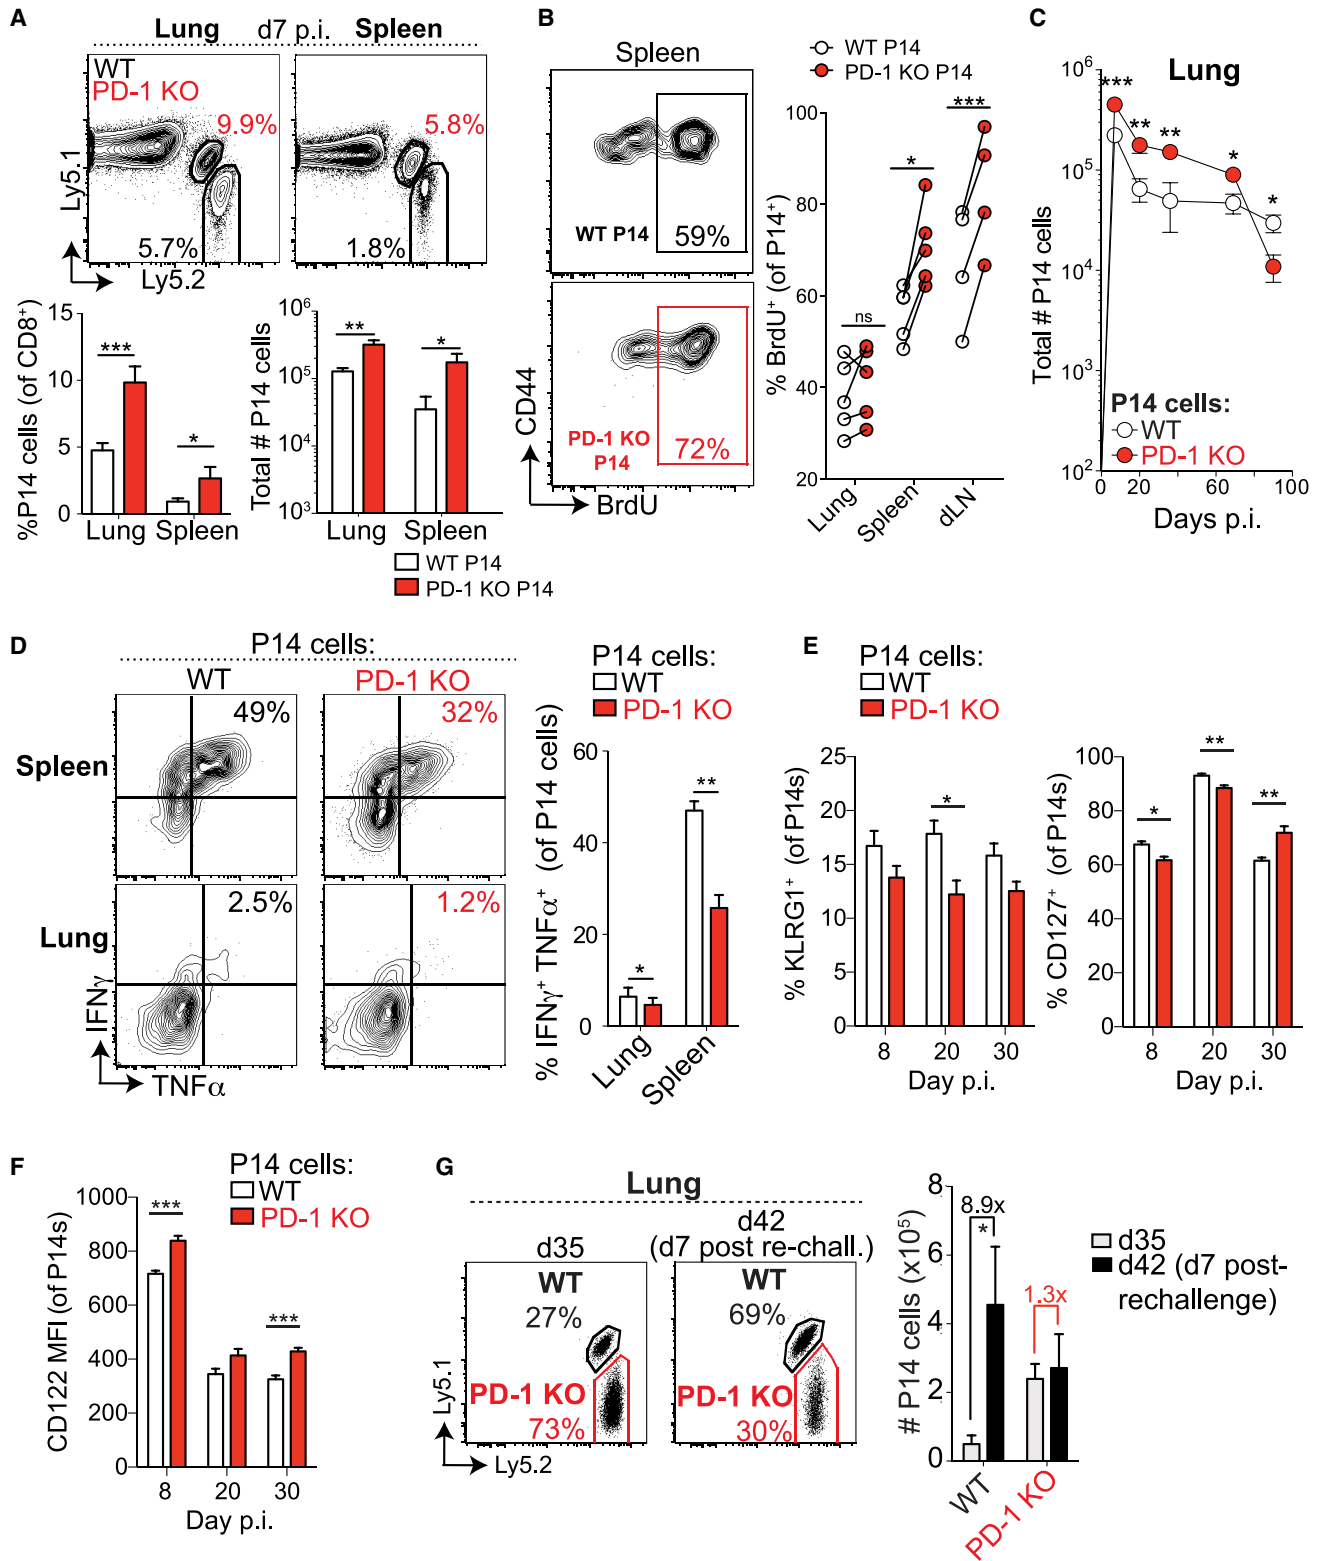

**Figure 3. Cell-Intrinsic Defect in CD8<sup>+</sup> T Cell Memory in the Absence of PD-1**

(A) (top) Representative plots of WT (black) and PD-1 KO (red) P14 cells in the lung and spleen 7 days after X31-GP33 infection. Numbers indicate frequencies of P14 cells as percentages of CD8<sup>+</sup> T cells (top). Summaries of frequencies and numbers of P14 cells (bottom).

(legend continued on next page)

Although PD-1 KO P14 cells showed a similar memory defect in WT hosts as virus-specific CD8<sup>+</sup> T cells in intact PD-1 pathway KO mice, we did note a difference in the kinetics of the quantitative memory defect. This difference could result from variations in cell-extrinsic factors such as viral control (Figures S3C and S5A) or cell-intrinsic factors such as the resting state of naive T cell populations in these mice. To evaluate this issue, we examined CD8<sup>+</sup> T cell function in the steady state of unmanipulated PD-L1/L2 DKO and PD-1 KO mice and compared this to PD-1 KO P14 cells (Figure S6). There were no significant differences in the numbers of CD8<sup>+</sup> T cells in the spleen or dLNs of WT versus PD-L1/L2 DKO or PD-1 KO mice, and most T cells displayed a naive phenotype (Figures S6A and S6B; data not shown). Both PD-L1/L2 DKO and PD-1 KO mice showed a subtle but significant increase in frequencies of CD44<sup>high</sup> CD8<sup>+</sup> T cells, and this effect was more pronounced in PD-1 KO mice (Figures S6A and S6B). Moreover, most markers of recent activation (including CD69, CD25, Ki-67, and KLRG1) were uniformly low in both PD-L1/L2 DKO and PD-1 KO mice and comparable to WT mice, suggesting no ongoing activation of CD8<sup>+</sup> T cells in the steady state (Figures S6C and S6D). However, in unimmunized PD-1 KO mice (but not PD-L1/L2 DKO mice), both CD44<sup>low</sup> and CD44<sup>high</sup> CD8<sup>+</sup> T cells showed increased CXCR3 expression compared with WT mice (Figures S6E–S6G). Restricting TCR specificity eliminated this effect, because CXCR3 expression was similar in PD-1 KO P14 cells and WT P14 cells, as were levels of other activation markers, including Ki-67, Tim-3, and CD160 (Figure S6H). Considering the similar defects in memory CD8<sup>+</sup> T cell responses in intact PD-1 KO and PD-L1/L2 DKO mice, and in PD-1 KO P14 CD8<sup>+</sup> T cells transferred into WT mice, and that elevated CXCR3 expression only is seen in non-TCR transgenic PD-1 KO mice, we think it is unlikely that elevated CXCR3 expression in the PD-1 KO mouse influences the memory phenotype observed during acute influenza infection.

### PD-1 Restrains CD8<sup>+</sup> T Cell Effector and Memory Responses to Multiple Acute Respiratory Infections

To investigate whether PD-1 plays a similar role on CD8<sup>+</sup> T cells during other acute respiratory infections, we cotransferred equal numbers of WT and PD-1 KO P14 cells into WT mice followed by intranasal infection with LCMV Armstrong, vaccinia virus-GP33 (VV-GP33) or influenza virus (PR8-GP33). All viruses were administered intranasally to investigate the role of PD-1 in regulating memory CD8<sup>+</sup> T cell formation in the lung. PD-1 deficiency resulted in increased frequency of P14 cells in the blood during the effector phase in all infections (Figure 4A). However, substantial attrition of virus-specific CD8<sup>+</sup> T cell responses occurred over

time (Figure 4A). The fold contraction of the PD-1 KO P14 population after the effector phase was substantially greater in each infection, indicating less efficient per-cell memory formation in the absence of PD-1 (Figure 4B). At day 100<sup>+</sup> p.i., PD-1 KO P14 cells produced less IFN $\gamma$  and TNF- $\alpha$  compared with WT P14 cells, with the most significant results observed during VV-GP33 and PR8-GP33 infections (Figures 4C and 4D). Thus, PD-1 can restrain early expansion of virus-specific CD8<sup>+</sup> T cells during multiple acute respiratory infections, profoundly affecting memory responses.

### Temporally Restricting PD-1 Pathway Deficiency to the Priming Phase of Infection Does Not Result in the Memory Defect Observed in Constitutive PD-1 Pathway-Deficient Mice

The results described earlier with constitutive PD-1 pathway deficiency suggested that absence of PD-1 signaling impaired memory formation. We next asked whether temporal loss of PD-1 signaling during the priming and effector phase of infection resulted in a similar memory defect. We administered anti-PD-1 blocking antibody to WT B6 mice early during X31-GP33 infection (day –1 through 8), and compared effector (day 8 p.i.) and memory (day 60<sup>+</sup> p.i.) responses to isotype control (Rat Immunoglobulin (Ig)G2a)-treated WT B6 mice or PD-L1/L2 DKO mice as controls. During the effector phase (day 8 p.i.), significant differences in the frequency and number of D<sup>b</sup>GP<sub>33–41</sub><sup>+</sup> CD8<sup>+</sup> T cells in the lung were not observed (data not shown). Phenotypically, both PD-L1/L2 DKO mice and anti-PD-1-treated mice showed a significant decrease in the frequency of KLRG1<sup>+</sup> CD127<sup>–</sup> D<sup>b</sup>GP<sub>33–41</sub><sup>+</sup> T cells in the lung at day 8 p.i. (Figure 5A), suggesting that blockade of PD-1 had effects similar to genetic PD-1 pathway deficiency during the effector phase. These phenotypic differences were not sustained at the memory time point (Figure 5B). There were no differences in CD127<sup>+</sup> KLRG1<sup>–</sup> (Figures 5A and 5B) D<sup>b</sup>GP<sub>33–41</sub><sup>+</sup> CD8<sup>+</sup> T cells at either time point. At day 60<sup>+</sup>, there was a quantitative defect in memory observed in PD-L1/L2 DKO that was not seen in anti-PD-1-treated mice (Figure 5C). Collectively, these data suggest that restricting PD-1 pathway deficiency to the priming stage of influenza led to similar phenotypic changes during the effector phase but did not result in the same memory defect observed in the absence of PD-1 signals.

### DISCUSSION

PD-1 is expressed by all T cells during activation, positioning this pathway to play an essential role in shaping quantitative and

(B) Flow cytometric analysis of BrdU incorporation by WT and PD-1 KO P14 cells at day 7 p.i. Numbers indicate the fraction of BrdU<sup>+</sup> P14 cells. Representative plots from the spleen (left). Summary of BrdU<sup>+</sup> P14 cells in the indicated organs (right).

(C) Longitudinal analysis of WT and PD-1 KO P14 cell numbers in the lung during primary X31-GP33 infection.

(D) Representative plots of intracellular cytokine staining for IFN $\gamma$  and TNF- $\alpha$  (left) in WT and PD-1 KO P14 cells from spleen (top) and lung (bottom) at day 47<sup>+</sup> p.i. and quantification (right).

(E and F) Longitudinal analysis of KLRG1 and CD127 (E) and CD122 (F) expression on transferred PD-1 KO and WT P14 cells on days 8, 20, and 30 p.i. in the lung.

(G) Representative plots of WT and PD-1 KO P14 cells at day 35 p.i. with X31-GP33 (day 35, left) and 7 days after rechallenge with PR8-GP33 (day 42 after primary infection, right). Numbers indicate frequencies of P14 cells as percentages of CD8<sup>+</sup> T cells. A summary of numbers of P14 cells pre- and post-rechallenge is shown (right). Numbers above the bars indicate the fold change between day 35 and day 42 (7 days after rechallenge).

Data are representative of 3–4 independent experiments with 4–6 mice per group and represented as mean  $\pm$  SEM. Significance was assessed using Student's *t* test; ns, not significant; \**p* < 0.05, \*\**p* < 0.01, \*\*\**p* < 0.001. See Figures S5 and S6 for supporting data.



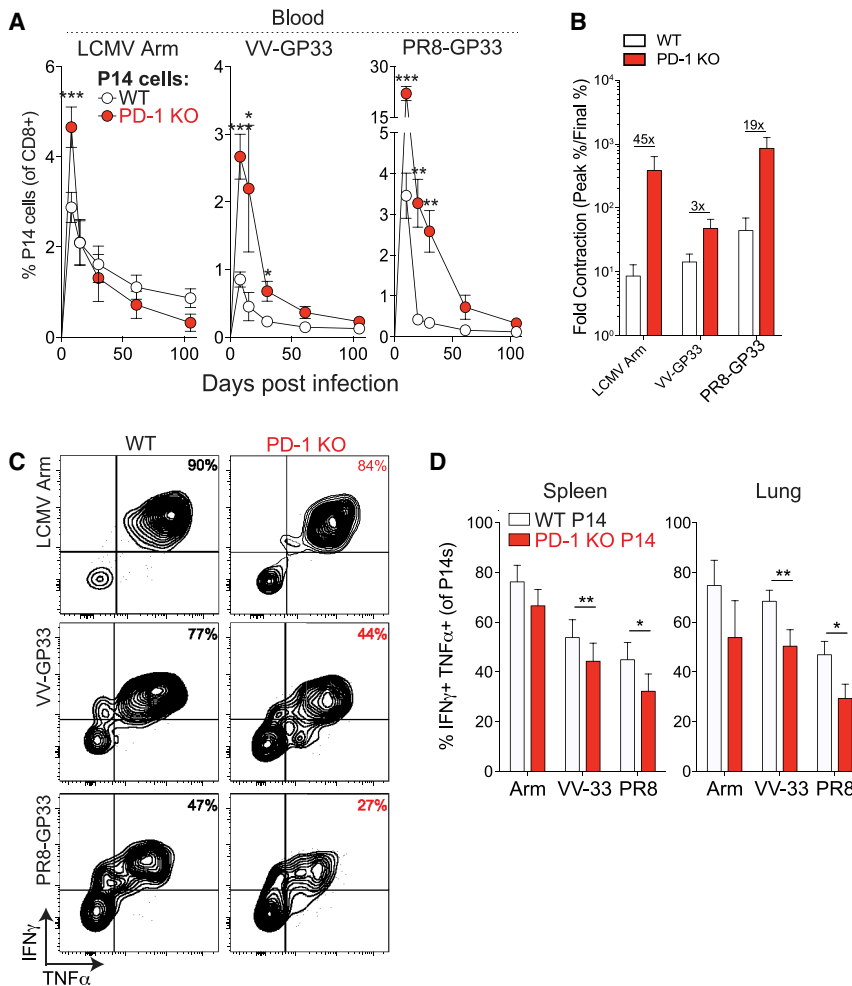

**Figure 4. Cell-Intrinsic Defect in PD-1-Deficient CD8<sup>+</sup> T Cell Memory Is Observed in Multiple Intranasal Infections**

(A) Frequencies of WT and PD-1 KO P14 cells in mixed chimeras in the peripheral blood following primary intranasal infections with LCMV Armstrong, VV-GP33, or PR8-GP33.

(B) Individual bars show fold changes in frequencies of WT and PD-1 KO P14 cells between day 8–10 and day 100<sup>+</sup> from mice in (A). Numbers above bar graphs indicate the difference in ratios observed in WT versus PD-1 KO P14 cells.

(C and D) Representative plots (C) and summary (D) of frequencies of IFN- $\gamma$ <sup>+</sup> TNF- $\alpha$ <sup>+</sup> P14 cells at day 100<sup>+</sup> p.i. Summary data (D) in the spleen (left) and lung (right) are shown.

Data are representative of 2 independent experiments with 4–5 mice per group and represented as mean  $\pm$  SEM. Significance was assessed using Student's *t* test; ns, not significant; \**p* < 0.05, \*\**p* < 0.01, \*\*\**p* < 0.001. Arm, LCMV Armstrong; PR8, PR8-GP33.

qualitative aspects of CD8<sup>+</sup> T cell responses early during differentiation. It is well established that TCR signal strength in the acute phase of an immune response and the formation of self-renewing central memory T cells are inversely correlated, with stronger TCR signals leading to less central memory formation (Wherry et al., 2003; Badovinac et al., 2007; Sarkar et al., 2007; Buchholz et al., 2013; Gerlach et al., 2013; Knudson et al., 2013). Because PD-1 can modulate TCR (Yokosuka et al., 2012; Zinselmeyer et al., 2013; Freeman et al., 2000; Parry et al., 2005; Butte et al., 2007) and CD28 signaling (Hui et al., 2017; Kamphorst et al., 2017), with PD-1 loss resulting in stronger TCR stimulation, we hypothesized that PD-1 KO mice would have defects in the formation of durable memory responses during acute infection. Here we found that complete PD-1 deficiency indeed resulted in the development of suboptimal memory CD8<sup>+</sup> T cells that lacked long-term stability and responded poorly to rechallenge. These defects were associated with early excessive proliferation of effector CD8<sup>+</sup> T cells and increased cell death. The PD-1 pathway regulated this process, at least partly, by controlling expression of cell-cycle genes and other pathways. In contrast, transient PD-1 blockade during the priming and effector stage failed to result in the same memory defect

as constitutive PD-1 pathway deficiency, suggesting that the timing and/or duration of PD-1 loss was critical for determining the effects on memory CD8<sup>+</sup> T cells. Collectively, these findings suggest the PD-1 pathway acts as a key regulator of effector and memory CD8<sup>+</sup> T cell responses during acute viral infection. The complex interplay between TCR signaling, costimulation, and coinhibition at different stages of differentiation (e.g., effector, memory, and exhaustion) and in different anatomical locations (e.g., secondary lymphoid organs versus non-lymphoid tissues) likely influences the effects of PD-1 on T cell responses (Sharpe and Pauken, 2018). Influenza virus infection provides an excellent model for studying the role of PD-1 in regulating CD8<sup>+</sup> T cell differentiation, because this model shares key features with common human infections, including localized rather than systemic antigen and viral replication in a mucosal tissue. One interesting aspect of influenza infection is that although replicating virus is only detectable for ~7–10 days, complexes of peptide and major histocompatibility complex (MHC) can persist for ~30 days or more (Zammit et al., 2006; Kim et al., 2010). Although antigen presentation in this setting may be more prolonged than during other acute infection models like LCMV Armstrong, influenza virus infection still results in the development of bona fide memory CD8<sup>+</sup> T cells that mount effective secondary responses that are protective upon rechallenge (Wu et al., 2014; Laidlaw et al., 2014; Kreijtz et al., 2007), a feature that distinguishes influenza from chronic infections like LCMV clone 13 (Blackburn et al., 2008). Similar to influenza infection, numerous other models used for studying memory T cells have some degree of prolonged antigen presentation, including intranasal infection with vesicular stomatitis virus (VSV) (Turner et al., 2007) or Sendai virus (Takamura et al., 2010), implying that

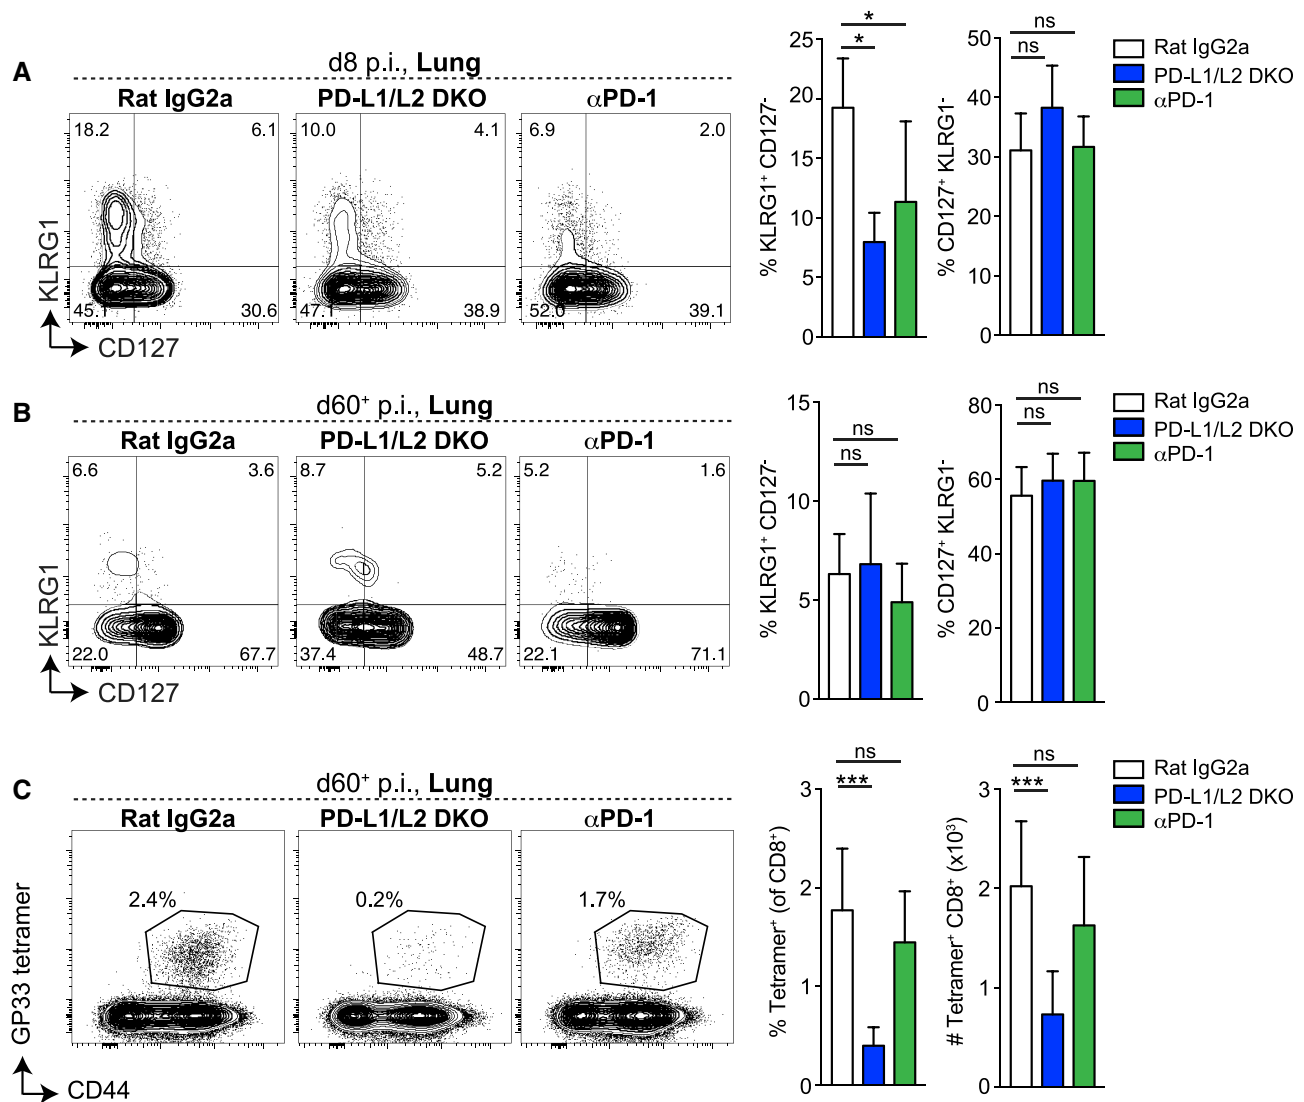

**Figure 5. Transient Early Blockade of the PD-1 Pathway Does Not Result in the Same Memory Defects as Permanent PD-1 Loss**

WT B6 mice were treated with anti-PD-1 antibody (clone 29F.1A12) or isotype control antibody (rat IgG2a) on days  $-1$ ,  $2$ , and  $5$  and harvested on day  $8$  p.i., or treated on days  $-1$ ,  $2$ ,  $5$ , and  $8$  and harvested on day  $60^+$  p.i. PD-L1/L2 DKO mice were included as a control.

(A and B) Representative plots (left) and summary (right) of KLRG1 and CD127 expression on  $D^bGP_{33-41}^+$  CD8 $^+$  T cells in the lung at day  $8$  (A) or day  $60^+$  (B) p.i. (C) Representative plots showing GP and CD44 staining in the lung on day  $60^+$  p.i. Numbers on plots indicate the frequencies of  $D^bGP_{33-41}^+$  cells of the CD8 $^+$  population (left). Summary of frequencies (of the CD8 $^+$  population, middle) and numbers (right) of  $D^bGP_{33-41}^+$  T cells in the lung.

Data from day  $8$  p.i. are representative of 2 independent experiments, and data from day  $60^+$  are pooled from 2 independent experiments with 3–8 mice per group. Data are represented as mean  $\pm$  SEM. Significance was assessed using ANOVA (Kruskal-Wallis test) followed by Dunn's multiple comparison test; ns, not significant; \* $p < 0.05$ , \*\*\* $p < 0.001$ .

persistent antigen presentation may be a feature of intranasal infections in general. Moreover, local antigen recognition is critical for the generation of lung memory CD8 $^+$  T cells (Lee et al., 2011; McMaster et al., 2018; Zammit et al., 2006; Jelley-Gibbs et al., 2005). Considering that the lung is a site of many clinically relevant human infections, as well as tumors, it is important to understand the dynamics of CD8 $^+$  T cell biology, antigen persistence, and the role of PD-1 in this location.

Previous work showed that PD-1 inhibits cell-cycle progression through the G $_1$  phase *in vitro* by modulating key cell-cycle

regulators in CD4 $^+$  T cells (Latchman et al., 2001; Patsoukis et al., 2012). PD-1 also can inhibit phosphatidylinositol 3-kinase (PI3K)/Akt signaling (Parry et al., 2005; Yokosuka et al., 2012). Our transcriptional profiling data showed less T cell proliferation in the lungs of a whole-body KO setting compared with the WT setting at day  $8$  p.i. We speculate that differences in the kinetics of expansion contribute to the transcriptional profiles observed here; CD8 $^+$  T cell proliferation had already peaked in the lungs of the PD-1 pathway KO mice and these cells were beginning to exit cell cycle, whereas the WT CD8 $^+$  T cells were still in the

peak proliferative phase at day 8 p.i. In the P14 chimera setting, PD-1 KO P14 cells incorporated significantly more BrdU within the first 7 days p.i. than WT P14 cells, suggesting that the PD-1 KO cells were undergoing more or faster cell cycles during that early phase. Similarly, the CD8<sup>+</sup> T cells in the spleen of PD-L1/L2 DKO showed a higher frequency of Ki-67<sup>+</sup> cells at day 8 p.i. compared with WT CD8<sup>+</sup> T cells. Our transcriptional data suggest that PD-1 pathway deficiency resulted in T cells that were responding with faster kinetics and that had already proliferated at the time of analysis, whereas control WT T cells were still proliferating. Thus, our data indicate that CD8<sup>+</sup> T cells responding in the genetic absence of PD-1 pathway signals were able to rapidly proliferate but that this occurs earlier compared with WT T cells.

PD-1 deficiency resulted in impaired virus-specific memory CD8<sup>+</sup> T cell responses for all epitopes examined, but there were temporal differences in the erosion of the responses to dominant and subdominant epitopes. During influenza virus infection, CD8<sup>+</sup> T cells specific for different epitopes receive qualitatively different signals that affect memory CD8<sup>+</sup> T cell responses (Ballesteros-Tato et al., 2014). D<sup>b</sup>NP<sub>366-374</sub><sup>+</sup> CD8<sup>+</sup> T cells encounter antigen on CD40-licensed DCs later than D<sup>b</sup>PA<sub>224-233</sub><sup>+</sup> CD8<sup>+</sup> T cells, leading to sustained CD25 expression, better responses to interleukin-2 (IL-2), and the ability to dominate secondary responses. The differences in these responses may explain temporal differences in the effects of PD-1 deficiency on CD8<sup>+</sup> T cell differentiation of the immunodominant CD8<sup>+</sup> T cell response (D<sup>b</sup>NP<sub>366-374</sub>) compared with the subdominant responses (D<sup>b</sup>PA<sub>224-233</sub><sup>+</sup> and D<sup>b</sup>GP<sub>33-41</sub><sup>+</sup>). Although the subdominant responses showed more rapid contraction in PD-1 pathway-deficient mice, ultimately the D<sup>b</sup>NP<sub>366-374</sub><sup>+</sup> CD8<sup>+</sup> T cell response contracted more compared with WT mice, consistent with the notion of PD-1 signals modulating CD8<sup>+</sup> T cell memory formation. However, the timing of contraction and the severity of the memory defect following PD-1 loss may be multifactorial depending on TCR affinity, access to antigen, costimulation, and/or growth factors in the tissue microenvironment. Consistent with this notion, the virus-specific CD8<sup>+</sup> T cell population in lung contracted more dramatically in intact PD-1 pathway KO mice compared with the P14 mixed chimera setting in which WT and PD-1 KO CD8<sup>+</sup> T cells were present in the same WT mice. These differences between the two settings may reflect changes in cell-extrinsic factors such as viral burden between the two models.

Our studies suggest that the PD-1 pathway regulates CD8<sup>+</sup> T cell responses to infection in several ways. Previous work showed that antibody blockade or genetic deletion of the PD-1 pathway enhanced early virus-specific effector CD8<sup>+</sup> T cell responses to respiratory infection (Erickson et al., 2012), consistent with the enhanced effector responses observed here. Our work extends these findings by showing that early augmented effector responses without PD-1 signals result in subsequent defects in CD8<sup>+</sup> T cell memory in the absence of PD-1 signals. The continued contraction of PD-1 KO CD8<sup>+</sup> T cells likely points to a defect in memory maintenance, which would be consistent with the role of antigen in the long-term maintenance of memory T cells in the lung (Jelley-Gibbs et al., 2005; Zammit et al., 2006; Lee et al., 2011; McMaster et al., 2018) and continued

regulation by PD-1 during later stages of the memory response. Moreover, selective PD-1 blockade only during the early stages of infection (day -1 to 8 p.i.) did not result in the same memory defect observed in the genetic KO setting, suggesting that the PD-1 pathway may continue to function as an integrator of signals required for memory T cell maintenance after the initial priming and effector stages of the immune response. Additional studies are needed to define how the timing and/or duration of PD-1 loss affect the effector and memory stages of CD8<sup>+</sup> T cell differentiation. Lastly, further studies are needed to determine whether the results obtained here using respiratory infections are broadly applicable to other types of infections, as well as tumors, or whether these findings are specific to the lung microenvironment.

In summary, our findings reveal that a key function of PD-1 is to temper excessive T cell proliferation and facilitate the development of optimal CD8<sup>+</sup> T cell memory. Although our studies have defined a CD8<sup>+</sup> T cell memory defect in global PD-1 pathway KO mice, selective PD-1 pathway disruption only during the priming and effector phase did not show the same memory defect, suggesting that the timing and/or duration of PD-1 blockade during CD8<sup>+</sup> T cell differentiation can critically influence outcomes. Thus, targeting the PD-1 pathway during different stages of an immune response may result in distinct effects on CD8<sup>+</sup> T cell differentiation, recall responses, and/or memory maintenance. These concepts may be of interest in the cancer setting, in which the timing, duration, and/or sequence of PD-1 blockade relative to other therapies may influence patient outcomes. Control of cell cycle and apoptosis likely contributes to how PD-1:PD-L signals influence CD8<sup>+</sup> T cell memory. Future work clarifying the mechanisms by which PD-1 contributes to effector versus memory differentiation during both infection and cancer will be important for determining how to optimally administer PD-1 blocking agents alone and with other therapies to achieve durable improved immunity.

## STAR★METHODS

Detailed methods are provided in the online version of this paper and include the following:

- KEY RESOURCES TABLE
- RESOURCE AVAILABILITY
  - Lead Contact
  - Materials Availability
  - Data and Code Availability
- EXPERIMENTAL MODEL AND SUBJECT DETAILS
  - Mice
  - Viral infections and antibody treatments
- METHOD DETAILS
  - Isolation of Lymphocytes and Flow Cytometry
  - Gene Expression Microarray
- QUANTIFICATION AND STATISTICAL ANALYSIS

## SUPPLEMENTAL INFORMATION

Supplemental Information can be found online at <https://doi.org/10.1016/j.celrep.2020.107827>.

## ACKNOWLEDGMENTS

We thank Dr. Jason Schenkel, Dr. Alison Ringel, and members of the Sharpe and Wherry labs for discussions. This work was funded by NIH grants P01 AI078897, P01 AI112521, and P01 AI108545 and BAA HHSN266200500030C (to A.H.S. and E.J.W.), R01 AI105343 and U19 AI082630 (to E.J.W.), P01 AI56299, P01 AI039671, and R01 CA229851 (to A.H.S.), and the Cancer Research Institute Predoctoral Emphasis Pathway in Tumor Immunology (to J.G.). E.J.W. is supported by the Parker Institute for Cancer Immunotherapy.

## AUTHOR CONTRIBUTIONS

K.E.P., J.G., P.M.O., K.E.B., E.J.W., and A.H.S. conceived the studies. K.E.P., J.G., P.M.O., K.E.B., M.-A.A., S.F.N., K.P.B., and S.M. performed experiments and generated primary data, including developing methodology, validation, and data curation. K.E.P., J.G., P.M.O., and K.E.B. performed formal analysis and visualization. S.M.G., L.M.F., and M.-A.A. assisted in animal colony maintenance and performing some mouse experiments. K.B.Y., S.I., and W.N.H. performed and analyzed transcriptional profiling data. K.E.P., J.G., P.M.O., K.E.B., G.J.F., E.J.W., and A.H.S. contributed to writing the manuscript. All authors contributed to reviewing and editing the final manuscript. E.J.W. and A.H.S. were responsible for project supervision, administration, and funding acquisition.

## DECLARATION OF INTERESTS

A.H.S. and G.J.F. have patents/pending royalties on the PD-1 pathway from Roche, Merck, Bristol-Myers-Squibb, EMD-Serono, Boehringer-Ingelheim, AstraZeneca, Dako, and Novartis. G.J.F. has equity in Nextpoint, Triurus, and Xios. G.J.F. has served on advisory boards for Roche, Bristol-Myers-Squibb, Xios, and Origimed. A.H.S. is on advisory boards for Surface Oncology, Elstar, SQZ Biotechnologies, Selecta, Elpiscience, and Monopteros and has research funding from Novartis, Roche, Ipsen, Quark, and Merck. E.J.W. receives honoraria, consulting fees, and/or research support from BMS, Celgene, Dynavax, Eli Lilly, Elstar, Merck, MedImmune, Pieris, Roche, Surface Oncology, and KyMab. E.J.W. is a founder of Arsenal Biosciences. E.J.W. has a patent licensing agreement for the PD-1 pathway licensed by Genentech/Roche. W.N.H. is a founder of and equity holder at Arsenal Biosciences, equity holder at Tango therapeutics, and employee of Merck and Co.

Received: August 24, 2017

Revised: July 5, 2019

Accepted: June 5, 2020

Published: June 30, 2020

## REFERENCES

Ahn, E., Araki, K., Hashimoto, M., Li, W., Riley, J.L., Cheung, J., Sharpe, A.H., Freeman, G.J., Irving, B.A., and Ahmed, R. (2018). Role of PD-1 during effector CD8 T cell differentiation. *Proc. Natl. Acad. Sci. USA* *115*, 4749–4754.

Allie, S.R., Zhang, W., Fuse, S., and Usherwood, E.J. (2011). Programmed death 1 regulates development of central memory CD8 T cells after acute viral infection. *J. Immunol.* *186*, 6280–6286.

Ashburner, M., Ball, C.A., Blake, J.A., Botstein, D., Butler, H., Cherry, J.M., Davis, A.P., Dolinski, K., Dwight, S.S., Eppig, J.T., et al.; The Gene Ontology Consortium (2000). Gene Ontology: tool for the unification of biology. *Nat. Genet.* *25*, 25–29.

Badovinac, V.P., Haring, J.S., and Harty, J.T. (2007). Initial T cell receptor transgenic cell precursor frequency dictates critical aspects of the CD8(+) T cell response to infection. *Immunity* *26*, 827–841.

Ballesteros-Tato, A., León, B., Lee, B.O., Lund, F.E., and Randall, T.D. (2014). Epitope-specific regulation of memory programming by differential duration of antigen presentation to influenza-specific CD8(+) T cells. *Immunity* *41*, 127–140.

Barber, D.L., Wherry, E.J., Masopust, D., Zhu, B., Allison, J.P., Sharpe, A.H., Freeman, G.J., and Ahmed, R. (2006). Restoring function in exhausted CD8 T cells during chronic viral infection. *Nature* *439*, 682–687.

Blackburn, S.D., Shin, H., Freeman, G.J., and Wherry, E.J. (2008). Selective expansion of a subset of exhausted CD8 T cells by alphaPD-L1 blockade. *Proc. Natl. Acad. Sci. USA* *105*, 15016–15021.

Brahmer, J.R., Tykodi, S.S., Chow, L.Q.M., Hwu, W.-J., Topalian, S.L., Hwu, P., Drake, C.G., Camacho, L.H., Kauh, J., Odunsi, K., et al. (2012). Safety and activity of anti-PD-L1 antibody in patients with advanced cancer. *N. Engl. J. Med.* *366*, 2455–2465.

Buchholz, V.R., Flossdorf, M., Hensel, I., Kretschmer, L., Weissbrich, B., Gräf, P., Verschoor, A., Schiemann, M., Höfer, T., and Busch, D.H. (2013). Disparate individual fates compose robust CD8+ T cell immunity. *Science* *340*, 630–635.

Butte, M.J., Keir, M.E., Phamduy, T.B., Sharpe, A.H., and Freeman, G.J. (2007). Programmed death-1 ligand 1 interacts specifically with the B7-1 costimulatory molecule to inhibit T cell responses. *Immunity* *27*, 111–122.

Chang, J.T., Wherry, E.J., and Goldrath, A.W. (2014). Molecular regulation of effector and memory T cell differentiation. *Nat. Immunol.* *15*, 1104–1115.

Chen, L., and Flies, D.B. (2013). Molecular mechanisms of T cell co-stimulation and co-inhibition. *Nat. Rev. Immunol.* *13*, 227–242.

Chen, D.S., and Mellman, I. (2017). Elements of cancer immunity and the cancer-immune set point. *Nature* *541*, 321–330.

Curtsinger, J.M., Schmidt, C.S., Mondino, A., Lins, D.C., Kedl, R.M., Jenkins, M.K., and Mescher, M.F. (1999). Inflammatory cytokines provide a third signal for activation of naive CD4+ and CD8+ T cells. *J. Immunol.* *162*, 3256–3262.

Day, C.L., Kaufmann, D.E., Kiepiela, P., Brown, J.A., Moodley, E.S., Reddy, S., Mackey, E.W., Miller, J.D., Leslie, A.J., DePierres, C., et al. (2006). PD-1 expression on HIV-specific T cells is associated with T-cell exhaustion and disease progression. *Nature* *443*, 350–354.

Erickson, J.J., Gilchuk, P., Hastings, A.K., Tollefson, S.J., Johnson, M., Downing, M.B., Boyd, K.L., Johnson, J.E., Kim, A.S., Joyce, S., and Williams, J.V. (2012). Viral acute lower respiratory infections impair CD8+ T cells through PD-1. *J. Clin. Invest.* *122*, 2967–2982.

Flynn, K.J., Belz, G.T., Altman, J.D., Ahmed, R., Woodland, D.L., and Doherty, P.C. (1998). Virus-specific CD8+ T cells in primary and secondary influenza pneumonia. *Immunity* *8*, 683–691.

Francisco, L.M., Sage, P.T., and Sharpe, A.H. (2010). The PD-1 pathway in tolerance and autoimmunity. *Immunol. Rev.* *236*, 219–242.

Frebel, H., Nindl, V., Schuepbach, R.A., Braunschweiler, T., Richter, K., Vogel, J., Wagner, C.A., Loffing-Cueni, D., Kurrer, M., Ludewig, B., and Oxenius, A. (2012). Programmed death 1 protects from fatal circulatory failure during systemic virus infection of mice. *J. Exp. Med.* *209*, 2485–2499.

Freeman, G.J., Long, A.J., Iwai, Y., Bourque, K., Chernova, T., Nishimura, H., Fitz, L.J., Malenkovich, N., Okazaki, T., Byrne, M.C., et al. (2000). Engagement of the PD-1 immunoinhibitory receptor by a novel B7 family member leads to negative regulation of lymphocyte activation. *J. Exp. Med.* *192*, 1027–1034.

Fuse, S., Tsai, C.Y., Molloy, M.J., Allie, S.R., Zhang, W., Yagita, H., and Usherwood, E.J. (2009). Recall responses by helpless memory CD8+ T cells are restricted by the up-regulation of PD-1. *J. Immunol.* *182*, 4244–4254.

Gerlach, C., Rohr, J.C., Perié, L., van Rooij, N., van Heijst, J.W., Velds, A., Urbanus, J., Naik, S.H., Jacobs, H., Beltman, J.B., et al. (2013). Heterogeneous differentiation patterns of individual CD8+ T cells. *Science* *340*, 635–639.

Haining, W.N., Ebert, B.L., Subramanian, A., Wherry, E.J., Eichbaum, Q., Evans, J.W., Mak, R., Rivoli, S., Pretz, J., Angelosanto, J., et al. (2008). Identification of an evolutionarily conserved transcriptional signature of CD8 memory differentiation that is shared by T and B cells. *J. Immunol.* *181*, 1859–1868.

Hui, E., Cheung, J., Zhu, J., Su, X., Taylor, M.J., Wallweber, H.A., Sasmal, D.K., Huang, J., Kim, J.M., Mellman, I., and Vale, R.D. (2017). T cell costimulatory



- receptor CD28 is a primary target for PD-1-mediated inhibition. *Science* **355**, 1428–1433.
- Jelley-Gibbs, D.M., Brown, D.M., Dibble, J.P., Haynes, L., Eaton, S.M., and Swain, S.L. (2005). Unexpected prolonged presentation of influenza antigens promotes CD4 T cell memory generation. *J. Exp. Med.* **202**, 697–706.
- Kamphorst, A.O., Wieland, A., Nasti, T., Yang, S., Zhang, R., Barber, D.L., Koenig, B.T., Daugherty, C.Z., Koenig, L., Yu, K., et al. (2017). Rescue of exhausted CD8 T cells by PD-1-targeted therapies is CD28-dependent. *Science* **355**, 1423–1427.
- Keir, M.E., Liang, S.C., Guleria, I., Latchman, Y.E., Qipo, A., Albacker, L.A., Koulmanda, M., Freeman, G.J., Sayegh, M.H., and Sharpe, A.H. (2006). Tissue expression of PD-L1 mediates peripheral T cell tolerance. *J. Exp. Med.* **203**, 883–895.
- Keir, M.E., Freeman, G.J., and Sharpe, A.H. (2007). PD-1 regulates self-reactive CD8+ T cell responses to antigen in lymph nodes and tissues. *J. Immunol.* **179**, 5064–5070.
- Kim, T.S., Hufford, M.M., Sun, J., Fu, Y.X., and Braciale, T.J. (2010). Antigen persistence and the control of local T cell memory by migrant respiratory dendritic cells after acute virus infection. *J. Exp. Med.* **207**, 1161–1172.
- Knudson, K.M., Goplen, N.P., Cunningham, C.A., Daniels, M.A., and Teixeira, E. (2013). Low-affinity T cells are programmed to maintain normal primary responses but are impaired in their recall to low-affinity ligands. *Cell Rep.* **4**, 554–565.
- Kreijtz, J.H., Bodewes, R., van Amerongen, G., Kuiken, T., Fouchier, R.A., Osterhaus, A.D., and Rimmelzwaan, G.F. (2007). Primary influenza A virus infection induces cross-protective immunity against a lethal infection with a heterosubtypic virus strain in mice. *Vaccine* **25**, 612–620.
- Laidlaw, B.J., Decman, V., Ali, M.A., Abt, M.C., Wolf, A.I., Monticelli, L.A., Mozdzanowska, K., Angelosanto, J.M., Artis, D., Erikson, J., and Wherry, E.J. (2013). Cooperativity between CD8+ T cells, non-neutralizing antibodies, and alveolar macrophages is important for heterosubtypic influenza virus immunity. *PLoS Pathog.* **9**, e1003207.
- Laidlaw, B.J., Zhang, N., Marshall, H.D., Staron, M.M., Guan, T., Hu, Y., Cauley, L.S., Craft, J., and Kaech, S.M. (2014). CD4+ T cell help guides formation of CD103+ lung-resident memory CD8+ T cells during influenza viral infection. *Immunity* **41**, 633–645.
- Latchman, Y., Wood, C.R., Chernova, T., Chaudhary, D., Borde, M., Chernova, I., Iwai, Y., Long, A.J., Brown, J.A., Nunes, R., et al. (2001). PD-L2 is a second ligand for PD-1 and inhibits T cell activation. *Nat. Immunol.* **2**, 261–268.
- Lee, Y.T., Suarez-Ramirez, J.E., Wu, T., Redman, J.M., Bouchard, K., Hadley, G.A., and Cauley, L.S. (2011). Environmental and antigen receptor-derived signals support sustained surveillance of the lungs by pathogen-specific cytotoxic T lymphocytes. *J. Virol.* **85**, 4085–4094.
- Liang, S., Mozdzanowska, K., Palladino, G., and Gerhard, W. (1994). Heterosubtypic immunity to influenza type A virus in mice. Effector mechanisms and their longevity. *J. Immunol.* **152**, 1653–1661.
- McMaster, S.R., Wein, A.N., Dunbar, P.R., Hayward, S.L., Cartwright, E.K., Denning, T.L., and Kohlmeier, J.E. (2018). Pulmonary antigen encounter regulates the establishment of tissue-resident CD8 memory T cells in the lung airways and parenchyma. *Mucosal Immunol.* **11**, 1071–1078.
- Mueller, S.N., Langley, W.A., Li, G., Garcia-Sastre, A., Webby, R.J., and Ahmed, R. (2010). Qualitatively different memory CD8+ T cells are generated after lymphocytic choriomeningitis virus and influenza virus infections. *J. Immunol.* **185**, 2182–2190.
- Odorizzi, P.M., Pauken, K.E., Paley, M.A., Sharpe, A., and Wherry, E.J. (2015). Genetic absence of PD-1 promotes accumulation of terminally differentiated exhausted CD8+ T cells. *J. Exp. Med.* **212**, 1125–1137.
- Page, D.B., Postow, M.A., Callahan, M.K., Allison, J.P., and Wolchok, J.D. (2014). Immune modulation in cancer with antibodies. *Annu. Rev. Med.* **65**, 185–202.
- Pardoll, D.M. (2012). The blockade of immune checkpoints in cancer immunotherapy. *Nat. Rev. Cancer* **12**, 252–264.
- Parry, R.V., Chemnitz, J.M., Frauwirth, K.A., Lanfranco, A.R., Braunstein, I., Kobayashi, S.V., Linsley, P.S., Thompson, C.B., and Riley, J.L. (2005). CTLA-4 and PD-1 receptors inhibit T-cell activation by distinct mechanisms. *Mol. Cell. Biol.* **25**, 9543–9553.
- Patsoukis, N., Brown, J., Petkova, V., Liu, F., Li, L., and Boussiotis, V.A. (2012). Selective effects of PD-1 on Akt and Ras pathways regulate molecular components of the cell cycle and inhibit T cell proliferation. *Sci. Signal.* **5**, ra46.
- Pircher, H., Bürki, K., Lang, R., Hengartner, H., and Zinkernagel, R.M. (1989). Tolerance induction in double specific T-cell receptor transgenic mice varies with antigen. *Nature* **342**, 559–561.
- Rodriguez, F., An, L.L., Harkins, S., Zhang, J., Yokoyama, M., Widera, G., Fuller, J.T., Kincaid, C., Campbell, I.L., and Whitton, J.L. (1998). DNA immunization with minigenes: low frequency of memory cytotoxic T lymphocytes and inefficient antiviral protection are rectified by ubiquitination. *J. Virol.* **72**, 5174–5181.
- Rowe, J.H., Johanns, T.M., Ertelt, J.M., and Way, S.S. (2008). PDL-1 blockade impedes T cell expansion and protective immunity primed by attenuated *Listeria monocytogenes*. *J. Immunol.* **180**, 7553–7557.
- Sarkar, S., Teichgräber, V., Kalia, V., Polley, A., Masopust, D., Harrington, L.E., Ahmed, R., and Wherry, E.J. (2007). Strength of stimulus and clonal competition impact the rate of memory CD8 T cell differentiation. *J. Immunol.* **179**, 6704–6714.
- Sharpe, A.H., and Pauken, K.E. (2018). The diverse functions of the PD1 inhibitory pathway. *Nat. Rev. Immunol.* **18**, 153–167.
- Subramanian, A., Tamayo, P., Mootha, V.K., Mukherjee, S., Ebert, B.L., Gillette, M.A., Paulovich, A., Pomeroy, S.L., Golub, T.R., Lander, E.S., and Mesirov, J.P. (2005). Gene set enrichment analysis: a knowledge-based approach for interpreting genome-wide expression profiles. *Proc. Natl. Acad. Sci. USA* **102**, 15545–15550.
- Takamura, S., Roberts, A.D., Jelley-Gibbs, D.M., Wittmer, S.T., Kohlmeier, J.E., and Woodland, D.L. (2010). The route of priming influences the ability of respiratory virus-specific memory CD8+ T cells to be activated by residual antigen. *J. Exp. Med.* **207**, 1153–1160.
- Talay, O., Shen, C.H., Chen, L., and Chen, J. (2009). B7-H1 (PD-L1) on T cells is required for T-cell-mediated conditioning of dendritic cell maturation. *Proc. Natl. Acad. Sci. USA* **106**, 2741–2746.
- Topalian, S.L., Hodi, F.S., Brahmer, J.R., Gettinger, S.N., Smith, D.C., McDermott, D.F., Powderly, J.D., Carvajal, R.D., Sosman, J.A., Atkins, M.B., et al. (2012). Safety, activity, and immune correlates of anti-PD-1 antibody in cancer. *N. Engl. J. Med.* **366**, 2443–2454.
- Topalian, S.L., Drake, C.G., and Pardoll, D.M. (2015). Immune checkpoint blockade: a common denominator approach to cancer therapy. *Cancer Cell* **27**, 450–461.
- Turner, D.L., Cauley, L.S., Khanna, K.M., and Lefrançois, L. (2007). Persistent antigen presentation after acute vesicular stomatitis virus infection. *J. Virol.* **81**, 2039–2046.
- Wherry, E.J., Teichgräber, V., Becker, T.C., Masopust, D., Kaech, S.M., Antia, R., von Andrian, U.H., and Ahmed, R. (2003). Lineage relationship and protective immunity of memory CD8 T cell subsets. *Nat. Immunol.* **4**, 225–234.
- Wu, T., Hu, Y., Lee, Y.T., Bouchard, K.R., Benechet, A., Khanna, K., and Cauley, L.S. (2014). Lung-resident memory CD8 T cells (TRM) are indispensable for optimal cross-protection against pulmonary virus infection. *J. Leukoc. Biol.* **95**, 215–224.
- Xu, D., Fu, H.H., Obar, J.J., Park, J.J., Tamada, K., Yagita, H., and Lefrançois, L. (2013). A potential new pathway for PD-L1 costimulation of the CD8-T cell response to *Listeria monocytogenes* infection. *PLoS ONE* **8**, e56539.



Yao, S., Wang, S., Zhu, Y., Luo, L., Zhu, G., Flies, S., Xu, H., Ruff, W., Broadwater, M., Choi, I.H., et al. (2009). PD-1 on dendritic cells impedes innate immunity against bacterial infection. *Blood* *113*, 5811–5818.

Yokosuka, T., Takamatsu, M., Kobayashi-Imanishi, W., Hashimoto-Tane, A., Azuma, M., and Saito, T. (2012). Programmed cell death 1 forms negative costimulatory microclusters that directly inhibit T cell receptor signaling by recruiting phosphatase SHP2. *J. Exp. Med.* *209*, 1201–1217.

Zammit, D.J., Turner, D.L., Klonowski, K.D., Lefrançois, L., and Cauley, L.S. (2006). Residual antigen presentation after influenza virus infection affects CD8 T cell activation and migration. *Immunity* *24*, 439–449.

Zinselmeyer, B.H., Heydari, S., Sacristán, C., Nayak, D., Cammer, M., Herz, J., Cheng, X., Davis, S.J., Dustin, M.L., and McGavern, D.B. (2013). PD-1 promotes immune exhaustion by inducing antiviral T cell motility paralysis. *J. Exp. Med.* *210*, 757–774.

## STAR★METHODS

### KEY RESOURCES TABLE

| REAGENT or RESOURCE                                                     | SOURCE                   | IDENTIFIER                      |
|-------------------------------------------------------------------------|--------------------------|---------------------------------|
| <b>Antibodies</b>                                                       |                          |                                 |
| Rat anti-mouse PD-1 clone 29F.1A12 (used for <i>in vivo</i> treatments) | BioXCell                 | Cat# BE0273; RRID:AB_2687796    |
| Rat IgG2a clone 2A3 (used for <i>in vivo</i> treatments)                | BioXCell                 | Cat#BE0089; RRID:AB_1107769     |
| Rat anti-mouse CD8 $\alpha$ (53-6.7)(used for flow cytometry)           | BioLegend                | Cat#100723; RRID:AB_389304      |
| Rat anti-mouse CD8 $\alpha$ (53-6.7)(used for flow cytometry)           | BioLegend                | Cat#100712; RRID:AB_312751      |
| Rat anti-mouse CD8 $\alpha$ (53-6.7)(used for flow cytometry)           | BD Biosciences           | Cat#564297; RRID:AB_2722580     |
| Rat anti-mouse CD8 $\alpha$ (53-6.7)(used for flow cytometry)           | BD Biosciences           | Cat#612898; N/A                 |
| Rat anti-mouse CD8 $\alpha$ (53-6.7)(used for flow cytometry)           | Thermo Fisher Scientific | Cat#61-0081-82; RRID:AB_2574524 |
| Rat anti-mouse/human CD44 (IM7)(used for flow cytometry)                | BioLegend                | Cat#103059; RRID:AB_2571953     |
| Rat anti-mouse/human CD44 (IM7)(used for flow cytometry)                | BioLegend                | Cat#103020; RRID:AB_493683      |
| Rat anti-mouse/human CD44 (IM7)(used for flow cytometry)                | BioLegend                | Cat#103026; RRID:AB_493713      |
| Rat anti-mouse/human CD44 (IM7)(used for flow cytometry)                | BioLegend                | Cat#103030; RRID:AB_830787      |
| Rat anti-mouse IFN $\gamma$ (XMG1.2)(used for flow cytometry)           | BioLegend                | Cat#505822; RRID:AB_961359      |
| Rat anti-mouse IFN $\gamma$ (XMG1.2)(used for flow cytometry)           | BioLegend                | Cat#505810; RRID:AB_315404      |
| Rat anti-mouse TNF $\alpha$ (MP6-XT22)(used for flow cytometry)         | BioLegend                | Cat#506322; RRID:AB_961434      |
| Rat anti-mouse TNF $\alpha$ (MP6-XT22)(used for flow cytometry)         | BioLegend                | Cat#506314; RRID:AB_493330      |
| Rat anti-mouse TNF $\alpha$ (MP6-XT22)(used for flow cytometry)         | BioLegend                | Cat#506328; RRID:AB_2562902     |
| Rat anti-mouse CD127 (SB/199)(used for flow cytometry)                  | BioLegend                | Cat#121112; RRID:AB_493509      |
| Rat anti-mouse CD127 (A7r34)(used for flow cytometry)                   | BioLegend                | Cat#135024; RRID:AB_11218800    |
| Rat anti-mouse CD127 (A7r34)(used for flow cytometry)                   | BioLegend                | Cat#135010; RRID:AB_1937251     |
| Rat anti-mouse CD122 (TM- $\beta$ 1)(used for flow cytometry)           | BioLegend                | Cat#123208; RRID:AB_940613      |
| Rat anti-mouse CD122 (TM- $\beta$ 1)(used for flow cytometry)           | Thermo Fisher Scientific | Cat#48-1222-82; RRID:AB_2016697 |
| Armenian hamster anti-mouse CXCR3 (CXCR3-173) (used for flow cytometry) | BioLegend                | Cat#126529; RRID:AB_2563100     |
| Armenian hamster anti-mouse CXCR3 (CXCR3-173) (used for flow cytometry) | BioLegend                | Cat#126522; RRID:AB_2562205     |
| Rat anti-mouse Tim-3 or CD366 (RMT3-23)(used for flow cytometry)        | BioLegend                | Cat#119721; RRID:AB_2616907     |
| Rat anti-mouse CD62L (MEL-14)(used for flow cytometry)                  | BioLegend                | Cat#104445; RRID:AB_2564215     |
| Rat anti-mouse CD62L (MEL-14)(used for flow cytometry)                  | BD Biosciences           | Cat#562404; RRID:AB_11154046    |
| Rat anti-mouse CD160 (7H1) (used for flow cytometry)                    | BioLegend                | Cat#143008; RRID:AB_2562676     |
| Rat anti-mouse CD160 (7H1) (used for flow cytometry)                    | BioLegend                | Cat#143004; RRID:AB_10960743    |
| Rat anti-mouse CD25 (PC61) (used for flow cytometry)                    | BioLegend                | Cat#102008; RRID:AB_312857      |
| Rat anti-mouse TCR V $\alpha$ 2 (B20.1) (used for flow cytometry)       | BioLegend                | Cat#127814; RRID:AB_1186116     |
| Armenian hamster anti-mouse CD69 (H1.2F3) (used for flow cytometry)     | BioLegend                | Cat#104514; RRID:AB_492843      |
| Mouse anti-mouse CD45.1 (A20)(used for flow cytometry)                  | BioLegend                | Cat#110708; RRID:AB_313497      |
| Mouse anti-mouse CD45.1 (A20)(used for flow cytometry)                  | BioLegend                | Cat #110714; RRID:AB_313503     |
| Mouse anti-mouse CD45.1 (A20)(used for flow cytometry)                  | BioLegend                | Cat#110724; RRID:AB_493733      |
| Mouse anti-mouse CD45.2 (104)(used for flow cytometry)                  | BioLegend                | Cat#109841; RRID:AB_2563485     |
| Mouse anti-mouse CD45.2 (104)(used for flow cytometry)                  | BioLegend                | Cat#109828; RRID:AB_893350      |
| Mouse anti-mouse CD45.2 (104)(used for flow cytometry)                  | BioLegend                | Cat#109806; RRID:AB_313443      |
| Rat anti-mouse PD-1 (RMP1-30)(used for flow cytometry)                  | BioLegend                | Cat#109110; RRID:AB_572017      |
| Rat anti-mouse PD-L1 (10F.9G2)(used for flow cytometry)                 | BioLegend                | Cat#124312; RRID:AB_10612741    |

(Continued on next page)

| <b>Continued</b>                                                             |                                                              |                                                                                                         |
|------------------------------------------------------------------------------|--------------------------------------------------------------|---------------------------------------------------------------------------------------------------------|
| REAGENT or RESOURCE                                                          | SOURCE                                                       | IDENTIFIER                                                                                              |
| Rat anti-mouse PD-L1 (10F.9G2)(used for flow cytometry)                      | BioLegend                                                    | Cat# 124308; RRID:AB_2073556                                                                            |
| Rat anti-mouse PD-L2 (TY25)(used for flow cytometry)                         | BioLegend                                                    | Cat#107206; RRID:AB_2162011                                                                             |
| Rat anti-mouse/human CD11b (M1/70) (used for flow cytometry)                 | BioLegend                                                    | Cat#101228; RRID:AB_893232                                                                              |
| Armenian hamster anti-mouse CD11c (N418)(used for flow cytometry)            | BioLegend                                                    | Cat#117322; RRID:AB_755988                                                                              |
| Rat anti-mouse CD19 (6D5)(used for flow cytometry)                           | BioLegend                                                    | Cat#115530; RRID:AB_830707                                                                              |
| Rat anti-mouse CD4 (GK1.5)(used for flow cytometry)                          | BioLegend                                                    | Cat#100428; RRID:AB_493647                                                                              |
| Rat anti-mouse CD4 (GK1.5)(used for flow cytometry)                          | BioLegend                                                    | Cat#100412; RRID:AB_312697                                                                              |
| Rat anti-mouse Ep-CAM or CD326 (G8.8) (used for flow cytometry)              | BioLegend                                                    | Cat#118218; RRID:AB_2098648                                                                             |
| Rat anti-mouse CD31 (390) (used for flow cytometry)                          | BioLegend                                                    | Cat#102416; RRID:AB_493410                                                                              |
| Rat anti-mouse CD4 (RM4-5) (used for flow cytometry)                         | Thermo Fisher Scientific                                     | Cat#47-0042-82; RRID:AB_1272183                                                                         |
| Mouse anti-human/mouse Ki-67 (B56) (used for flow cytometry)                 | BD Biosciences                                               | Cat#561277; RRID:AB_10611571                                                                            |
| Mouse anti-human/mouse Ki-67 (B56) (used for flow cytometry)                 | BD Biosciences                                               | Cat#556026; RRID:AB_396302                                                                              |
| Armenian hamster anti-mouse CD3 (145-2C11)                                   | BD Biosciences                                               | Cat#563565; RRID:AB_2738278                                                                             |
| Syrian hamster anti-mouse KLRG1 (2F1) (used for flow cytometry)              | Southern Biotech                                             | Cat#1807-02; RRID:AB_2795367                                                                            |
| Syrian hamster anti-mouse KLRG1 (2F1) (used for flow cytometry)              | Abcam                                                        | Cat#ab25205; RRID:AB_448711                                                                             |
| Syrian hamster anti-mouse KLRG1, eBioscience (2F1) (used for flow cytometry) | Thermo Fisher Scientific                                     | Cat#61-5893-82; RRID:AB_2574630                                                                         |
| <b>Bacterial and Virus Strains</b>                                           |                                                              |                                                                                                         |
| Influenza strain X31 expressing the GP33-41 epitope from LCMV                | Richard Webby ( <a href="#">Laidlaw et al., 2013</a> )       | Grown up in house                                                                                       |
| Influenza strain PR8 expressing the GP33-41 epitope from LCMV                | Richard Webby ( <a href="#">Mueller et al., 2010</a> )       | Grown up in house                                                                                       |
| LCMV Armstrong strain                                                        | Rafi Ahmed                                                   | Grown up in house                                                                                       |
| Vaccinia virus expressing the GP33-41 epitope from LCMV                      | <a href="#">Rodriguez et al., 1998</a>                       | N/A                                                                                                     |
| <b>Chemicals, Peptides, and Recombinant Proteins</b>                         |                                                              |                                                                                                         |
| NP <sub>366-374</sub> peptide (sequence ASNENMETM)                           | GenScript                                                    | Cat#RP20267; N/A                                                                                        |
| GP <sub>33-41</sub> peptide (sequence KAVYNFATM)                             | GenScript                                                    | Cat#RP20257; N/A                                                                                        |
| 5-bromo-2'-deoxyuridine (BrdU)                                               | Sigma-Aldrich                                                | Cat#19-160; N/A                                                                                         |
| <b>Deposited Data</b>                                                        |                                                              |                                                                                                         |
| Raw and analyzed microarray data                                             | This paper                                                   | GEO: GSE149425                                                                                          |
| <b>Experimental Models: Organisms/Strains</b>                                |                                                              |                                                                                                         |
| Mouse: WT C57BL/6J strain                                                    | The Jackson Lab                                              | Stock No. 000664; RRID:IMSR_JAX:000664                                                                  |
| Mouse: PD-1 KO C57BL/6                                                       | Originally described in <a href="#">Keir et al., 2007</a>    | Mouse line developed in house, available from the Jackson lab as Stock No. 028276; RRID:IMSR_JAX:028276 |
| Mouse: PD-L1/L2 DKO C57BL/6 mice                                             | Originally described <a href="#">Keir et al., 2006</a>       | Mouse line developed in house, available from the Jackson lab as MMRRC Stock No. 32239-JAX; N/A         |
| Mouse: P14 TCR transgenic mice                                               | Originally described in <a href="#">Pircher et al., 1989</a> | N/A                                                                                                     |
| <b>Software and Algorithms</b>                                               |                                                              |                                                                                                         |
| GraphPad Prism                                                               | GraphPad Software                                            | N/A                                                                                                     |
| Flow Jo                                                                      | Tree Star                                                    | N/A                                                                                                     |

(Continued on next page)

**Continued**

| REAGENT or RESOURCE                                                                                                                                                     | SOURCE                                                                             | IDENTIFIER          |
|-------------------------------------------------------------------------------------------------------------------------------------------------------------------------|------------------------------------------------------------------------------------|---------------------|
| Other                                                                                                                                                                   |                                                                                    |                     |
| BD GolgiPlug Protein Transport Inhibitor (containing Brefeldin A)                                                                                                       | BD Biosciences                                                                     | Cat#555029; N/A     |
| Vybrant FAM Poly Caspases Assay Kit (FLICA)                                                                                                                             | Thermo Fisher Scientific                                                           | Cat#V35117; N/A     |
| LIVE/DEAD Fixable Aqua Dead Cell Stain Kit                                                                                                                              | Thermo Fisher Scientific                                                           | Cat#L34966; N/A     |
| LIVE/DEAD Fixable Near-IR Dead Cell Stain Kit                                                                                                                           | Thermo Fisher Scientific                                                           | Cat#L10119; N/A     |
| eBioscience Foxp3/transcription factor fixation/permeabilization kit                                                                                                    | Thermo Fisher Scientific                                                           | Cat#00-5521-00; N/A |
| BD Cytotfix/Cytoperm fixation/permeabilization kit                                                                                                                      | BD Biosciences                                                                     | Cat#554714; N/A     |
| D <sup>p</sup> GP <sub>33-41</sub> biotinylated monomer, conjugated to Steptavidin R-Phycoerythrin (Cat#S866) or Allophycocyanin (Cat#S868) to make tetramer in house   | NIH Tetramer Core Facility or prepared in house as described (Wherry et al., 2003) | N/A                 |
| D <sup>p</sup> PA <sub>224-233</sub> biotinylated monomer, conjugated to Steptavidin R-Phycoerythrin (Cat#S866) or Allophycocyanin (Cat#S868) to make tetramer in house | NIH Tetramer Core Facility or prepared in house as described (Wherry et al., 2003) | N/A                 |
| D <sup>p</sup> NP <sub>366-374</sub> biotinylated monomer, conjugated to Steptavidin R-Phycoerythrin (Cat#S866) or Allophycocyanin (Cat#S868) to make tetramer in house | NIH Tetramer Core Facility or prepared in house as described (Wherry et al., 2003) | N/A                 |
| Steptavidin, R-Phycoerythrin Conjugate (SA-PE)                                                                                                                          | Thermo Fisher Scientific                                                           | Cat#S866; N/A       |
| Streptavidin, Allophycocyanin crosslinked, conjugate                                                                                                                    | Thermo Fisher Scientific                                                           | Cat#S868; N/A       |
| RNAAdvance tissue isolation kit (Agencourt) (for microarray profiling)                                                                                                  | Agencourt Bioscience, Beckman Coulter                                              | Cat#A32645; N/A     |
| WT-Ovation One Direct System (NuGEN) (for microarray profiling)                                                                                                         | NuGEN                                                                              | Cat#3500-12; N/A    |
| Affymetrix Mouse 430_2 microarray (for microarray profiling)                                                                                                            | Thermo Fisher Scientific                                                           | Cat#900495; N/A     |

**RESOURCE AVAILABILITY**

**Lead Contact**

Further information and requests for resources and reagents should be directed to and will be fulfilled by the Lead Contact, Arlene H. Sharpe ([Arlene\\_Sharpe@hms.harvard.edu](mailto:Arlene_Sharpe@hms.harvard.edu)).

**Materials Availability**

This study did not generate new unique reagents.

**Data and Code Availability**

The microarray data generated during this study are available on GEO. The accession number for the microarray data reported in this paper is GEO: GSE149425. This study did not generate unique code.

**EXPERIMENTAL MODEL AND SUBJECT DETAILS**

**Mice**

For primary infections, 6-12 week old mice were utilized. Wild-type (WT) C57BL/6 mice were purchased from the Jackson Laboratory (stock number 000664). PD-1 KO and PD-L1/L2 DKO have been described (Keir et al., 2006, 2007), and are available from the Jackson Laboratory (stock numbers 028276 and 32239-JAX, respectively). For primary infections of intact WT, PD-1 KO, and PD-L1/L2 DKO mice male or female mice were utilized. Age and gender matched mice were used for all experiments. To generate PD-1 KO P14 mice, PD-1 KO mice were crossed to P14 TCR transgenic mice (Pircher et al., 1989). Ly5.2<sup>+</sup> or Ly5.2<sup>+</sup>Ly5.1<sup>+</sup> PD-1 KO and WT P14 cells were isolated from the blood and transferred i.v. into WT C57BL/6 mice (Ly5.2<sup>+</sup>) at a 1:1 ratio (500 cells each) at least one day prior to infection. Female P14 TCR transgenic mice were used as donors, and WT female mice were used for recipients. For naive mouse studies, female WT, PD-1 KO, and PD-L1/L2 DKO mice between 8-12 weeks of age and female WT and PD-1 KO P14 between 16-21 weeks of age were utilized. All mice were maintained in specific pathogen-free facilities at Harvard Medical School.

or the University of Pennsylvania and maintained under standard housing, husbandry, and diet conditions according to Institutional Animal Care and Use Committee and NIH guidelines. All experimental procedures performed had been approved by the Institutional Animal Care and Use Committee at each institution.

### Viral infections and antibody treatments

Viruses were administered via the intranasal (i.n.) route to generate respiratory infections. Most studies utilized primary influenza X31 expressing the GP<sub>33-41</sub> epitope from LCMV (X31-GP33,  $1.6 \times 10^5$  TCID<sub>50</sub>) (Laidlaw et al., 2013). In some studies, primary LCMV Armstrong (10<sup>4</sup> PFU), vaccinia virus-expressing GP<sub>33-41</sub> from LCMV (VV-GP33, 10<sup>4</sup> PFU) (Rodriguez et al., 1998), or influenza strain PR8 expressing the GP<sub>33-41</sub> epitope from LCMV (PR8-GP33, 0.3 LD<sub>50</sub>) (Mueller et al., 2010) were used and delivered via the i.n. route. For re-challenge experiments (secondary PR8-GP33 challenge), mice were infected i.n. with PR8-GP33 (10 LD<sub>50</sub>) at > 35 days after primary infection. Recombinant influenza strains containing the LCMV GP<sub>33-41</sub> epitope were provided by Dr. Richard Webby (St. Jude Children's Research Hospital, Memphis, TN) (Laidlaw et al., 2013; Mueller et al., 2010). Viral titers in lungs were determined by quantitative real-time PCR as described (Laidlaw et al., 2013). For *in vivo* antibody blockade experiments, WT C57BL/6 mice were given 200 μg per mouse per injection of rat anti-PD-1 (clone 29F.1A12) or isotype control antibody (Rat IgG2a, clone 2A3 from BioXCell) on days -1, 2, and 5 p.i. and analyzed at day 8 p.i., or on days -1, 2, 5, and 8 p.i. and analyzed at day 60<sup>+</sup> p.i.

## METHOD DETAILS

### Isolation of Lymphocytes and Flow Cytometry

Lymphocytes were isolated from spleen, lung and lung draining LNs as described (Laidlaw et al., 2013). Single cell suspensions were stained with fluorescently labeled antibodies specific to: CD8α (clone 53-6.7), CD44 (clone IM7), IFNγ (clone XMG1.2), TNFα (clone MP6-XT22), CD127 (clone SB/199 or A7r34), CD122 (clone TM-β1), CXCR3 (clone CXCR3-173), Tim-3 (clone RMT3-23), CD160 (clone 7H1), CD25 (clone PC61), CD69 (clone H1.2F3), CD62L (MEL-14), TCR Vα2 (B20.1), CD45.1 (clone A20), CD45.2 (clone 104), PD-1 (clone RMP1-30), PD-L1 (clone 10F.9G2), PD-L2 (clone TY25), CD11b (clone M1/70), CD11c (clone N418), CD19 (clone 6D5), CD4 (clone GK1.5), CD326 or Ep-CAM (clone G8.8), and CD31 (clone 390) purchased from BioLegend, Ki-67 (clone B56), CD3 (clone 145-2C11), CD8α (clone 53-6.7), and CD62L (clone MEL-14) from BD Biosciences, CD4 (RM4-5) and KLRG1 (clone 2F1) from Thermo Fisher Scientific, and KLRG1 (clone 2F1) from Abcam and Southern Biotech. Intracellular staining for Ki-67 was performed following permeabilization with the eBioscience Foxp3/transcription factor fixation/permeabilization kit according to manufacturer's instructions (Thermo Fisher Scientific). Poly-caspase analysis was performed with the FLICA Vybrant FAM Assay Kit according to manufacturer's instructions (Thermo Fisher Scientific). Dead cell exclusion was performed by live/dead fluorescent reactive dye (Thermo Fisher Scientific) staining according to manufacturer's instructions. H-2 D<sup>b</sup>GP<sub>33-41</sub>, D<sup>b</sup>NP<sub>366-374</sub>, and D<sup>b</sup>PA<sub>224-233</sub> biotinylated monomers were either made as described (Wherry et al., 2003) or obtained from the National Institutes of Health (NIH) tetramer core facility, conjugated to Streptavidin-R-Phycoerythrin or Streptavidin-Allophycocyanin (Thermo Fisher Scientific) in house to make tetramers as recommended by the NIH tetramer core facility, and used as recommended. For intracellular cytokine staining (ICS), single cell suspensions from spleens or lungs, which included T cells as well as APCs from the same animal, were incubated with 0.5 μg/ml influenza NP<sub>366-374</sub> or GP<sub>33-41</sub> peptide (Genscript) or no peptide for 5 hours at 37°C in the presence of GolgiPlug (BD Biosciences), surface stained, fixed/permeabilized, and intracellularly stained using the Cytofix/Cytoperm kit (BD Biosciences) as directed by the manufacturer. For BrdU detection, animals were treated with 2 mg of BrdU (Sigma-Aldrich) i.p. 12-24 hours prior to analysis. BrdU incorporation was assessed by the BrdU Flow Kit per manufacturer's instructions (BD Biosciences). Data were acquired on a LSR II or Symphony flow cytometer (BD) and analyzed using FlowJo software (Tree Star).

### Gene Expression Microarray

CD8<sup>+</sup> T cells specific for the subdominant (GP<sub>33-41</sub>, PA<sub>224-233</sub>) influenza epitopes were sorted from the lungs of WT and PD-L1/L2 DKO mice on d8 following X31-GP33 infection. For the microarray, RNA was extracted using RNeasy lysis reagent (Qiagen) and amplified using the WT-Ovation One Direct System (NuGEN). Fragmented and labeled cDNA was hybridized to Affymetrix Mouse430\_2 microarray. Microarray data were processed and analyzed as described previously (Haining et al., 2008; Subramanian et al., 2005).

## QUANTIFICATION AND STATISTICAL ANALYSIS

All non-microarray data were analyzed for statistical significance using GraphPad Prism software. Statistical details of experiments (including the statistical tests used, number of animals in each experiment, number of times experiments have been replicated, and precision measures) can be found in the Figure Legends. Statistical tests performed included Student's t tests, one way ANOVA, or two way ANOVA. *P* values < 0.05 were considered significant. Asterisks in the figure legends indicating significance correspond to: \* *p* < 0.05, \*\* *p* < 0.01, \*\*\* *p* < 0.001.



**Supplemental Information**

**The PD-1 Pathway Regulates Development  
and Function of Memory CD8<sup>+</sup> T Cells  
following Respiratory Viral Infection**

**Kristen E. Pauken, Jernej Godec, Pamela M. Odorizzi, Keturah E. Brown, Kathleen B. Yates, Shin Foong Ngiow, Kelly P. Burke, Seth Maleri, Shannon M. Grande, Loise M. Francisco, Mohammed-Alkhatim Ali, Sabrina Imam, Gordon J. Freeman, W. Nicholas Haining, E. John Wherry, and Arlene H. Sharpe**

Figure S1

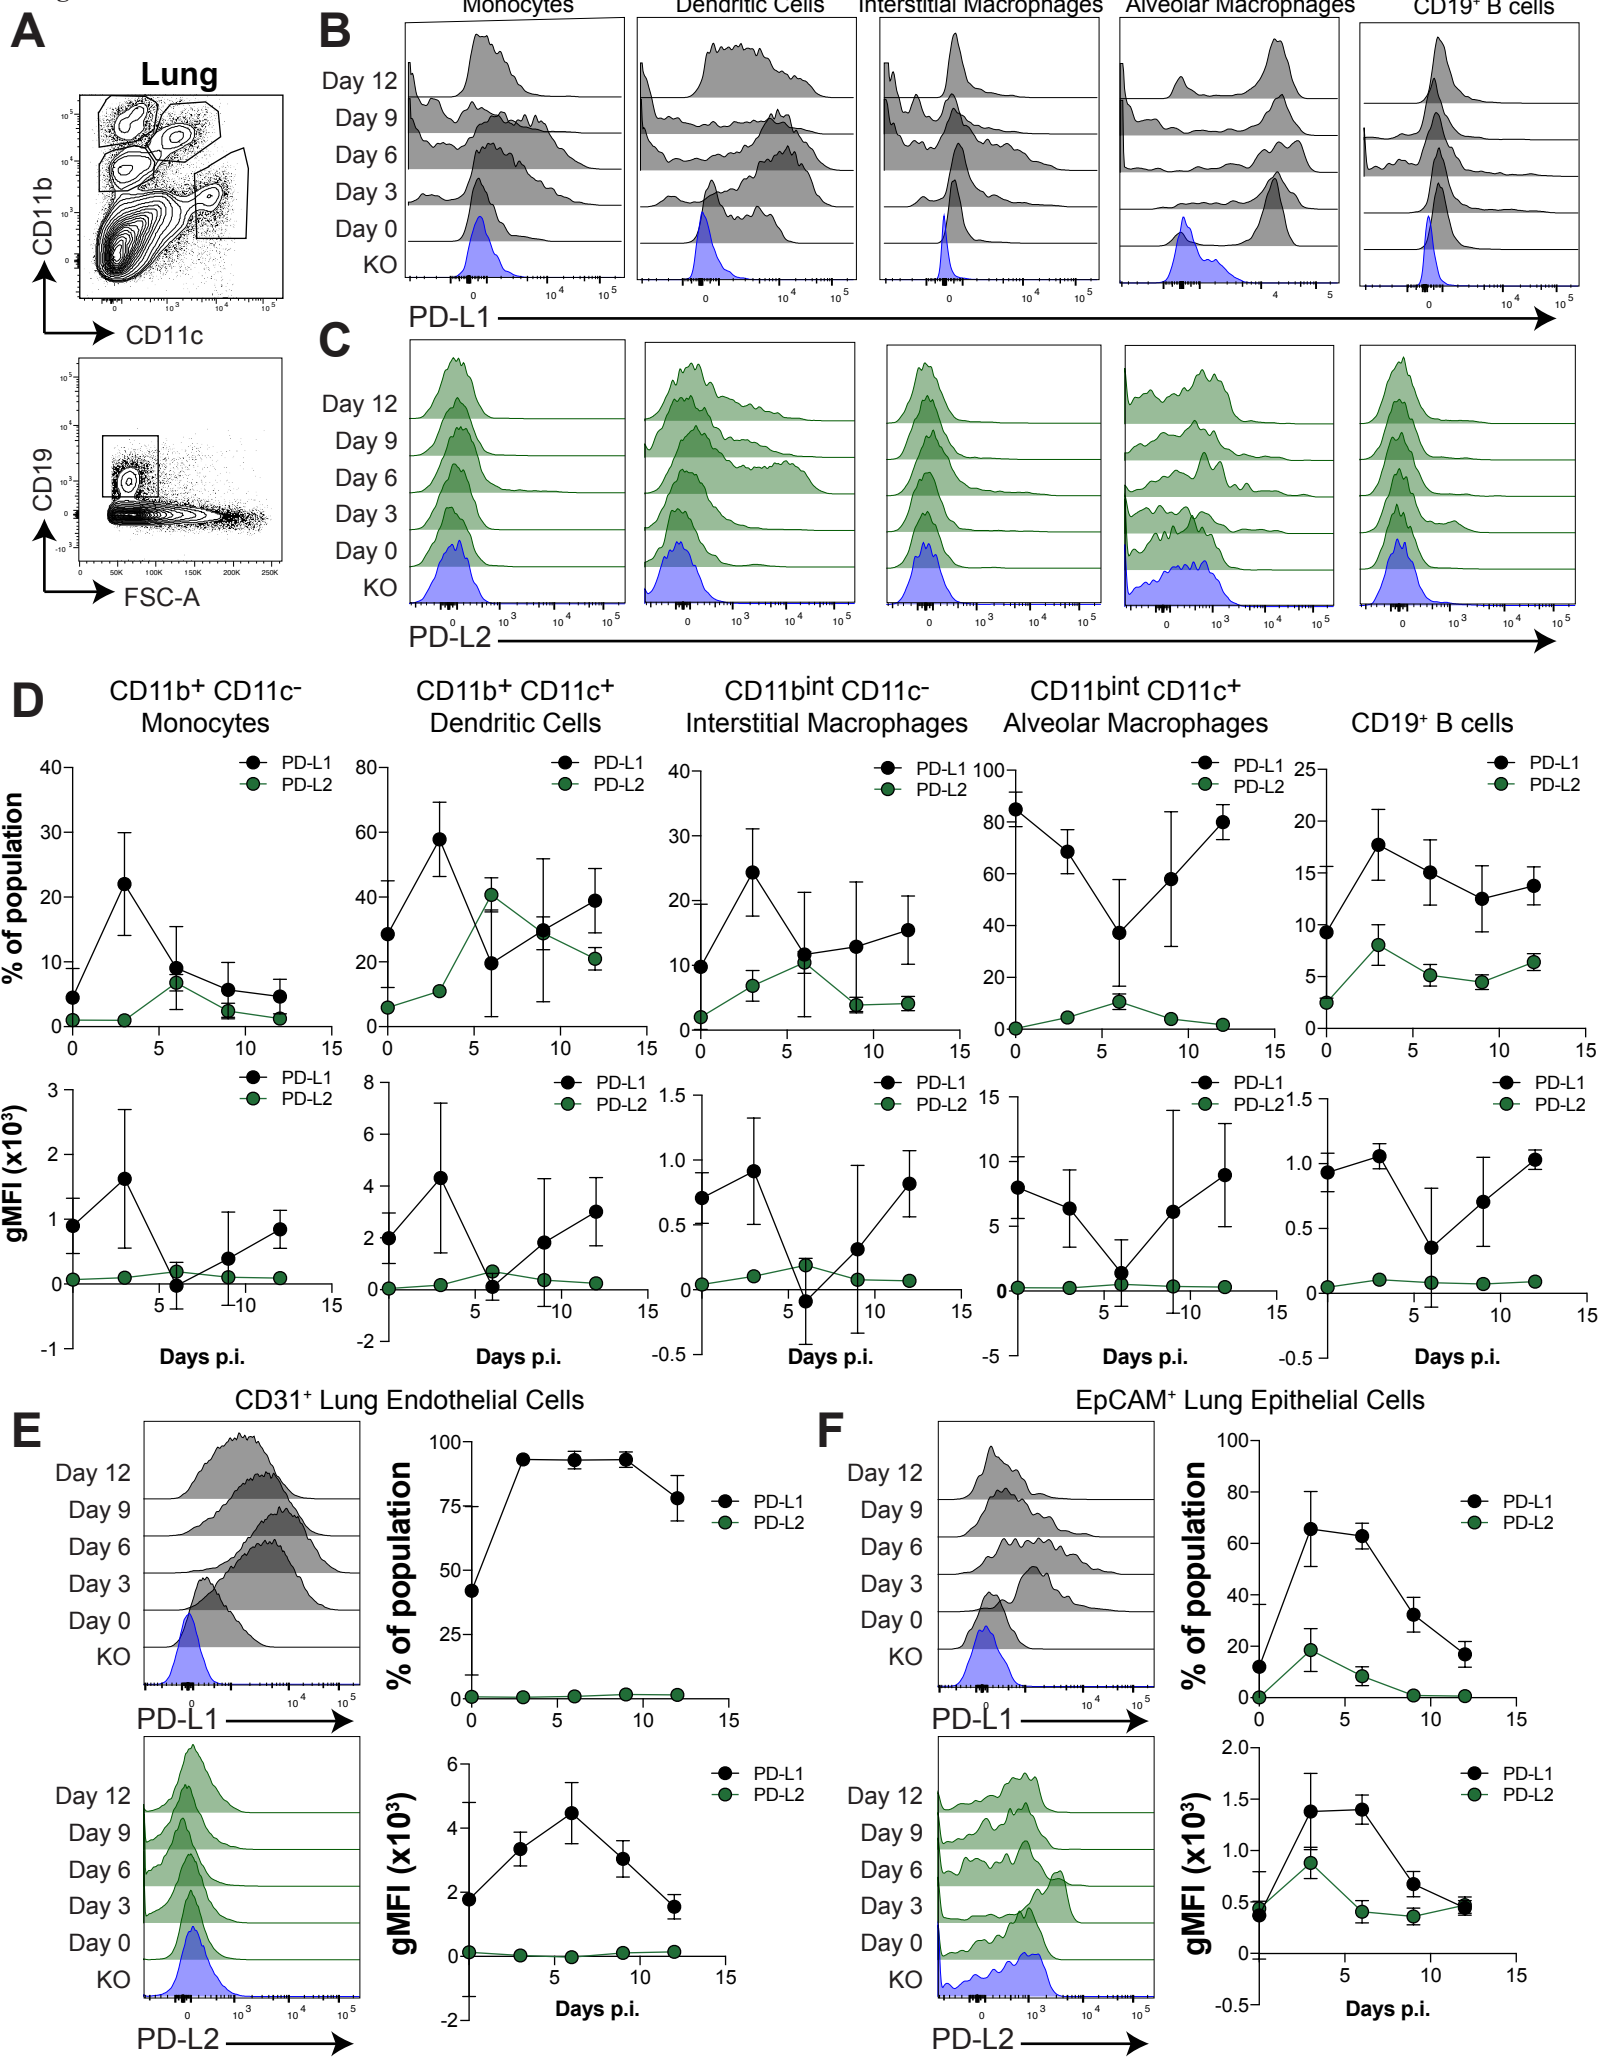

**Figure S1, related to Figure 1.** Expression of PD-L1 and PD-L2 on lung cell subsets following influenza infection. Phenotypic analysis of PD-L1 and PD-L2 expression on cell subsets following X31-GP33 infection. (A) Gating strategy used for lung myeloid subsets and B cells in (B - D). Expression of PD-L1 (black) and PD-L2 (green) in lung myeloid subsets and B cells (B - D), endothelial cells (E), and epithelial cells (F) following primary X31-GP33 influenza infection. Blue histogram indicates KO control. Representative flow cytometry histograms and summary data of 5 mice per group shown for each population. Data are represented as mean  $\pm$  SEM. Abbreviations used include: MFI=mean fluorescence intensity, p.i.=post-infection.

Figure S2

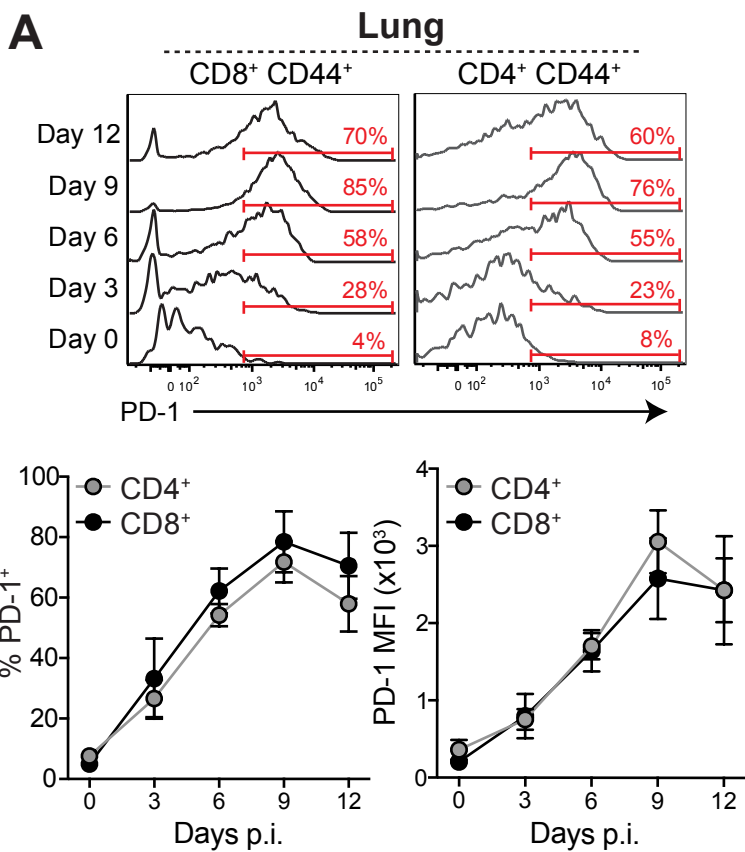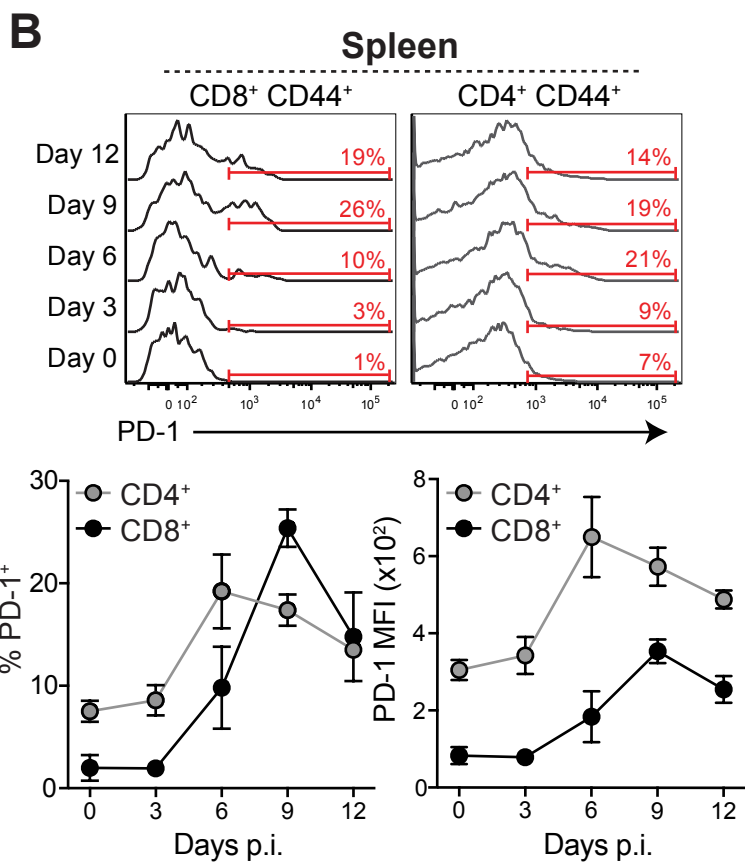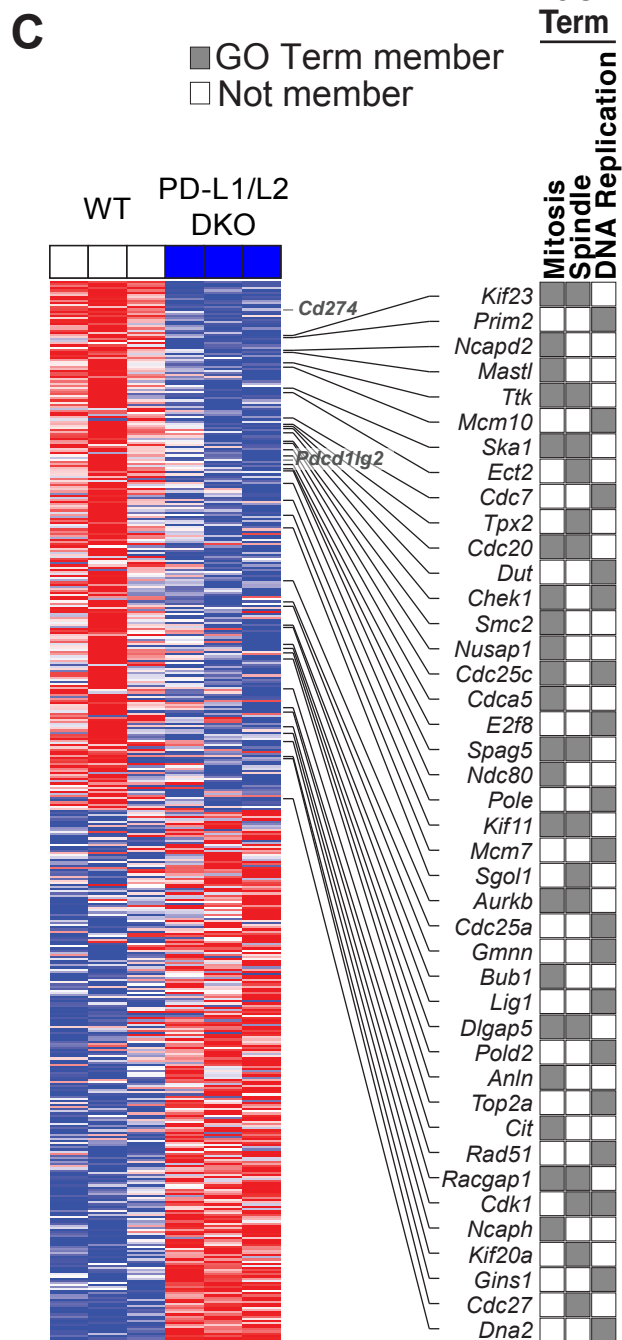

**Figure S2, related to Figure 1.** Expression of PD-1 on lung cell subsets following influenza infection and gene expression in PD-1 pathway deficient mice. (A, B) WT mice were infected with X31-GP33 influenza and antigen-experienced CD44<sup>+</sup> CD8<sup>+</sup> and CD44<sup>+</sup> CD4<sup>+</sup> T cells were analyzed for their expression of PD-1 before (d0) and after (d3-d12) infection in the lung (A) and spleen (B). Representative plots (top) and summarized frequencies (of parent gate) and MFI shown (bottom). CD4<sup>+</sup> T cells are shown in grey, CD8<sup>+</sup> T cells are shown in black. Representative flow cytometry histograms and summary of data of 5 mice per group shown for each population. These data are from one representative experiment with mean  $\pm$  SD. Data from key time points (days 0, 8) are representative of 2-3 independent experiments with 2-7 mice per group. (C) Top 250 differentially expressed genes in subdominant-epitope (D<sup>b</sup>GP<sub>33-41</sub> and D<sup>b</sup>PA<sub>224-233</sub>) specific T cells from WT and PD-L1/PD-L2 DKO mice ranked by signal-to-noise values following filtration to top 10% of genes with highest mean absolute deviation across samples. Membership of genes in the three representative GO terms is shown on the right. Abbreviations used include: MFI=mean fluorescence intensity, p.i.=post-infection, GO=Gene Ontogeny.



Figure S3

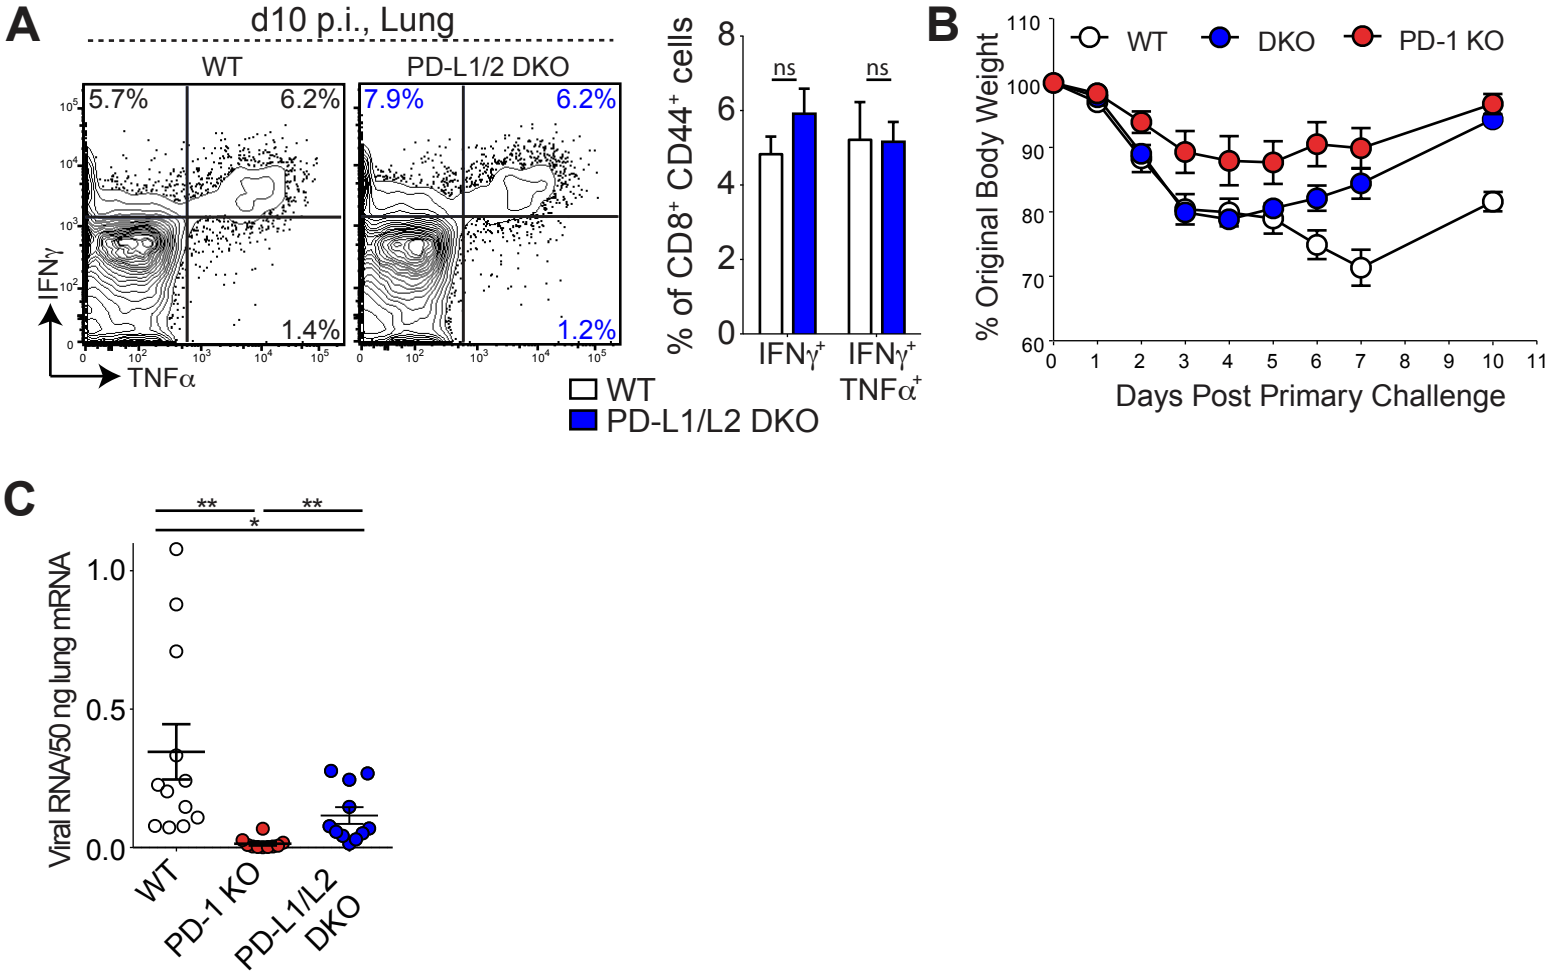

**Figure S3, related to Figure 1.** PD-1 deficient mice show enhanced disease control following primary X31-GP33 infection. (A) Representative plots of intracellular cytokine staining for IFN- $\gamma$  and TNF- $\alpha$  production in lung CD8<sup>+</sup> T cells on d10 p.i. following *ex vivo* stimulation with NP<sub>366-374</sub> peptide. Representative plots gated on CD8<sup>+</sup> CD44<sup>+</sup> T cells (left) and summary of percent responding cells (right) from 5 mice per group. (B) Weight loss in WT, PD-1 KO, and PD-L1/L2 DKO mice following primary infection with X31-GP33. (C) Influenza viral titers in the lung of WT, PD-1 KO, and PD-L1/L2 DKO mice at d7 p.i. Data are representative of 2-3 independent experiments with 3-5 mice per experiment. Data are represented as mean  $\pm$  SEM. Significance was assessed using Student's t-test; ns = not significant P > 0.05, \*P < 0.05, \*\*P < 0.01. Abbreviations used include: p.i.=post-infection.

Figure S4

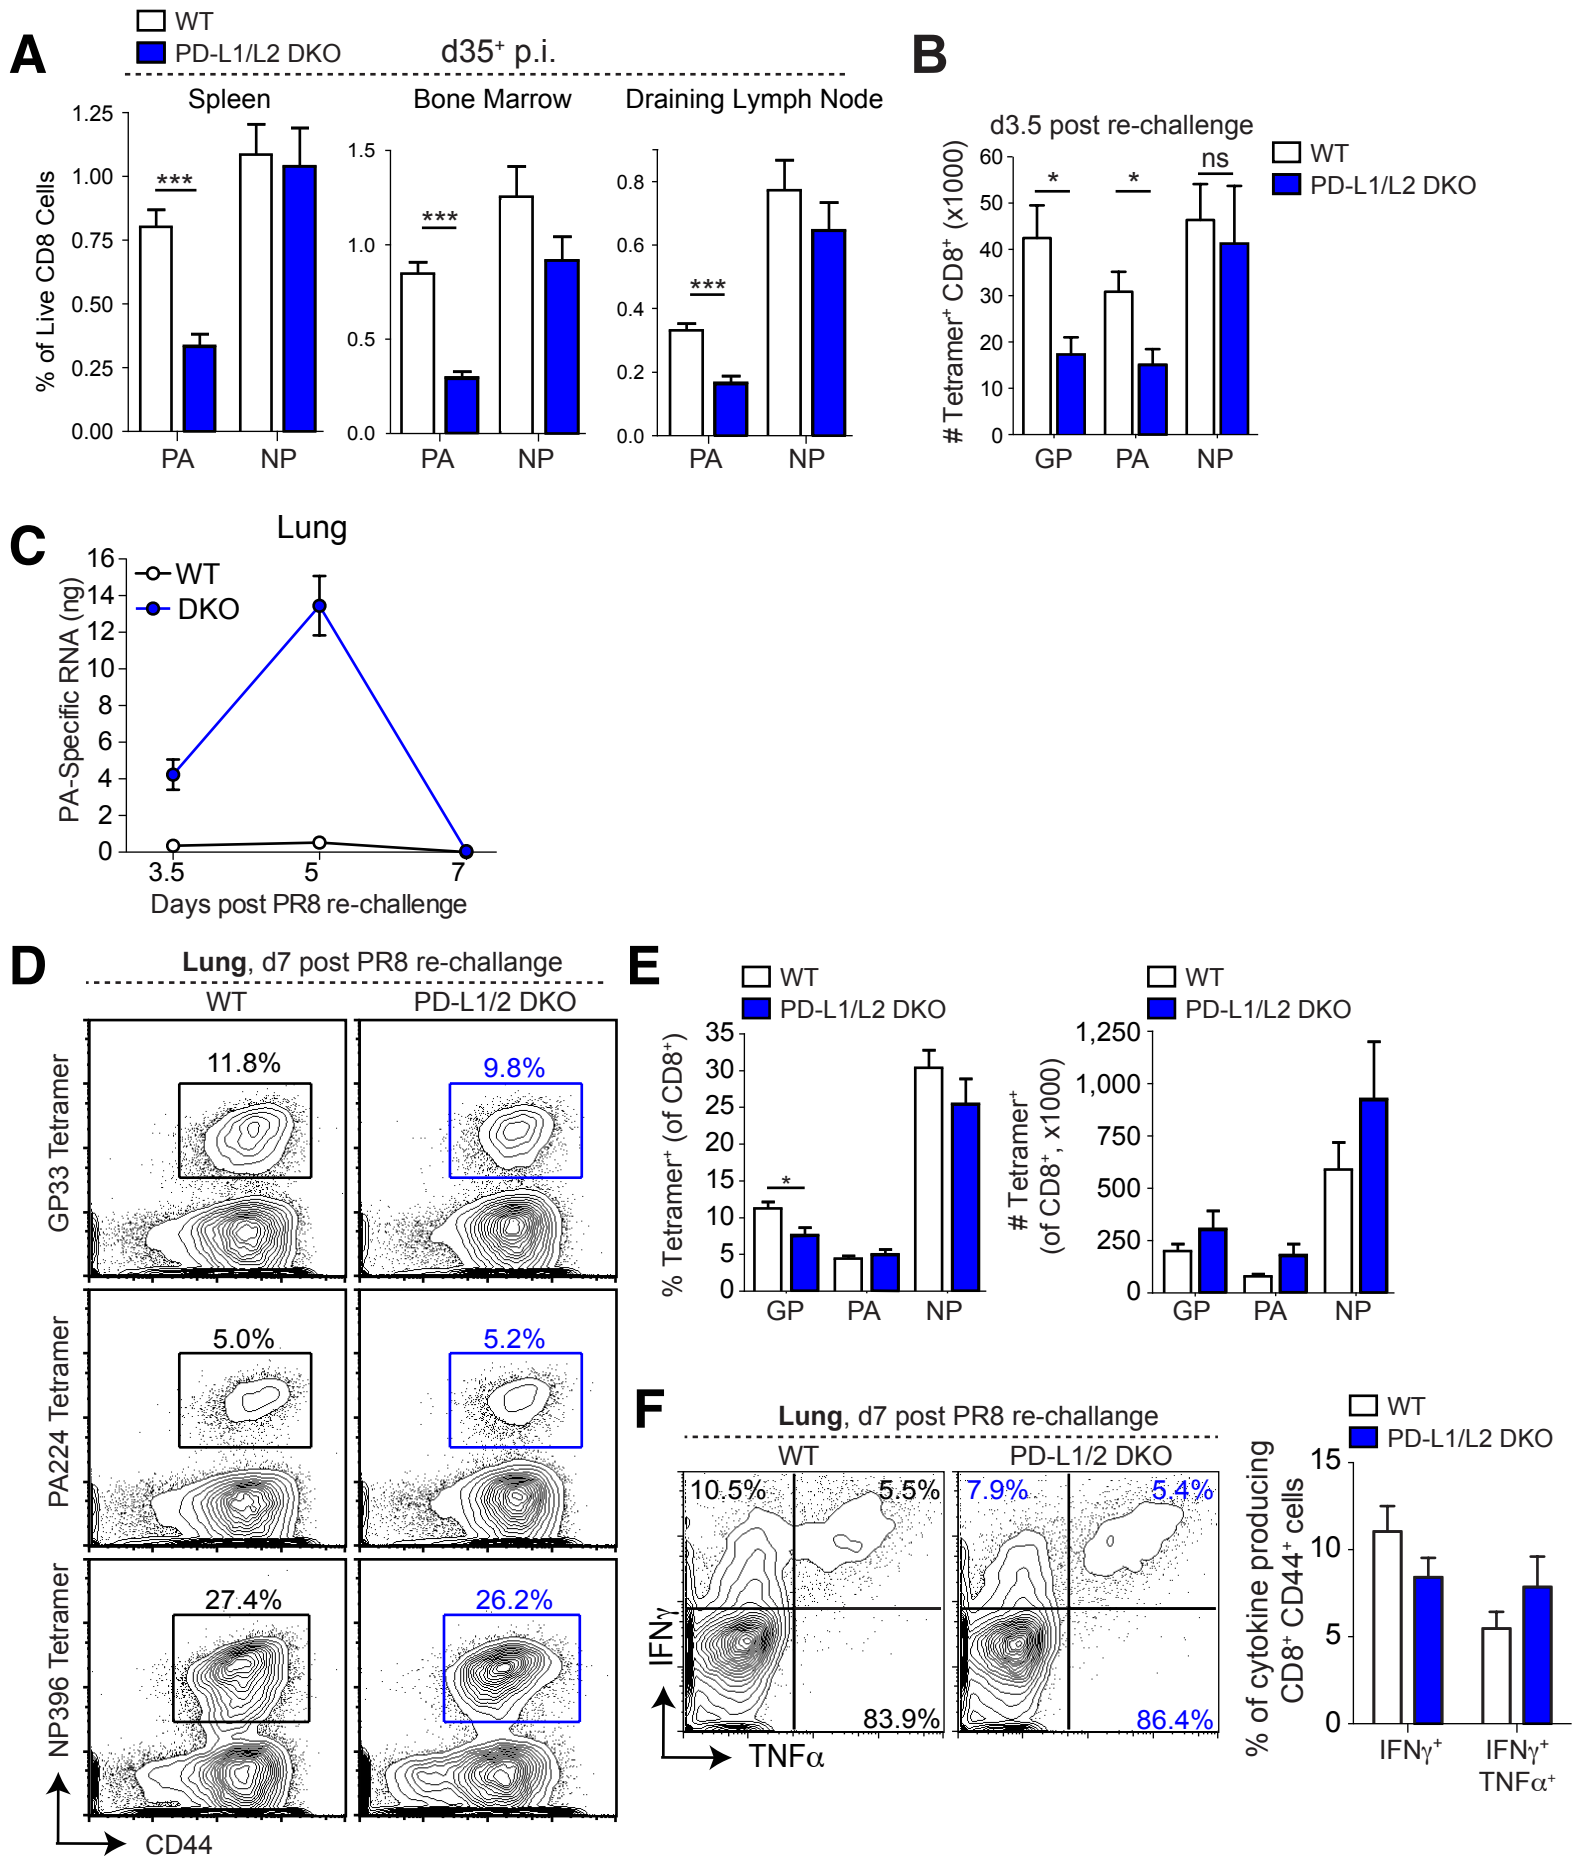

**Figure S4, related to Figure 2.** Influenza-specific CD8<sup>+</sup> T cell numbers normalize at day 7 after secondary PR8-GP33 infection. (A) Summary of frequencies of memory CD8<sup>+</sup> T cells specific for influenza epitopes in the spleen (left), bone marrow (middle) and lung draining LN (right) in WT and PD-L1/PD-L2 DKO mice at d35<sup>+</sup> p.i. following primary X31-GP33 infection. (B) Summary of numbers of indicated tetramer<sup>+</sup> CD8<sup>+</sup> T cells in the lungs of WT and PD-L1/L2 DKO mice at d3.5 post-re-challenge with PR8-GP33. (C) Kinetics of viral clearance in WT and PD-L1/L2 DKO mice following secondary infection with PR8-GP33, 35 days following primary X31-GP33 infection. (D) Representative plots showing the frequencies of D<sup>b</sup>GP<sub>33-41</sub><sup>+</sup> (upper), D<sup>b</sup>PA<sub>224-233</sub><sup>+</sup> (middle) and D<sup>b</sup>NP<sub>366-374</sub><sup>+</sup> (lower) CD8<sup>+</sup> T cells in the lungs of X31-GP33 immune WT and PD-L1/L2 DKO mice on d7 post-rechallenge with PR8-GP33. (E) Summary of mice shown in (D) indicating frequencies (left) and numbers (right) of CD8<sup>+</sup> T cells specific for influenza epitopes in lung of WT and PD-L1/L2 DKO mice on d7 post-rechallenge with PR8-GP33. (F) Representative plots for IFN $\gamma$  and TNF $\alpha$  production in lung CD8<sup>+</sup> T cells from (D) and (E) stimulated *ex vivo* with NP<sub>366-374</sub> peptide (left). Fraction of responding cells summarized (right). Data are representative of 2-4 independent experiments with 4-5 mice per experiment. Data are represented as mean  $\pm$  SEM. Significance was assessed using Student's t-test; \*P < 0.05, \*\*\*P < 0.001. Abbreviations used include: GP=D<sup>b</sup>GP<sub>33-41</sub> tetramer, PA=D<sup>b</sup>PA<sub>224-233</sub> tetramer, NP=D<sup>b</sup>NP<sub>366-374</sub> tetramer.

Figure S5

**A**

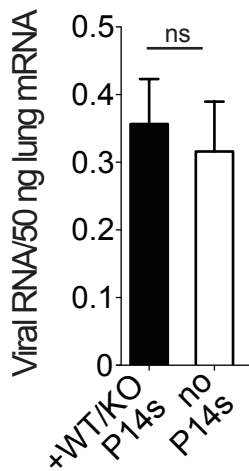

**C**

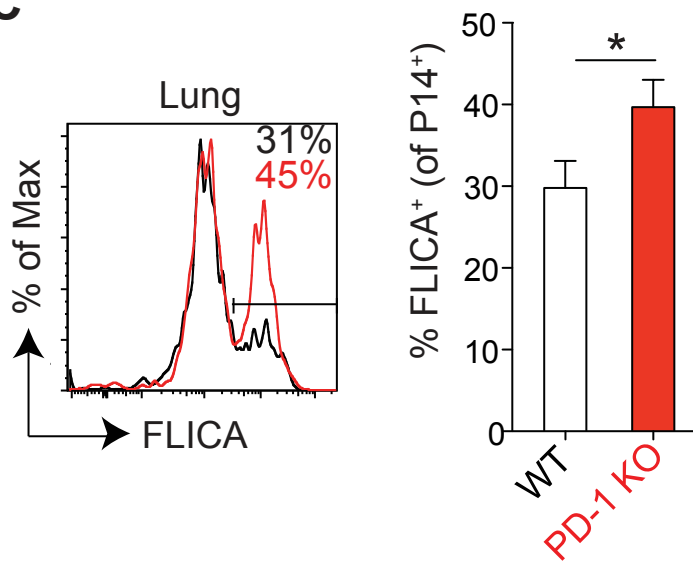

**B**

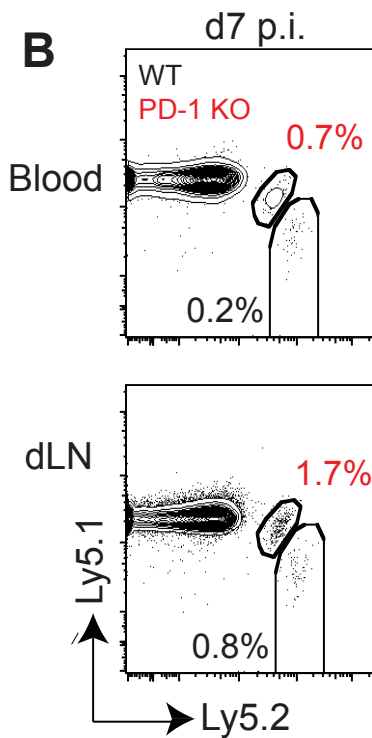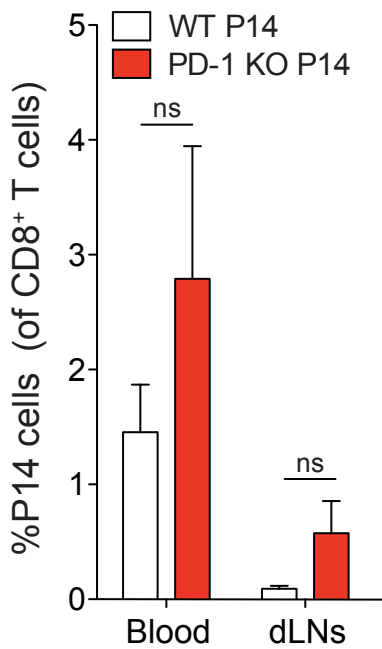

**D**

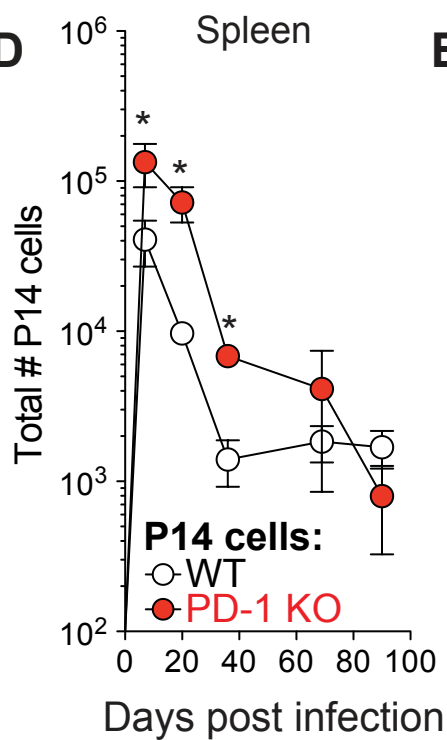

**E**

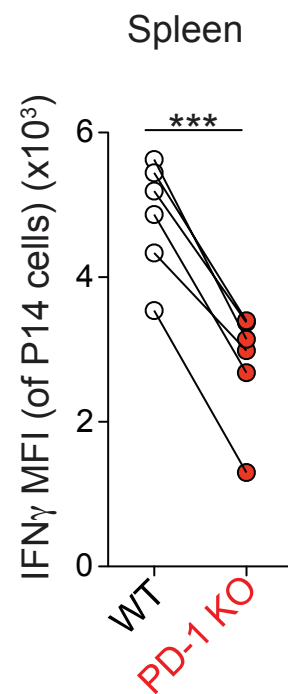



**Figure S5, related to Figure 3.** PD-1 controls CD8<sup>+</sup> T cell functions in a cell-intrinsic manner. (A) Quantification of viral load d8 after X31-GP33 infection in WT mice compared to WT mice that received a 50:50 mixture of WT and PD-1 KO P14 cells. (B) Representative plots (left) showing frequencies of WT and PD-1 KO P14 cells in indicated organs at d7 after X31-GP33 infection. Numbers indicate frequency of P14 cells as a percent of CD8<sup>+</sup> T cells. Summary of frequencies is shown on the right. (C) Flow cytometric analysis of active caspase by FLICA staining of lung WT and PD-1 KO P14 T cells on d8 p.i. Numbers indicate fraction of P14 cells positive for FLICA staining based on unstained controls. Representative histogram shown (left) and summary of frequencies of FLICA<sup>+</sup> cells shown (right). (D) Longitudinal analysis of WT and PD-1 KO P14 absolute cell numbers in the spleen during primary X31-GP33 infection. (E) Summary of MFI of WT and PD-1 KO P14 cell IFN- $\gamma$  expression on d60<sup>+</sup> p.i. with X31-GP33 following *ex vivo* stimulation with GP<sub>33-41</sub> peptide. Data are representative of 3 independent experiments with 4-5 mice per group. Data are represented as mean  $\pm$  SEM. Significance was assessed using Student's t-test; \*P < 0.05, \*\*\* P < 0.001. Abbreviations used include: MFI=mean fluorescence intensity.

**Figure S6****A.**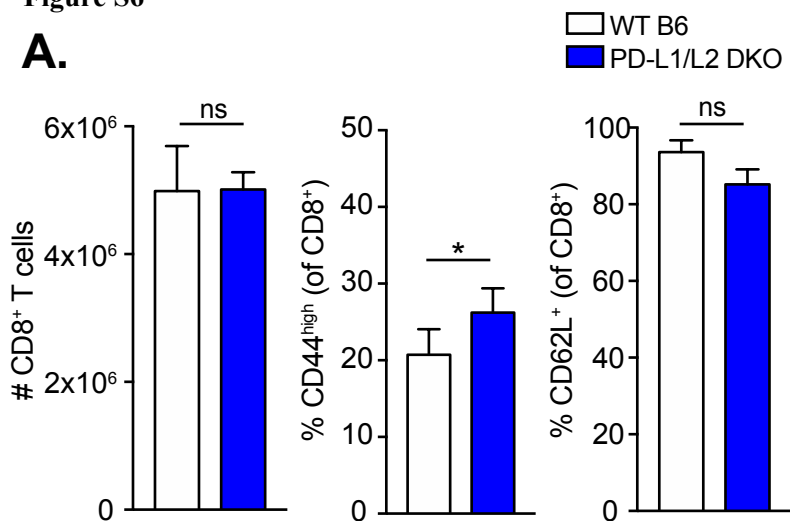**B.**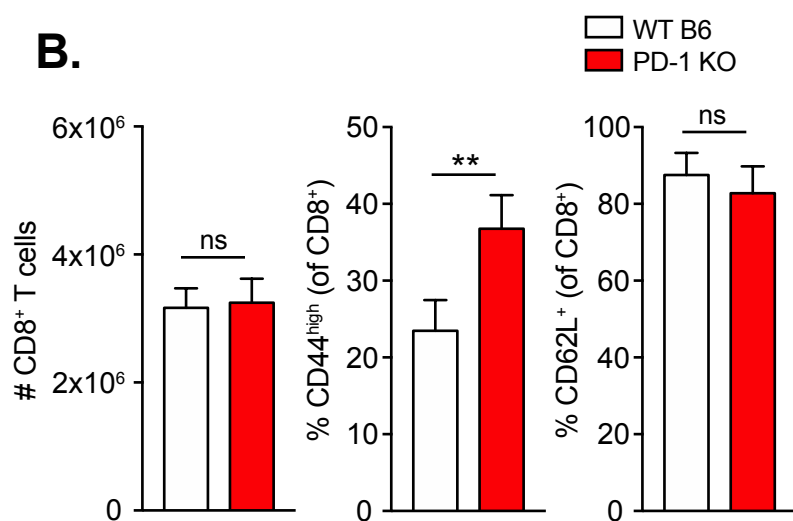**C.**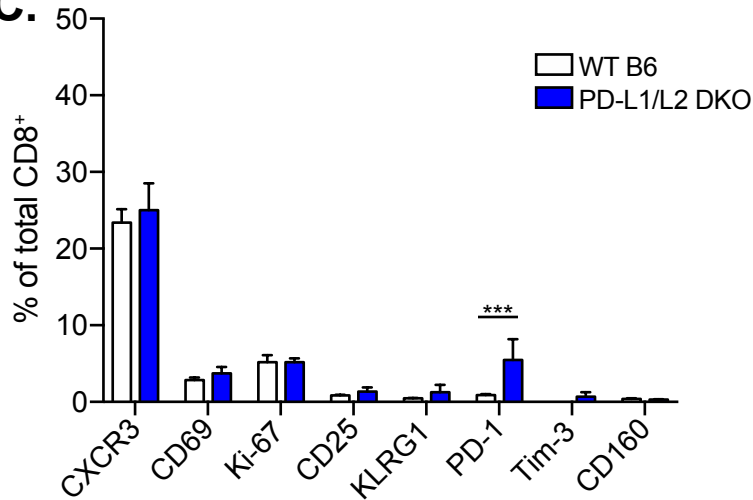**D.**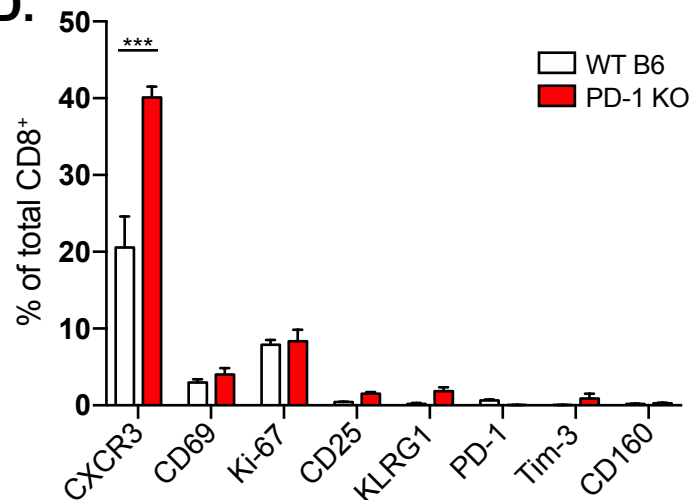**E.**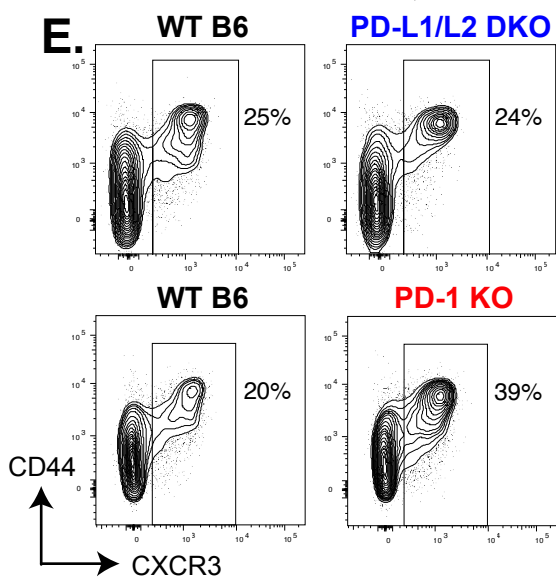**F.**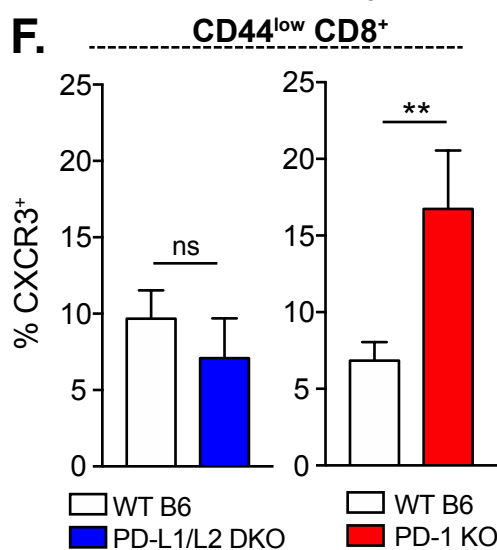**G.**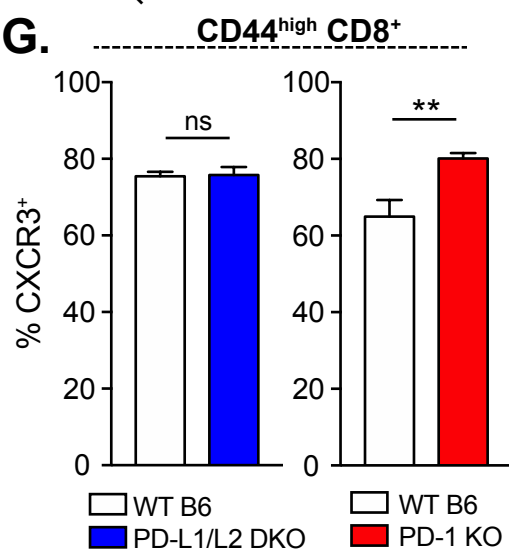**H.**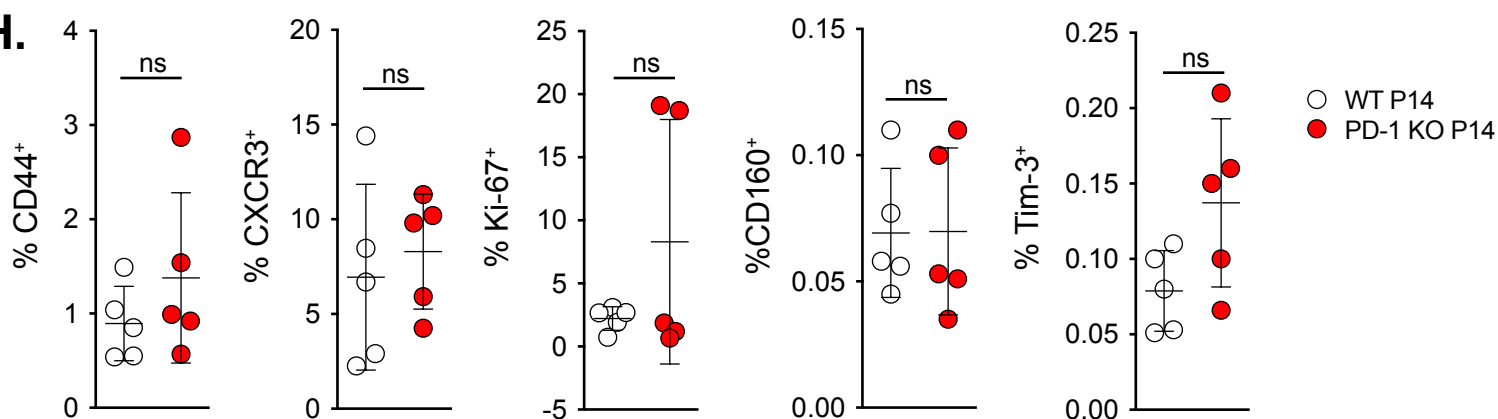

**Figure S6, related to Figure 3.** Phenotypic characterization of CD8<sup>+</sup> T cells in the steady state in naïve PD-1 KO, PD-L1/L2 DKO, and PD-1 KO P14 mice compared to WT. (A, B) Number of CD8<sup>+</sup> T cells (left), frequency of CD44<sup>high</sup> cells of the CD8<sup>+</sup> T cell population (middle), and frequency of CD62L<sup>+</sup> cells of the CD8<sup>+</sup> T cell population (right) in the spleen of uninfected 8-12 week old WT and PD-L1/L2 DKO mice (A) or WT and PD-1 KO mice (B). (C, D) Frequency of CD8<sup>+</sup> T cells in the spleen of the WT vs. PD-L1/L2 DKO (C) and PD-1 KO (D) shown in (A) and (B) that are positive for the indicated markers. (E) Representative flow cytometry contour plots showing CD44 and CXCR3 expression on CD8<sup>+</sup> T cells in spleens from WT, PD-L1/L2 DKO, and PD-1 KO mice shown in (A)-(D). (F, G) Quantification of the frequency CD8<sup>+</sup> CD44<sup>low</sup> (F) or CD44<sup>high</sup> cells (G) expressing CXCR3 in the spleen of WT and PD-L1/L2 DKO mice (left) or WT and PD-1 KO mice (right). (H) Frequency of P14 cells in the peripheral blood of intact WT or PD-1 KO P14 mice that are positive for the indicated markers. Data are representative of 2 independent experiments with 4-6 mice per group. Data are represented as mean ± SEM. Significance was assessed using unpaired Student's t-test in (A), (B), (F), (G), and (H), and 2 way ANOVA using multiple comparisons (Sidak's) post-test for (C) and (D); \*\*P < 0.01, \*\*\* P < 0.001.
